# Supplementary material for: Foraging ecology of the amphibious mudskipper Periophthalmus chrysospilos (Gobiiformes: Gobiidae)
Source: PeerJ. 2021 Dec 7;9:e12582. doi: 10.7717/peerj.12582 (PMC8663654; doi:10.7717/peerj.12582)
Supplement: Supplemental Information 1 [file peerj-09-12582-s001.xlsx]

## Sheet: Food
No.	W	TL	Lg	Wacetes	Wactinopterygii	Wmollusca	Wuca	Wpolychaeta	Wdolichoderus	Wdetritus	Pacetes	Pactinopterygii	Pmollusca	Puca	Ppolychaeta	Pdolichoderus	Pdetritus	Month (4/2020-3/2021)	RGL	Sex	Site	Season	Fish group
1	1.81	6.2	3.3								0	0	0	0	0	0	0	4	0.532258	Female	DHBL	Dry	Immature
2	3.65	7.5	3.1								0	0	0	0	0	0	0	4	0.413333	Female	DHBL	Dry	Mature
3	3.2	7.2	3.3								0	0	0	0	0	0	0	4	0.458333	Female	DHBL	Dry	Mature
4	6.25	8.9	3.6							0.006	0	0	0	0	0	0	1.062	4	0.404494	Female	DHBL	Dry	Mature
5	4.41	8	3.6								0	0	0	0	0	0	0	4	0.45	Female	DHBL	Dry	Mature
6	3.68	7.3	3.4								0	0	0	0	0	0	0	4	0.465753	Female	DHBL	Dry	Mature
7	2.8	7	3.2			0.023					0	0	2.162	0	0	0	0	4	0.457143	Female	DHBL	Dry	Immature
8	2.74	7	3.5	0.0025							0.3275	0	0	0	0	0	0	4	0.5	Female	DHBL	Dry	Immature
9	2.22	6.3	2.5							0.0022	0	0	0	0	0	0	0.3894	4	0.396825	Male	DHBL	Dry	Mature
10	2.87	7.2	2.3								0	0	0	0	0	0	0	4	0.319444	Female	DHBL	Dry	Mature
11	3.28	7.2	2.9						0.001		0	0	0	0	0	0.128	0	4	0.402778	Male	DHBL	Dry	Mature
12	2.09	6.3	2.8								0	0	0	0	0	0	0	4	0.444444	Female	DHBL	Dry	Immature
13	2.55	6.5	2.3								0	0	0	0	0	0	0	4	0.353846	Male	DHBL	Dry	Mature
14	1.69	5.8	3.5							0.0108	0	0	0	0	0	0	1.9116	4	0.603448	Female	DHBL	Dry	Immature
15	2.62	6.9	2.5						0.0018	0.0137	0	0	0	0	0	0.2304	2.4249	4	0.362319	Female	DHBL	Dry	Immature
16	2.18	6.4	2.8						0.0009		0	0	0	0	0	0.1152	0	4	0.4375	Male	DHBL	Dry	Mature
17	1.91	6.2	2.4								0	0	0	0	0	0	0	4	0.387097	Male	DHBL	Dry	Immature
18	1.72	6	2.9								0	0	0	0	0	0	0	4	0.483333	Female	DHBL	Dry	Immature
19	1.96	6.2	2.1								0	0	0	0	0	0	0	4	0.33871	Male	DHBL	Dry	Immature
20	2.11	6.3	2.6						0.002		0	0	0	0	0	0.256	0	4	0.412698	Female	DHBL	Dry	Immature
21	2.18	6.5	2.6								0	0	0	0	0	0	0	4	0.4	Female	DHBL	Dry	Immature
22	1.72	5.9	2.8	0.0019							0.2489	0	0	0	0	0	0	4	0.474576	Female	DHBL	Dry	Immature
23	1.82	6.3	2.5	0.0238							3.1178	0	0	0	0	0	0	4	0.396825	Female	DHBL	Dry	Immature
24	2.27	6.4	3								0	0	0	0	0	0	0	4	0.46875	Female	DHBL	Dry	Immature
25	1.7	6.1	2.6								0	0	0	0	0	0	0	4	0.42623	Female	DHBL	Dry	Immature
26	1.55	5.8	2.6								0	0	0	0	0	0	0	4	0.448276	Male	DHBL	Dry	Immature
27	1.22	5.5	2.1								0	0	0	0	0	0	0	4	0.381818	Female	DHBL	Dry	Immature
28	2.4	6.7	2.2								0	0	0	0	0	0	0	4	0.328358	Female	DHBL	Dry	Immature
29	1.26	5.5	1.8								0	0	0	0	0	0	0	4	0.327273	Male	DHBL	Dry	Immature
30	1.45	5.5	1.6								0	0	0	0	0	0	0	4	0.290909	Male	DHBL	Dry	Immature
31	1.52	5.7	1.8								0	0	0	0	0	0	0	5	0.315789	Female	DHBL	Dry	Immature
32	1.28	5.6	1.8								0	0	0	0	0	0	0	5	0.321429	Male	DHBL	Dry	Immature
33	1.43	5.7	1.9			0.05					0	0	4.7	0	0	0	0	5	0.333333	Male	DHBL	Dry	Immature
34	1.28	5.6	2.1						0.0017		0	0	0	0	0	0.2176	0	5	0.375	Male	DHBL	Dry	Immature
35	1.27	5.5	1.85								0	0	0	0	0	0	0	5	0.336364	Female	DHBL	Dry	Immature
36	1.61	5.8	2							0.0087	0	0	0	0	0	0	1.5399	5	0.344828	Male	DHBL	Dry	Immature
37	1.17	5.4	2.3							0.0113	0	0	0	0	0	0	2.0001	5	0.425926	Male	DHBL	Dry	Immature
38	1.31	5.5	1.8								0	0	0	0	0	0	0	5	0.327273	Male	DHBL	Dry	Immature
39	1.15	5.5	2.3								0	0	0	0	0	0	0	5	0.418182	Male	DHBL	Dry	Immature
40	0.99	5.1	1.7							0.0104	0	0	0	0	0	0	1.8408	5	0.333333	Male	DHBL	Dry	Immature
41	1.03	5.2	2.6								0	0	0	0	0	0	0	5	0.5	Female	DHBL	Dry	Immature
42	0.82	4.9	1.7							0.0146	0	0	0	0	0	0	2.5842	5	0.346939	Female	DHBL	Dry	Immature
43	1.14	5.4	2.5						0.0015		0	0	0	0	0	0.192	0	5	0.462963	Male	DHBL	Dry	Immature
44	1.31	5.6	2.8							0.009	0	0	0	0	0	0	1.593	5	0.5	Female	DHBL	Dry	Immature
45	7.35	9.1	4.6						0.0028		0	0	0	0	0	0.3584	0	5	0.505495	Male	DHBL	Dry	Mature
46	7.87	10	4.7								0	0	0	0	0	0	0	5	0.47	Male	DHBL	Dry	Mature
47	4.35	8.6	4.3								0	0	0	0	0	0	0	5	0.5	Female	DHBL	Dry	Mature
48	6.05	8.8	4.7								0	0	0	0	0	0	0	5	0.534091	Male	DHBL	Dry	Mature
49	7.34	9.4	4.4	0.0524						0.0023	6.8644	0	0	0	0	0	0.4071	5	0.468085	Female	DHBL	Dry	Mature
50	5.18	8.2	3.6						0.0032	0.0025	0	0	0	0	0	0.4096	0.4425	5	0.439024	Female	DHBL	Dry	Immature
51	6.83	9	4.2	0.1845						0.0141	24.1695	0	0	0	0	0	2.4957	6	0.466667	Male	DHBL	Wet	Mature
52	4.07	8.4	3.8								0	0	0	0	0	0	0	6	0.452381	Female	DHBL	Wet	Mature
53	6.77	9.1	4.6							0.0112	0	0	0	0	0	0	1.9824	6	0.505495	Female	DHBL	Wet	Mature
54	11.045	10.6	5	0.1256							16.4536	0	0	0	0	0	0	6	0.471698	Female	DHBL	Wet	Mature
55	5.96	8.6	3.4	0.1276							16.7156	0	0	0	0	0	0	6	0.395349	Male	DHBL	Wet	Mature
56	6.98	9.1	3.8								0	0	0	0	0	0	0	6	0.417582	Male	DHBL	Wet	Mature
57	2.95	7.2	3.6								0	0	0	0	0	0	0	6	0.5	Female	DHBL	Wet	Mature
58	5.02	8.3	4.5		0.0325						0	0.65	0	0	0	0	0	6	0.542169	Female	DHBL	Wet	Mature
59	4.29	8	4.3	0.1571							20.5801	0	0	0	0	0	0	6	0.5375	Male	DHBL	Wet	Mature
60	5	8.1	3.7								0	0	0	0	0	0	0	6	0.45679	Male	DHBL	Wet	Mature
61	8.67	9.6	5.2							0.0072	0	0	0	0	0	0	1.2744	6	0.541667	Male	DHBL	Wet	Mature
62	4.72	8.3	4.3								0	0	0	0	0	0	0	6	0.518072	Female	DHBL	Wet	Mature
63	3.18	7.4	3.7	0.0643							8.4233	0	0	0	0	0	0	6	0.5	Male	DHBL	Wet	Mature
64	5.56	8.6	4.2	0.0067						0.0086	0.8777	0	0	0	0	0	1.5222	6	0.488372	Male	DHBL	Wet	Mature
65	5.41	8.7	3.8							0.0129	0	0	0	0	0	0	2.2833	6	0.436782	Female	DHBL	Wet	Mature
66	3.09	7.4	3.1	0.0524							6.8644	0	0	0	0	0	0	6	0.418919	Female	DHBL	Wet	Mature
67	3.13	7.4	4.1								0	0	0	0	0	0	0	6	0.554054	Female	DHBL	Wet	Mature
68	3.38	7.6	4.8	0.0279						0.0122	3.6549	0	0	0	0	0	2.1594	6	0.631579	Male	DHBL	Wet	Mature
69	3.69	7.6	3.5								0	0	0	0	0	0	0	6	0.460526	Female	DHBL	Wet	Mature
70	2.66	7.2	3.3								0	0	0	0	0	0	0	6	0.458333	Male	DHBL	Wet	Mature
71	2.51	7.1	4.3								0	0	0	0	0	0	0	6	0.605634	Male	DHBL	Wet	Mature
72	7.13	9.4	4.5						0.0156	0.003	0	0	0	0	0	1.9968	0.531	6	0.478723	Male	DHBL	Wet	Mature
73	4.66	8.3	4.2								0	0	0	0	0	0	0	6	0.506024	Male	DHBL	Wet	Mature
74	5.62	8.5	4.5	0.0805							10.5455	0	0	0	0	0	0	6	0.529412	Female	DHBL	Wet	Mature
75	3.62	7.3	4.3							0.0033	0	0	0	0	0	0	0.5841	6	0.589041	Male	DHBL	Wet	Mature
76	3.2	7.4	3.2	0.0174						0.0063	2.2794	0	0	0	0	0	1.1151	6	0.432432	Male	DHBL	Wet	Mature
77	1.82	6	3.5								0	0	0	0	0	0	0	6	0.583333	Female	DHBL	Wet	Immature
78	4.64	7.3	4.2						0.0117		0	0	0	0	0	1.4976	0	6	0.575342	Male	DHBL	Wet	Mature
79	2.89	7.4	3.8							0.0053	0	0	0	0	0	0	0.9381	6	0.513514	Female	DHBL	Wet	Mature
80	3.06	7.3	4.5								0	0	0	0	0	0	0	6	0.616438	Female	DHBL	Wet	Mature
81	5.08	8.4	3.8	0.0542							7.1002	0	0	0	0	0	0	6	0.452381	Female	DHBL	Wet	Mature
82	4.05	7.7	4.3							0.0131	0	0	0	0	0	0	2.3187	6	0.558442	Female	DHBL	Wet	Mature
83	3.07	7.2	3.5								0	0	0	0	0	0	0	6	0.486111	Female	DHBL	Wet	Mature
84	1.58	6	2.6								0	0	0	0	0	0	0	6	0.433333	Male	DHBL	Wet	Immature
85	7.64	9.5	5.6		0.0388						0	0.776	0	0	0	0	0	7	0.589474	Male	DHBL	Wet	Mature
86	6.47	8.9	4.2								0	0	0	0	0	0	0	7	0.47191	Male	DHBL	Wet	Mature
87	4.97	8.5	6.2								0	0	0	0	0	0	0	7	0.729412	Male	DHBL	Wet	Mature
88	7.72	9.3	6.6				0.0971				0	0	0	9.0303	0	0	0	7	0.709677	Female	DHBL	Wet	Mature
89	6.92	8.8	5.7							0.0128	0	0	0	0	0	0	2.2656	7	0.647727	Female	DHBL	Wet	Mature
90	6.64	9.2	6.3								0	0	0	0	0	0	0	7	0.684783	Male	DHBL	Wet	Mature
91	6.13	8.8	7								0	0	0	0	0	0	0	7	0.795455	Female	DHBL	Wet	Mature
92	5.52	8.5	5.5								0	0	0	0	0	0	0	7	0.647059	Female	DHBL	Wet	Mature
93	5.05	8.2	6.4	0.0072							0.9432	0	0	0	0	0	0	7	0.780488	Female	DHBL	Wet	Mature
94	5.62	8.6	5.5								0	0	0	0	0	0	0	7	0.639535	Male	DHBL	Wet	Mature
95	5.54	8.5	5.7								0	0	0	0	0	0	0	7	0.670588	Male	DHBL	Wet	Mature
96	7.56	9.2	6.3							0.0099	0	0	0	0	0	0	1.7523	7	0.684783	Female	DHBL	Wet	Mature
97	6.71	9	7								0	0	0	0	0	0	0	7	0.777778	Female	DHBL	Wet	Mature
98	6.21	8.9	6.8								0	0	0	0	0	0	0	7	0.764045	Female	DHBL	Wet	Mature
99	5.68	8.7	6								0	0	0	0	0	0	0	7	0.689655	Female	DHBL	Wet	Mature
100	6.48	9.2	6.9								0	0	0	0	0	0	0	7	0.75	Female	DHBL	Wet	Mature
101	7.36	9.2	7.3								0	0	0	0	0	0	0	7	0.793478	Female	DHBL	Wet	Mature
102	6.97	9.4	6.3								0	0	0	0	0	0	0	7	0.670213	Female	DHBL	Wet	Mature
103	5.41	8.4	4.2								0	0	0	0	0	0	0	7	0.5	Female	DHBL	Wet	Mature
104	5.04	8.1	5.2								0	0	0	0	0	0	0	7	0.641975	Male	DHBL	Wet	Mature
105	6.7	8.8	6.7								0	0	0	0	0	0	0	7	0.761364	Female	DHBL	Wet	Mature
106	4.09	7.6	5.1							0.0052	0	0	0	0	0	0	0.9204	7	0.671053	Female	DHBL	Wet	Mature
107	5.69	8.3	5.8			0.453					0	0	42.582	0	0	0	0	7	0.698795	Male	DHBL	Wet	Mature
108	4.54	8	4.8								0	0	0	0	0	0	0	7	0.6	Female	DHBL	Wet	Mature
109	3.07	7	4								0	0	0	0	0	0	0	7	0.571429	Female	DHBL	Wet	Immature
110	4.65	8.5	5.3								0	0	0	0	0	0	0	7	0.623529	Male	DHBL	Wet	Mature
111	4.02	7.7	5.5								0	0	0	0	0	0	0	7	0.714286	Male	DHBL	Wet	Mature
112	4.35	8.2	4.8								0	0	0	0	0	0	0	7	0.585366	Male	DHBL	Wet	Mature
113	4.69	8	4.9								0	0	0	0	0	0	0	7	0.6125	Female	DHBL	Wet	Mature
114	2.21	6.5	4								0	0	0	0	0	0	0	7	0.615385	Male	DHBL	Wet	Mature
115	6.5	8.5	6.6							0.0103	0	0	0	0	0	0	1.8231	8	0.776471	Female	DHBL	Wet	Mature
116	4.86	8.1	4.1								0	0	0	0	0	0	0	8	0.506173	Female	DHBL	Wet	Mature
117	2.13	6.3	3.25	0.0386							5.0566	0	0	0	0	0	0	8	0.515873	Male	DHBL	Wet	Mature
118	5.92	8.3	6.15				0.1443				0	0	0	13.4199	0	0	0	8	0.740964	Female	DHBL	Wet	Mature
119	3.25	7.1	4.55	0.0348						0.0079	4.5588	0	0	0	0	0	1.3983	8	0.640845	Female	DHBL	Wet	Mature
120	4.98	7.9	6.05					0.0681		0.0066	0	0	0	0	2.5878	0	1.1682	8	0.765823	Male	DHBL	Wet	Mature
121	4.74	7.7	4.67				0.1086				0	0	0	10.0998	0	0	0	8	0.606494	Male	DHBL	Wet	Mature
122	6.47	8.4	6.45								0	0	0	0	0	0	0	8	0.767857	Female	DHBL	Wet	Mature
123	6.27	8.6	4.5				0.1639				0	0	0	15.2427	0	0	0	8	0.523256	Female	DHBL	Wet	Mature
124	5.2	8.2	7								0	0	0	0	0	0	0	8	0.853659	Male	DHBL	Wet	Mature
125	5.33	8.1	5.6								0	0	0	0	0	0	0	8	0.691358	Male	DHBL	Wet	Mature
126	5.98	8.5	3.4						0.0103		0	0	0	0	0	1.3184	0	8	0.4	Male	DHBL	Wet	Mature
127	6.1	8.8	7				0.0431			0.0046	0	0	0	4.0083	0	0	0.8142	8	0.795455	Male	DHBL	Wet	Mature
128	2.17	4.69	4.1				0.0648		0.0194	0.0045	0	0	0	6.0264	0	2.4832	0.7965	8	0.8742	Female	DHBL	Wet	Immature
129	2.86	6.9	4.5				0.1736				0	0	0	16.1448	0	0	0	8	0.652174	Female	DHBL	Wet	Immature
130	4.42	7.3	7.1				0.1194				0	0	0	11.1042	0	0	0	8	0.972603	Female	DHBL	Wet	Mature
131	4.52	7.6	8.1							0.0114	0	0	0	0	0	0	2.0178	8	1.06579	Male	DHBL	Wet	Mature
132	3.06	7	4.5			0.0632					0	0	5.9408	0	0	0	0	8	0.642857	Male	DHBL	Wet	Mature
133	1.59	6.1	3.1				0.0485				0	0	0	4.5105	0	0	0	8	0.508197	Male	DHBL	Wet	Immature
134	5.83	8.8	5.6				0.0155				0	0	0	1.4415	0	0	0	8	0.636364	Male	DHBL	Wet	Mature
135	2.73	6.8	3.3			0.0319			0.0111		0	0	2.9986	0	0	1.4208	0	8	0.485294	Male	DHBL	Wet	Mature
136	4.99	8.1	5.8								0	0	0	0	0	0	0	8	0.716049	Male	DHBL	Wet	Mature
137	4.28	7.6	4.25			0.0077					0	0	0.7238	0	0	0	0	8	0.559211	Male	DHBL	Wet	Mature
138	5.3	8.2	6.05								0	0	0	0	0	0	0	8	0.737805	Male	DHBL	Wet	Mature
139	4.46	7.4	5.05								0	0	0	0	0	0	0	8	0.682432	Female	DHBL	Wet	Mature
140	3.76	7.4	3.05						0.0029		0	0	0	0	0	0.3712	0	8	0.412162	Female	DHBL	Wet	Mature
141	2.12	6.4	3.15				0.0191				0	0	0	1.7763	0	0	0	8	0.492187	Male	DHBL	Wet	Mature
142	2.92	6.8	2.75			0.0042					0	0	0.3948	0	0	0	0	8	0.404412	Male	DHBL	Wet	Mature
143	6.7	8.7	6.8								0	0	0	0	0	0	0	9	0.781609	Female	DHBL	Wet	Mature
144	4.66	7.9	3.9								0	0	0	0	0	0	0	9	0.493671	Female	DHBL	Wet	Mature
145	2.23	6.4	3.4								0	0	0	0	0	0	0	9	0.53125	Male	DHBL	Wet	Mature
146	5.82	8.1	5.9					0.0079			0	0	0	0	0.3002	0	0	9	0.728395	Female	DHBL	Wet	Mature
147	3.15	6.9	4.3								0	0	0	0	0	0	0	9	0.623188	Male	DHBL	Wet	Mature
148	4.88	7.7	5.8								0	0	0	0	0	0	0	9	0.753247	Female	DHBL	Wet	Mature
149	4.64	7.5	4.42								0	0	0	0	0	0	0	9	0.589333	Male	DHBL	Wet	Mature
150	6.37	8.2	6.2								0	0	0	0	0	0	0	9	0.756098	Female	DHBL	Wet	Mature
151	6.07	8.4	4.3								0	0	0	0	0	0	0	9	0.511905	Female	DHBL	Wet	Mature
152	5	8	6.8								0	0	0	0	0	0	0	9	0.85	Male	DHBL	Wet	Mature
153	5.13	7.9	5.4		0.0257						0	0.514	0	0	0	0	0	9	0.683544	Male	DHBL	Wet	Mature
154	5.78	8.3	3.2								0	0	0	0	0	0	0	9	0.385542	Male	DHBL	Wet	Mature
155	5.9	8.6	6.8								0	0	0	0	0	0	0	9	0.790698	Male	DHBL	Wet	Mature
156	1.97	4.49	3.9								0	0	0	0	0	0	0	9	0.868597	Male	DHBL	Wet	Immature
157	2.66	6.7	4.3					0.0135			0	0	0	0	0.513	0	0	9	0.641791	Male	DHBL	Wet	Mature
158	4.22	7.1	6.9								0	0	0	0	0	0	0	9	0.971831	Female	DHBL	Wet	Mature
159	4.32	7.4	7.9								0	0	0	0	0	0	0	9	1.06757	Male	DHBL	Wet	Mature
160	2.86	6.8	4.3								0	0	0	0	0	0	0	9	0.632353	Male	DHBL	Wet	Mature
161	1.39	5.9	2.9								0	0	0	0	0	0	0	9	0.491525	Male	DHBL	Wet	Immature
162	5.63	8.6	5.4								0	0	0	0	0	0	0	9	0.627907	Male	DHBL	Wet	Mature
163	2.53	6.6	3.1								0	0	0	0	0	0	0	9	0.469697	Male	DHBL	Wet	Mature
164	4.79	7.9	5.6								0	0	0	0	0	0	0	9	0.708861	Female	DHBL	Wet	Mature
165	4.38	7.7	4.4								0	0	0	0	0	0	0	9	0.571429	Male	DHBL	Wet	Mature
166	5.4	8.3	6.2								0	0	0	0	0	0	0	9	0.746988	Male	DHBL	Wet	Mature
167	4.56	7.5	5.2								0	0	0	0	0	0	0	9	0.693333	Male	DHBL	Wet	Mature
168	3.86	7.5	3.2		0.0653						0	1.306	0	0	0	0	0	9	0.426667	Female	DHBL	Wet	Mature
169	2.22	6.5	3.3								0	0	0	0	0	0	0	9	0.507692	Male	DHBL	Wet	Mature
170	3.02	6.9	2.9								0	0	0	0	0	0	0	9	0.42029	Male	DHBL	Wet	Mature
171	5.86	8.4	2.9								0	0	0	0	0	0	0	9	0.345238	Female	DHBL	Wet	Mature
172	6.73	8.8	3.4								0	0	0	0	0	0	0	9	0.386364	Male	DHBL	Wet	Mature
173	7.52	9.2	3.2					0.0891			0	0	0	0	3.3858	0	0	9	0.347826	Female	DHBL	Wet	Mature
174	4.8	8.1	3.9								0	0	0	0	0	0	0	9	0.481481	Male	DHBL	Wet	Mature
175	1.7	5.8	4.1								0	0	0	0	0	0	0	9	0.706897	Male	DHBL	Wet	Immature
176	3.66	7.4	2.9					0.0197			0	0	0	0	0.7486	0	0	9	0.391892	Male	DHBL	Wet	Mature
177	4.96	8.2	4.2								0	0	0	0	0	0	0	9	0.512195	Female	DHBL	Wet	Mature
178	4.93	7.9	2.9							0.0074	0	0	0	0	0	0	1.3098	9	0.367089	Male	DHBL	Wet	Mature
179	3.89	7.3	2.5					0.0243			0	0	0	0	0.9234	0	0	9	0.342466	Female	DHBL	Wet	Mature
180	2.2	6.65	2.6								0	0	0	0	0	0	0	9	0.390977	Female	DHBL	Wet	Immature
181	4.17	7.9	3.4								0	0	0	0	0	0	0	9	0.43038	Female	DHBL	Wet	Mature
182	5.12	8.3	5.1								0	0	0	0	0	0	0	9	0.614458	Male	DHBL	Wet	Mature
183	3.83	7.5	4.9								0	0	0	0	0	0	0	9	0.653333	Male	DHBL	Wet	Mature
184	3.94	7.7	3.6								0	0	0	0	0	0	0	9	0.467532	Female	DHBL	Wet	Mature
185	6.06	8.5	5.8								0	0	0	0	0	0	0	10	0.682353	Female	DHBL	Wet	Mature
186	7.31	9.2	7.2						0.018		0	0	0	0	0	2.304	0	10	0.782609	Female	DHBL	Wet	Mature
187	7.02	9.4	8.4								0	0	0	0	0	0	0	10	0.893617	Female	DHBL	Wet	Mature
188	7.82	8.9	11								0	0	0	0	0	0	0	10	1.23596	Female	DHBL	Wet	Mature
189	5.6	8.4	5								0	0	0	0	0	0	0	10	0.595238	Female	DHBL	Wet	Mature
190	4.74	8.3	6.2								0	0	0	0	0	0	0	10	0.746988	Male	DHBL	Wet	Mature
191	2.59	6.7	4.5								0	0	0	0	0	0	0	10	0.671642	Female	DHBL	Wet	Immature
192	7.18	9.2	7								0	0	0	0	0	0	0	10	0.76087	Male	DHBL	Wet	Mature
193	4.52	7.8	4						0.2349	0.0061	0	0	0	0	0	30.0672	1.0797	10	0.512821	Female	DHBL	Wet	Mature
194	7.23	9.4	8								0	0	0	0	0	0	0	10	0.851064	Male	DHBL	Wet	Mature
195	6.78	8.9	5.8						0.1166		0	0	0	0	0	14.9248	0	10	0.651685	Male	DHBL	Wet	Mature
196	1.25	5.4	3.6								0	0	0	0	0	0	0	10	0.666667	Male	DHBL	Wet	Immature
197	6.35	8.7	8.4								0	0	0	0	0	0	0	10	0.965517	Female	DHBL	Wet	Mature
198	5.47	8.4	6.8				0.0654				0	0	0	6.0822	0	0	0	10	0.809524	Female	DHBL	Wet	Mature
199	5.15	8.1	5								0	0	0	0	0	0	0	10	0.617284	Male	DHBL	Wet	Mature
200	5.76	8.7	6.5								0	0	0	0	0	0	0	10	0.747126	Male	DHBL	Wet	Mature
201	4.25	7.9	6.8								0	0	0	0	0	0	0	11	0.860759	Female	DHBL	Wet	Mature
202	5.59	8.3	3.8								0	0	0	0	0	0	0	11	0.457831	Female	DHBL	Wet	Mature
203	2.93	6.8	5.8								0	0	0	0	0	0	0	11	0.852941	Male	DHBL	Wet	Mature
204	4.84	7.9	5.2								0	0	0	0	0	0	0	11	0.658228	Male	DHBL	Wet	Mature
205	6.34	8.5	7.3								0	0	0	0	0	0	0	11	0.858824	Male	DHBL	Wet	Mature
206	6.44	8.7	5.4				0.0095			0.0028	0	0	0	0.8835	0	0	0.4956	11	0.62069	Female	DHBL	Wet	Mature
207	4.86	7.7	6.8								0	0	0	0	0	0	0	11	0.883117	Male	DHBL	Wet	Mature
208	1.83	6.1	3.2								0	0	0	0	0	0	0	11	0.52459	Female	DHBL	Wet	Immature
209	1.92	6.1	3.6			0.0782					0	0	7.3508	0	0	0	0	11	0.590164	Male	DHBL	Wet	Immature
210	2.96	6.8	4.8								0	0	0	0	0	0	0	11	0.705882	Male	DHBL	Wet	Mature
211	1.85	5.9	4.2							0.0143	0	0	0	0	0	0	2.5311	11	0.711864	Male	DHBL	Wet	Immature
212	1.83	6.1	3.8				0.0205				0	0	0	1.9065	0	0	0	11	0.622951	Female	DHBL	Wet	Immature
213	1.71	5.8	3.2				0.0371				0	0	0	3.4503	0	0	0	11	0.551724	Male	DHBL	Wet	Immature
214	1.56	5.7	3.6								0	0	0	0	0	0	0	11	0.631579	Male	DHBL	Wet	Immature
215	1.37	5.5	3.2							0.0092	0	0	0	0	0	0	1.6284	11	0.581818	Male	DHBL	Wet	Immature
216	1.08	5.3	2.8								0	0	0	0	0	0	0	11	0.528302	Male	DHBL	Wet	Immature
217	1.13	5.2	2.6						0.0148		0	0	0	0	0	1.8944	0	11	0.5	Male	DHBL	Wet	Immature
218	1.26	4.6	2.5							0.0125	0	0	0	0	0	0	2.2125	11	0.543478	Male	DHBL	Wet	Immature
219	1.07	4.9	2.2								0	0	0	0	0	0	0	11	0.44898	Male	DHBL	Wet	Immature
220	8.91	9.6	4.7	0.0089							1.1659	0	0	0	0	0	0	12	0.489583	Female	DHBL	Wet	Mature
221	8.47	8.7	4.4							0.0034	0	0	0	0	0	0	0.6018	12	0.505747	Female	DHBL	Wet	Mature
222	6.14	9	4.25								0	0	0	0	0	0	0	12	0.472222	Male	DHBL	Wet	Mature
223	7.48	8.9	4.75							0.0143	0	0	0	0	0	0	2.5311	12	0.533708	Female	DHBL	Wet	Mature
224	7.26	9.2	4.35						0.0134		0	0	0	0	0	1.7152	0	12	0.472826	Female	DHBL	Wet	Mature
225	6.21	8.9	4.55			0.0207			0.0104		0	0	1.9458	0	0	1.3312	0	12	0.511236	Male	DHBL	Wet	Mature
226	8.53	9.4	3.95	0.0084							1.1004	0	0	0	0	0	0	12	0.420213	Female	DHBL	Wet	Mature
227	5.87	8.9	3.95								0	0	0	0	0	0	0	12	0.44382	Female	DHBL	Wet	Mature
228	8.57	9.6	4.75								0	0	0	0	0	0	0	12	0.494792	Female	DHBL	Wet	Mature
229	6.93	8.8	3.45								0	0	0	0	0	0	0	12	0.392045	Female	DHBL	Wet	Mature
230	9.86	10.1	4.65								0	0	0	0	0	0	0	12	0.460396	Female	DHBL	Wet	Mature
231	5.6	9	4.05								0	0	0	0	0	0	0	12	0.45	Female	DHBL	Wet	Mature
232	7.12	8.9	2.45	0.0048							0.6288	0	0	0	0	0	0	12	0.275281	Female	DHBL	Wet	Mature
233	7.26	9.2	2.85								0	0	0	0	0	0	0	12	0.309783	Female	DHBL	Wet	Mature
234	5.66	8.9	2.85								0	0	0	0	0	0	0	12	0.320225	Female	DHBL	Wet	Mature
235	6.97	8.8	2.35						0.0083		0	0	0	0	0	1.0624	0	12	0.267045	Female	DHBL	Wet	Mature
236	6.05	8.1	3.05				0.0344		0.0045		0	0	0	3.1992	0	0.576	0	12	0.376543	Male	DHBL	Wet	Mature
237	6.4	9.1	2.85								0	0	0	0	0	0	0	12	0.313187	Male	DHBL	Wet	Mature
238	7.65	9.3	2.45						0.0961		0	0	0	0	0	12.3008	0	12	0.263441	Female	DHBL	Wet	Mature
239	6.51	8.3	2.85						0.2396	0.0085	0	0	0	0	0	30.6688	1.5045	12	0.343373	Male	DHBL	Wet	Mature
240	6.37	9.3	2.45						0.0662	0.0073	0	0	0	0	0	8.4736	1.2921	12	0.263441	Male	DHBL	Wet	Mature
241	6.18	8.8	2.8	0.0257							3.3667	0	0	0	0	0	0	12	0.318182	Male	DHBL	Wet	Mature
242	7.79	9.5	5.75	0.0405							5.3055	0	0	0	0	0	0	12	0.605263	Female	DHBL	Wet	Mature
243	7.01	9.4	5.55								0	0	0	0	0	0	0	12	0.590426	Male	DHBL	Wet	Mature
244	9.11	9.8	4.9						0.0088	0.0103	0	0	0	0	0	1.1264	1.8231	1	0.5	Female	DHBL	Dry	Mature
245	8.27	9.5	4.2						0.0489	0.0057	0	0	0	0	0	6.2592	1.0089	1	0.442105	Female	DHBL	Dry	Mature
246	6.24	9.1	4.4								0	0	0	0	0	0	0	1	0.483516	Male	DHBL	Dry	Mature
247	7.38	8.7	4.5						0.0065		0	0	0	0	0	0.832	0	1	0.517241	Female	DHBL	Dry	Mature
248	7.36	9.3	4.5							0.0079	0	0	0	0	0	0	1.3983	1	0.483871	Female	DHBL	Dry	Mature
249	6.31	9	4.7				0.1064				0	0	0	9.8952	0	0	0	1	0.522222	Male	DHBL	Dry	Mature
250	8.63	9.5	4.1						0.0463		0	0	0	0	0	5.9264	0	1	0.431579	Female	DHBL	Dry	Mature
251	5.77	8.7	3.7								0	0	0	0	0	0	0	1	0.425287	Female	DHBL	Dry	Mature
252	8.47	9.4	4.5				0.0761			0.0052	0	0	0	7.0773	0	0	0.9204	1	0.478723	Female	DHBL	Dry	Mature
253	6.83	8.6	3.2								0	0	0	0	0	0	0	1	0.372093	Female	DHBL	Dry	Mature
254	9.76	9.9	4.4						0.0105		0	0	0	0	0	1.344	0	1	0.444444	Female	DHBL	Dry	Mature
255	5.5	8.8	3.8	0.0256						0.0079	3.3536	0	0	0	0	0	1.3983	1	0.431818	Female	DHBL	Dry	Mature
256	7.22	9	2.6							0.0045	0	0	0	0	0	0	0.7965	1	0.288889	Female	DHBL	Dry	Mature
257	7.16	9	2.6	0.2553							33.4443	0	0	0	0	0	0	1	0.288889	Female	DHBL	Dry	Mature
258	5.76	9	3	0.0083							1.0873	0	0	0	0	0	0	1	0.333333	Female	DHBL	Dry	Mature
259	7.07	8.9	2.5							0.0085	0	0	0	0	0	0	1.5045	1	0.280899	Female	DHBL	Dry	Mature
260	6.15	8.2	3.2			0.0214				0.0091	0	0	2.0116	0	0	0	1.6107	1	0.390244	Male	DHBL	Dry	Mature
261	6.3	8.9	2.6								0	0	0	0	0	0	0	1	0.292135	Male	DHBL	Dry	Mature
262	7.55	9.1	2.8						0.0246		0	0	0	0	0	3.1488	0	1	0.307692	Female	DHBL	Dry	Mature
263	6.41	8.1	2.6				0.014				0	0	0	1.302	0	0	0	1	0.320988	Male	DHBL	Dry	Mature
264	6.27	9.1	2.97	0.0129							1.6899	0	0	0	0	0	0	2	0.326374	Male	DHBL	Dry	Mature
265	6.28	8.9	2.3							0.0119	0	0	0	0	0	0	2.1063	2	0.258427	Male	DHBL	Dry	Mature
266	7.69	9.3	5.5								0	0	0	0	0	0	0	2	0.591398	Female	DHBL	Dry	Mature
267	7.11	9.5	5.7	0.0225							2.9475	0	0	0	0	0	0	2	0.6	Male	DHBL	Dry	Mature
268	6.99	8.9	3.2	0.003						0.0088	0.393	0	0	0	0	0	1.5576	2	0.359551	Male	DHBL	Dry	Mature
269	7.07	9.1	4.2								0	0	0	0	0	0	0	2	0.461538	Female	DHBL	Dry	Mature
270	6.08	9.2	3.7			0.0532				0.0127	0	0	5.0008	0	0	0	2.2479	2	0.402174	Male	DHBL	Dry	Mature
271	5.15	8.2	4.7			0.0142					0	0	1.3348	0	0	0	0	2	0.573171	Male	DHBL	Dry	Mature
272	6.43	9.5	5.5						0.0278		0	0	0	0	0	3.5584	0	2	0.578947	Female	DHBL	Dry	Mature
273	3.88	7.6	3.6				0.0676				0	0	0	6.2868	0	0	0	2	0.473684	Female	DHBL	Dry	Mature
274	2.28	6.4	5.6				0.0325				0	0	0	3.0225	0	0	0	2	0.875	Male	DHBL	Dry	Mature
275	2.78	7.1	4.6								0	0	0	0	0	0	0	2	0.647887	Female	DHBL	Dry	Mature
276	2.4	6.9	3.2								0	0	0	0	0	0	0	2	0.463768	Male	DHBL	Dry	Mature
277	2.12	6.5	4.2			0.0134					0	0	1.2596	0	0	0	0	2	0.646154	Male	DHBL	Dry	Mature
278	2.25	6.7	5.1								0	0	0	0	0	0	0	2	0.761194	Female	DHBL	Dry	Immature
279	2.88	7	5.1							0.0091	0	0	0	0	0	0	1.6107	2	0.728571	Female	DHBL	Dry	Immature
280	1.21	5.5	4.1								0	0	0	0	0	0	0	2	0.745455	Female	DHBL	Dry	Immature
281	2.57	7	4.1								0	0	0	0	0	0	0	2	0.585714	Male	DHBL	Dry	Mature
282	1.31	5.6	4.1								0	0	0	0	0	0	0	2	0.732143	Male	DHBL	Dry	Immature
283	1.11	5.3	4.4							0.0063	0	0	0	0	0	0	1.1151	2	0.830189	Male	DHBL	Dry	Immature
284	2.46	6.4	3.2								0	0	0	0	0	0	0	4	0.5	Female	DHTV	Dry	Immature
285	2.38	6.4	2.6			0.0229				0.0061	0	0	2.1526	0	0	0	1.0797	4	0.40625	Male	DHTV	Dry	Immature
286	1.56	5.7	2.7			0.0311					0	0	2.9234	0	0	0	0	4	0.473684	Male	DHTV	Dry	Immature
287	4.62	7.9	4.2				0.0892				0	0	0	8.2956	0	0	0	4	0.531646	Female	DHTV	Dry	Mature
288	1.57	5.8	2.9								0	0	0	0	0	0	0	4	0.5	Female	DHTV	Dry	Immature
289	3.86	7.9	3.7	0.0208							2.7248	0	0	0	0	0	0	4	0.468354	Male	DHTV	Dry	Mature
290	1.5	5.6	2.4							0.0066	0	0	0	0	0	0	1.1682	4	0.428571	Male	DHTV	Dry	Immature
291	1.85	6	2.4						0.0293		0	0	0	0	0	3.7504	0	4	0.4	Female	DHTV	Dry	Immature
292	3.1	6.9	3	0.0568							7.4408	0	0	0	0	0	0	4	0.434783	Male	DHTV	Dry	Immature
293	1.78	5.9	2.5								0	0	0	0	0	0	0	4	0.423729	Male	DHTV	Dry	Immature
294	1.51	5.7	3.4	0.009							1.179	0	0	0	0	0	0	4	0.596491	Male	DHTV	Dry	Immature
295	1.3	5.6	2.2						0.0028		0	0	0	0	0	0.3584	0	4	0.392857	Male	DHTV	Dry	Immature
296	1.65	6	2								0	0	0	0	0	0	0	4	0.333333	Female	DHTV	Dry	Immature
297	1.07	5	2.1	0.0089							1.1659	0	0	0	0	0	0	4	0.42	Male	DHTV	Dry	Immature
298	1.52	5.6	2.3								0	0	0	0	0	0	0	4	0.410714	Male	DHTV	Dry	Immature
299	1.35	5.6	2.9								0	0	0	0	0	0	0	4	0.517857	Male	DHTV	Dry	Immature
300	1.01	5	2.1								0	0	0	0	0	0	0	4	0.42	Male	DHTV	Dry	Immature
301	1.44	5.6	2.5						0.0134		0	0	0	0	0	1.7152	0	4	0.446429	Male	DHTV	Dry	Immature
302	1.57	5.8	3.4			0.0207			0.0104	0.0079	0	0	1.9458	0	0	1.3312	1.3983	4	0.586207	Female	DHTV	Dry	Immature
303	0.78	4.4	2.8	0.0084						0.0045	1.1004	0	0	0	0	0	0.7965	4	0.636364	Female	DHTV	Dry	Immature
304	1.28	5.2	2.8							0.0067	0	0	0	0	0	0	1.1859	4	0.538462	Female	DHTV	Dry	Immature
305	0.95	4.8	2.2							0.0046	0	0	0	0	0	0	0.8142	4	0.458333	Male	DHTV	Dry	Immature
306	1.03	5	2								0	0	0	0	0	0	0	4	0.4	Male	DHTV	Dry	Immature
307	0.66	4.5	1.4								0	0	0	0	0	0	0	4	0.311111	Male	DHTV	Dry	Immature
308	0.77	4.6	1.5								0	0	0	0	0	0	0	4	0.326087	Male	DHTV	Dry	Immature
309	0.84	4.6	1.9	0.0048						0.0085	0.6288	0	0	0	0	0	1.5045	4	0.413043	Male	DHTV	Dry	Immature
310	0.58	4.1	2.8							0.0091	0	0	0	0	0	0	1.6107	4	0.682927	Male	DHTV	Dry	Immature
311	0.4	3.6	2.6								0	0	0	0	0	0	0	4	0.722222	Male	DHTV	Dry	Immature
312	3.85	7.5	3.8						0.0083	0.0085	0	0	0	0	0	1.0624	1.5045	5	0.506667	Male	DHTV	Dry	Mature
313	3.7	7.4	3.5				0.0344		0.0045		0	0	0	3.1992	0	0.576	0	5	0.472973	Male	DHTV	Dry	Mature
314	4.34	7.7	2.4								0	0	0	0	0	0	0	5	0.311688	Male	DHTV	Dry	Mature
315	3.54	7	3.9						0.0961		0	0	0	0	0	12.3008	0	5	0.557143	Female	DHTV	Dry	Immature
316	7.17	8.7	4.5						0.2396	0.0057	0	0	0	0	0	30.6688	1.0089	5	0.517241	Female	DHTV	Dry	Mature
317	3.57	7.2	3.6						0.0662		0	0	0	0	0	8.4736	0	5	0.5	Female	DHTV	Dry	Immature
318	5.19	8	3.3	0.0257							3.3667	0	0	0	0	0	0	5	0.4125	Female	DHTV	Dry	Mature
319	3.96	7.5	4.1	0.0405							5.3055	0	0	0	0	0	0	5	0.546667	Female	DHTV	Dry	Mature
320	2.93	6.9	3.1								0	0	0	0	0	0	0	5	0.449275	Female	DHTV	Dry	Immature
321	3.51	6.7	3.5						0.0088		0	0	0	0	0	1.1264	0	5	0.522388	Male	DHTV	Dry	Immature
322	4.76	7.9	3.4						0.0489		0	0	0	0	0	6.2592	0	5	0.43038	Male	DHTV	Dry	Mature
323	3.55	7	3.1				0.0492			0.0146	0	0	0	4.5756	0	0	2.5842	5	0.442857	Male	DHTV	Dry	Mature
324	2.09	6.4	3.1								0	0	0	0	0	0	0	5	0.484375	Female	DHTV	Dry	Immature
325	3.57	7.3	3.1								0	0	0	0	0	0	0	5	0.424658	Male	DHTV	Dry	Mature
326	2.96	6.9	4								0	0	0	0	0	0	0	5	0.57971	Male	DHTV	Dry	Immature
327	2.82	6.6	3.1								0	0	0	0	0	0	0	5	0.469697	Male	DHTV	Dry	Immature
328	1.87	5.8	3.2						0.025		0	0	0	0	0	3.2	0	5	0.551724	Male	DHTV	Dry	Immature
329	5.24	8.1	4.4	0.0035	0.01						0.4585	0.2	0	0	0	0	0	6	0.54321	Female	DHTV	Wet	Mature
330	5.04	8.4	4.5	0.0025					0.0118		0.3275	0	0	0	0	1.5104	0	6	0.535714	Female	DHTV	Wet	Mature
331	4.39	7.8	3.2				0.0856			0.0025	0	0	0	7.9608	0	0	0.4425	6	0.410256	Female	DHTV	Wet	Mature
332	4.6	7.7	3.8						0.0124		0	0	0	0	0	1.5872	0	6	0.493506	Male	DHTV	Wet	Mature
333	3.76	7.6	4						0.0183		0	0	0	0	0	2.3424	0	6	0.526316	Male	DHTV	Wet	Mature
334	3.91	7.5	5.1						0.0144		0	0	0	0	0	1.8432	0	6	0.68	Female	DHTV	Wet	Mature
335	4.03	7.5	4.5						0.1229	0.0141	0	0	0	0	0	15.7312	2.4957	6	0.6	Female	DHTV	Wet	Mature
336	4.38	8	5	0.0175		0.0348					2.2925	0	3.2712	0	0	0	0	6	0.625	Female	DHTV	Wet	Mature
337	3.73	7.7	4.8			0.0035					0	0	0.329	0	0	0	0	6	0.623377	Female	DHTV	Wet	Mature
338	3.92	7.8	5.2						0.008		0	0	0	0	0	1.024	0	6	0.666667	Female	DHTV	Wet	Mature
339	4.45	8	5.7						0.003	0.01295	0	0	0	0	0	0.384	2.29215	6	0.7125	Female	DHTV	Wet	Mature
340	3.39	7.3	3.4			0.0167					0	0	1.5698	0	0	0	0	6	0.465753	Male	DHTV	Wet	Mature
341	3.18	7.4	4.4								0	0	0	0	0	0	0	6	0.594595	Male	DHTV	Wet	Mature
342	2.61	6.9	4.3	0.0177							2.3187	0	0	0	0	0	0	6	0.623188	Female	DHTV	Wet	Immature
343	3.25	7.3	3.1	0.013		0.0043					1.703	0	0.4042	0	0	0	0	6	0.424658	Female	DHTV	Wet	Immature
344	2.41	6.6	2.8								0	0	0	0	0	0	0	6	0.424242	Male	DHTV	Wet	Immature
345	2.47	6.9	4.3			0.0031					0	0	0.2914	0	0	0	0	6	0.623188	Female	DHTV	Wet	Immature
346	2.2	6.6	3.8	0.007		0.0175					0.917	0	1.645	0	0	0	0	6	0.575758	Female	DHTV	Wet	Immature
347	3.39	7.3	4.4						0.0012		0	0	0	0	0	0.1536	0	6	0.60274	Female	DHTV	Wet	Immature
348	1.64	6.1	3.5	0.0267					0.0078		3.4977	0	0	0	0	0.9984	0	6	0.57377	Female	DHTV	Wet	Immature
349	2.05	6.5	3.6						0.0121	0.0114	0	0	0	0	0	1.5488	2.0178	6	0.553846	Female	DHTV	Wet	Immature
350	1.22	5.6	2.4						0.0084		0	0	0	0	0	1.0752	0	6	0.428571	Male	DHTV	Wet	Immature
351	1.33	5.5	2.6								0	0	0	0	0	0	0	6	0.472727	Male	DHTV	Wet	Immature
352	0.98	5	2.8				0.0018				0	0	0	0.1674	0	0	0	6	0.56	Female	DHTV	Wet	Immature
353	4.7	8.1	5.5							0.0082	0	0	0	0	0	0	1.4514	7	0.679012	Male	DHTV	Wet	Mature
354	8.53	9.5	5.8	0.0714							9.3534	0	0	0	0	0	0	7	0.610526	Female	DHTV	Wet	Mature
355	4.79	7.8	6	0.0148							1.9388	0	0	0	0	0	0	7	0.769231	Male	DHTV	Wet	Mature
356	7.94	9.2	7								0	0	0	0	0	0	0	7	0.76087	Female	DHTV	Wet	Mature
357	7.11	9	6.5			0.0201					0	0	1.8894	0	0	0	0	7	0.722222	Female	DHTV	Wet	Mature
358	6.18	8.6	5.5		0.0315						0	0.63	0	0	0	0	0	7	0.639535	Female	DHTV	Wet	Mature
359	5.79	8.3	3.2								0	0	0	0	0	0	0	7	0.385542	Male	DHTV	Wet	Mature
360	4.66	7.6	5.5						0.0159		0	0	0	0	0	2.0352	0	7	0.723684	Male	DHTV	Wet	Mature
361	4.11	7.8	4			0.0535					0	0	5.029	0	0	0	0	7	0.512821	Female	DHTV	Wet	Mature
362	5.2	7.8	3.5		0.0336						0	0.672	0	0	0	0	0	7	0.448718	Male	DHTV	Wet	Mature
363	6.03	8.7	3								0	0	0	0	0	0	0	7	0.344828	Female	DHTV	Wet	Mature
364	6.74	8.9	4.8								0	0	0	0	0	0	0	7	0.539326	Male	DHTV	Wet	Mature
365	5.05	8.2	6								0	0	0	0	0	0	0	7	0.731707	Male	DHTV	Wet	Mature
366	5.08	8.4	4								0	0	0	0	0	0	0	7	0.47619	Male	DHTV	Wet	Mature
367	1.92	6.3	6.8				0.0186		0.0194		0	0	0	1.7298	0	2.4832	0	7	1.07937	Male	DHTV	Wet	Immature
368	3.54	7.5	5.8								0	0	0	0	0	0	0	7	0.773333	Male	DHTV	Wet	Mature
369	5.36	8.4	6			0.0497				0.0103	0	0	4.6718	0	0	0	1.8231	7	0.714286	Male	DHTV	Wet	Mature
370	1.77	5.8	3.5			0.0325					0	0	3.055	0	0	0	0	7	0.603448	Male	DHTV	Wet	Immature
371	1.12	4.9	2.5							0.0108	0	0	0	0	0	0	1.9116	7	0.510204	Male	DHTV	Wet	Immature
372	0.74	4.5	1.7								0	0	0	0	0	0	0	7	0.377778	Male	DHTV	Wet	Immature
373	1.49	5.7	3.2							0.0137	0	0	0	0	0	0	2.4249	7	0.561404	Female	DHTV	Wet	Immature
374	6.87	9.2	6			0.0981				0.0088	0	0	9.2214	0	0	0	1.5576	8	0.652174	Female	DHTV	Wet	Mature
375	6.56	8.6	6.5								0	0	0	0	0	0	0	8	0.755814	Female	DHTV	Wet	Mature
376	8.91	9.7	7.5				0.0432				0	0	0	4.0176	0	0	0	8	0.773196	Female	DHTV	Wet	Mature
377	7.52	9.4	5.5							0.0028	0	0	0	0	0	0	0.4956	8	0.585106	Female	DHTV	Wet	Mature
378	7.42	9.3	4.3								0	0	0	0	0	0	0	8	0.462366	Male	DHTV	Wet	Mature
379	7.22	8.9	5								0	0	0	0	0	0	0	8	0.561798	Female	DHTV	Wet	Mature
380	6.74	8.7	5.2				0.109				0	0	0	10.137	0	0	0	8	0.597701	Female	DHTV	Wet	Mature
381	8.89	9.8	6.8				0.0187				0	0	0	1.7391	0	0	0	8	0.693878	Female	DHTV	Wet	Mature
382	6.86	8.7	8			0.0167					0	0	1.5698	0	0	0	0	8	0.91954	Female	DHTV	Wet	Mature
383	3.61	7.4	6.2								0	0	0	0	0	0	0	8	0.837838	Female	DHTV	Wet	Mature
384	7.89	8.8	5.1								0	0	0	0	0	0	0	8	0.579545	Female	DHTV	Wet	Mature
385	4.03	7.5	4.6								0	0	0	0	0	0	0	8	0.613333	Female	DHTV	Wet	Mature
386	6.81	8.9	6.4							0.0103	0	0	0	0	0	0	1.8231	8	0.719101	Female	DHTV	Wet	Mature
387	4.89	8.3	5.3		0.0177						0	0.354	0	0	0	0	0	8	0.638554	Female	DHTV	Wet	Mature
388	2.21	6.3	3.2		0.013				0.0043		0	0.26	0	0	0	0.5504	0	8	0.507937	Male	DHTV	Wet	Immature
389	3.46	6.8	4								0	0	0	0	0	0	0	8	0.588235	Male	DHTV	Wet	Immature
390	2.54	6.5	3.8						0.0031		0	0	0	0	0	0.3968	0	8	0.584615	Male	DHTV	Wet	Immature
391	1.81	5.8	2.5	0.007					0.0175		0.917	0	0	0	0	2.24	0	8	0.431034	Male	DHTV	Wet	Immature
392	2.33	6.4	4.1			0.0012					0	0	0.1128	0	0	0	0	8	0.640625	Male	DHTV	Wet	Immature
393	2.27	6.5	3.4	0.0267		0.0078				0.0079	3.4977	0	0.7332	0	0	0	1.3983	8	0.523077	Female	DHTV	Wet	Immature
394	1.34	5.5	2.5			0.0121					0	0	1.1374	0	0	0	0	8	0.454545	Male	DHTV	Wet	Immature
395	8.33	9.3	5.6								0	0	0	0	0	0	0	9	0.602151	Female	DHTV	Wet	Mature
396	4.99	8	6.2								0	0	0	0	0	0	0	9	0.775	Male	DHTV	Wet	Mature
397	7.84	9.1	6.85	0.0175						0.0014	2.2925	0	0	0	0	0	0.2478	9	0.752747	Female	DHTV	Wet	Mature
398	7.21	9.2	6.75								0	0	0	0	0	0	0	9	0.733696	Female	DHTV	Wet	Mature
399	6.08	8.5	5.35			0.0348			0.008		0	0	3.2712	0	0	1.024	0	9	0.629412	Female	DHTV	Wet	Mature
400	5.69	8.2	3.05								0	0	0	0	0	0	0	9	0.371951	Male	DHTV	Wet	Mature
401	4.56	7.5	5.35								0	0	0	0	0	0	0	9	0.713333	Male	DHTV	Wet	Mature
402	4.21	8	4.25							0.0103	0	0	0	0	0	0	1.8231	9	0.53125	Female	DHTV	Wet	Mature
403	5.3	8	3.75	0.0177						0.0086	2.3187	0	0	0	0	0	1.5222	9	0.46875	Male	DHTV	Wet	Mature
404	6.13	8.9	3.25	0.013					0.003	0.0015	1.703	0	0	0	0	0.384	0.2655	9	0.365169	Female	DHTV	Wet	Mature
405	6.84	9.1	5.05								0	0	0	0	0	0	0	9	0.554945	Male	DHTV	Wet	Mature
406	5.15	8.4	6.25								0	0	0	0	0	0	0	9	0.744048	Male	DHTV	Wet	Mature
407	4.98	8.3	3.85	0.007							0.917	0	0	0	0	0	0	9	0.463855	Male	DHTV	Wet	Mature
408	2.02	6.5	7.05						0.0012		0	0	0	0	0	0.1536	0	9	1.08462	Male	DHTV	Wet	Immature
409	3.44	7.4	5.65	0.0267					0.0078		3.4977	0	0	0	0	0.9984	0	9	0.763514	Male	DHTV	Wet	Mature
410	5.26	8.3	5.85						0.0083		0	0	0	0	0	1.0624	0	9	0.704819	Male	DHTV	Wet	Mature
411	1.67	5.7	3.35								0	0	0	0	0	0	0	9	0.587719	Male	DHTV	Wet	Immature
412	1.22	5.1	2.75							0.0072	0	0	0	0	0	0	1.2744	9	0.539216	Male	DHTV	Wet	Immature
413	0.84	4.7	1.95				0.0018				0	0	0	0.1674	0	0	0	9	0.414894	Male	DHTV	Wet	Immature
414	1.59	5.9	3.45							0.0125	0	0	0	0	0	0	2.2125	10	0.584746	Female	DHTV	Wet	Immature
415	6.97	9.4	6.25				0.0344		0.0045	0.0045	0	0	0	3.1992	0	0.576	0.7965	10	0.664894	Female	DHTV	Wet	Mature
416	6.46	8.5	6.35							0.0129	0	0	0	0	0	0	2.2833	10	0.747059	Female	DHTV	Wet	Mature
417	9.01	9.9	7.75						0.0961		0	0	0	0	0	12.3008	0	10	0.782828	Female	DHTV	Wet	Mature
418	7.42	9.3	5.35						0.039		0	0	0	0	0	4.992	0	10	0.575269	Female	DHTV	Wet	Mature
419	7.22	9.1	4.1			0.0035			0.0662		0	0	0.329	0	0	8.4736	0	10	0.450549	Male	DHTV	Wet	Mature
420	7.42	9.1	5.2	0.0257							3.3667	0	0	0	0	0	0	10	0.571429	Female	DHTV	Wet	Mature
421	6.64	8.6	5.05								0	0	0	0	0	0	0	10	0.587209	Female	DHTV	Wet	Mature
422	8.99	10	7.05			0.0167					0	0	1.5698	0	0	0	0	10	0.705	Female	DHTV	Wet	Mature
423	6.76	8.6	7.85						0.0088		0	0	0	0	0	1.1264	0	10	0.912791	Female	DHTV	Wet	Mature
424	3.51	7.3	6.05						0.0489		0	0	0	0	0	6.2592	0	10	0.828767	Female	DHTV	Wet	Immature
425	7.79	8.7	4.95			0.0043					0	0	0.4042	0	0	0	0	10	0.568966	Female	DHTV	Wet	Mature
426	4.13	7.7	4.85								0	0	0	0	0	0	0	10	0.62987	Female	DHTV	Wet	Mature
427	6.91	9.1	6.65			0.0031					0	0	0.2914	0	0	0	0	10	0.730769	Female	DHTV	Wet	Mature
428	4.99	8.5	5.55			0.0175					0	0	1.645	0	0	0	0	10	0.652941	Female	DHTV	Wet	Mature
429	2.31	6.5	3.45								0	0	0	0	0	0	0	10	0.530769	Male	DHTV	Wet	Immature
430	3.56	7	4.25								0	0	0	0	0	0	0	10	0.607143	Male	DHTV	Wet	Mature
431	2.44	6.4	3.65						0.0121		0	0	0	0	0	1.5488	0	11	0.570312	Male	DHTV	Wet	Immature
432	1.91	6	2.75						0.0084	0.0131	0	0	0	0	0	1.0752	2.3187	11	0.458333	Male	DHTV	Wet	Immature
433	2.23	6.3	3.95								0	0	0	0	0	0	0	11	0.626984	Male	DHTV	Wet	Immature
434	2.17	6.4	3.25								0	0	0	0	0	0	0	11	0.507812	Female	DHTV	Wet	Immature
435	1.24	5.4	2.35								0	0	0	0	0	0	0	11	0.435185	Male	DHTV	Wet	Immature
436	2.01	6.3	3.5								0	0	0	0	0	0	0	11	0.555556	Female	DHTV	Wet	Immature
437	3.85	7.6	3.3								0	0	0	0	0	0	0	11	0.434211	Female	DHTV	Wet	Mature
438	3.3	7.4	3.45	0.0405							5.3055	0	0	0	0	0	0	11	0.466216	Female	DHTV	Wet	Mature
439	6.35	9.1	3.75								0	0	0	0	0	0	0	11	0.412088	Female	DHTV	Wet	Mature
440	4.51	8.2	3.75								0	0	0	0	0	0	0	11	0.457317	Female	DHTV	Wet	Mature
441	3.78	7.5	3.55								0	0	0	0	0	0	0	11	0.473333	Female	DHTV	Wet	Mature
442	2.9	7.2	3.35								0	0	0	0	0	0	0	11	0.465278	Female	DHTV	Wet	Immature
443	2.94	7.1	3.7	0.0025							0.3275	0	0	0	0	0	0	11	0.521127	Female	DHTV	Wet	Immature
444	2.42	6.4	2.7								0	0	0	0	0	0	0	11	0.421875	Male	DHTV	Wet	Immature
445	3.07	7.3	2.5								0	0	0	0	0	0	0	11	0.342466	Female	DHTV	Wet	Immature
446	3.48	7.3	3.1					0.001			0	0	0	0	0.038	0	0	11	0.424658	Male	DHTV	Wet	Mature
447	2.29	6.4	3								0	0	0	0	0	0	0	11	0.46875	Female	DHTV	Wet	Immature
448	2.75	6.6	2.5								0	0	0	0	0	0	0	12	0.378788	Male	DHTV	Wet	Immature
449	1.89	5.9	3.7								0	0	0	0	0	0	0	12	0.627119	Female	DHTV	Wet	Immature
450	2.82	7	2.7					0.0018			0	0	0	0	0.0684	0	0	12	0.385714	Female	DHTV	Wet	Immature
451	2.38	6.5	3					0.0009			0	0	0	0	0.0342	0	0	12	0.461538	Male	DHTV	Wet	Immature
452	2.11	6.3	2.6								0	0	0	0	0	0	0	12	0.412698	Male	DHTV	Wet	Immature
453	1.92	6.1	3.1								0	0	0	0	0	0	0	12	0.508197	Female	DHTV	Wet	Immature
454	2.16	6.3	2.3								0	0	0	0	0	0	0	12	0.365079	Male	DHTV	Wet	Immature
455	2.31	6.4	2.8					0.002			0	0	0	0	0.076	0	0	12	0.4375	Female	DHTV	Wet	Immature
456	2.38	6.6	2.8								0	0	0	0	0	0	0	12	0.424242	Female	DHTV	Wet	Immature
457	1.92	6	3	0.0019							0.2489	0	0	0	0	0	0	12	0.5	Female	DHTV	Wet	Immature
458	2.02	6.4	2.7	0.0238							3.1178	0	0	0	0	0	0	12	0.421875	Female	DHTV	Wet	Immature
459	2.47	6.5	3.2								0	0	0	0	0	0	0	12	0.492308	Female	DHTV	Wet	Immature
460	1.9	6.2	2.8								0	0	0	0	0	0	0	12	0.451613	Female	DHTV	Wet	Immature
461	1.75	5.9	2.8								0	0	0	0	0	0	0	12	0.474576	Male	DHTV	Wet	Immature
462	1.42	5.6	2.3								0	0	0	0	0	0	0	12	0.410714	Female	DHTV	Wet	Immature
463	2.6	6.8	2.4								0	0	0	0	0	0	0	12	0.352941	Female	DHTV	Wet	Immature
464	1.46	5.6	2								0	0	0	0	0	0	0	12	0.357143	Male	DHTV	Wet	Immature
465	1.65	5.6	1.8								0	0	0	0	0	0	0	12	0.321429	Male	DHTV	Wet	Immature
466	1.72	5.8	2								0	0	0	0	0	0	0	12	0.344828	Female	DHTV	Wet	Immature
467	1.38	5.8	1.95								0	0	0	0	0	0	0	1	0.336207	Male	DHTV	Dry	Immature
468	1.53	5.9	2.05								0	0	0	0	0	0	0	1	0.347458	Male	DHTV	Dry	Immature
469	1.38	5.8	2.25					0.0017			0	0	0	0	0.0646	0	0	1	0.387931	Male	DHTV	Dry	Immature
470	1.37	5.7	2								0	0	0	0	0	0	0	1	0.350877	Female	DHTV	Dry	Immature
471	1.71	6	2.15								0	0	0	0	0	0	0	1	0.358333	Male	DHTV	Dry	Immature
472	1.27	5.6	2.45								0	0	0	0	0	0	0	1	0.4375	Male	DHTV	Dry	Immature
473	1.41	5.7	1.95								0	0	0	0	0	0	0	1	0.342105	Male	DHTV	Dry	Immature
474	1.25	5.7	2.45								0	0	0	0	0	0	0	1	0.429825	Male	DHTV	Dry	Immature
475	1.09	5.3	1.85								0	0	0	0	0	0	0	1	0.349057	Male	DHTV	Dry	Immature
476	1.13	5.4	2.75								0	0	0	0	0	0	0	1	0.509259	Female	DHTV	Dry	Immature
477	0.92	5.1	1.85								0	0	0	0	0	0	0	1	0.362745	Female	DHTV	Dry	Immature
478	1.24	5.6	2.65					0.0015			0	0	0	0	0.057	0	0	1	0.473214	Male	DHTV	Dry	Immature
479	1.41	5.8	2.95								0	0	0	0	0	0	0	1	0.508621	Female	DHTV	Dry	Immature
480	2.51	6.5	3					0.002			0	0	0	0	0.076	0	0	1	0.461538	Female	DHTV	Dry	Immature
481	2.58	6.7	3								0	0	0	0	0	0	0	1	0.447761	Female	DHTV	Dry	Immature
482	2.12	6.1	3.2	0.0019							0.2489	0	0	0	0	0	0	1	0.52459	Female	DHTV	Dry	Immature
483	2.22	6.5	2.9	0.0238							3.1178	0	0	0	0	0	0	1	0.446154	Female	DHTV	Dry	Immature
484	2.67	6.6	3.4								0	0	0	0	0	0	0	1	0.515152	Female	DHTV	Dry	Immature
485	2.1	6.3	3								0	0	0	0	0	0	0	2	0.47619	Female	DHTV	Dry	Immature
486	1.95	6	3								0	0	0	0	0	0	0	2	0.5	Male	DHTV	Dry	Immature
487	1.62	5.7	2.5								0	0	0	0	0	0	0	2	0.438596	Female	DHTV	Dry	Immature
488	2.8	6.9	2.6								0	0	0	0	0	0	0	2	0.376812	Female	DHTV	Dry	Immature
489	1.66	5.7	2.2								0	0	0	0	0	0	0	2	0.385965	Male	DHTV	Dry	Immature
490	1.85	5.7	2								0	0	0	0	0	0	0	2	0.350877	Male	DHTV	Dry	Immature
491	1.92	5.9	2.2								0	0	0	0	0	0	0	2	0.372881	Female	DHTV	Dry	Immature
492	1.48	6	2.1								0	0	0	0	0	0	0	2	0.35	Male	DHTV	Dry	Immature
493	1.63	6.1	2.2								0	0	0	0	0	0	0	2	0.360656	Male	DHTV	Dry	Immature
494	1.48	6	2.4					0.0017			0	0	0	0	0.0646	0	0	2	0.4	Male	DHTV	Dry	Immature
495	1.47	5.9	2.15								0	0	0	0	0	0	0	2	0.364407	Female	DHTV	Dry	Immature
496	1.81	6.2	2.3								0	0	0	0	0	0	0	2	0.370968	Male	DHTV	Dry	Immature
497	1.37	5.8	2.6								0	0	0	0	0	0	0	2	0.448276	Male	DHTV	Dry	Immature
498	1.51	5.9	2.1								0	0	0	0	0	0	0	2	0.355932	Male	DHTV	Dry	Immature
499	1.35	5.9	2.6								0	0	0	0	0	0	0	2	0.440678	Male	DHTV	Dry	Immature
500	1.19	5.5	2								0	0	0	0	0	0	0	2	0.363636	Male	DHTV	Dry	Immature
501	1.23	5.6	2.9								0	0	0	0	0	0	0	2	0.517857	Female	DHTV	Dry	Immature
502	9.11	10.4	6.6								0	0	0	0	0	0	0	4	0.634615	Female	DDCM	Dry	Mature
503	9.9	10.2	5.1							0.0082	0	0	0	0	0	0	1.4514	4	0.5	Male	DDCM	Dry	Mature
504	5.94	8.9	4.8						0.0009	0.00349	0	0	0	0	0	0.1152	0.61773	4	0.539326	Male	DDCM	Dry	Mature
505	4.46	8	4.7								0	0	0	0	0	0	0	4	0.5875	Male	DDCM	Dry	Immature
506	4.44	7.9	4.1						0.0012		0	0	0	0	0	0.1536	0	4	0.518987	Male	DDCM	Dry	Immature
507	6.16	8.4	5.3								0	0	0	0	0	0	0	4	0.630952	Female	DDCM	Dry	Mature
508	4.12	7.7	4.3								0	0	0	0	0	0	0	4	0.558442	Female	DDCM	Dry	Mature
509	3.53	7.4	4.6								0	0	0	0	0	0	0	4	0.621622	Female	DDCM	Dry	Mature
510	5.94	8.8	5.1								0	0	0	0	0	0	0	4	0.579545	Male	DDCM	Dry	Mature
511	6.8	8.8	5.5								0	0	0	0	0	0	0	4	0.625	Male	DDCM	Dry	Mature
512	4.46	8	4.7								0	0	0	0	0	0	0	4	0.5875	Female	DDCM	Dry	Mature
513	4.1	7.8	2.3								0	0	0	0	0	0	0	4	0.294872	Male	DDCM	Dry	Immature
514	5.22	8.5	5.8							0.0111	0	0	0	0	0	0	1.9647	4	0.682353	Female	DDCM	Dry	Mature
515	3.48	7.5	3.5						0.0031		0	0	0	0	0	0.3968	0	4	0.466667	Female	DDCM	Dry	Mature
516	5.32	8.3	5.8								0	0	0	0	0	0	0	4	0.698795	Female	DDCM	Dry	Mature
517	4.27	7.8	3.2								0	0	0	0	0	0	0	5	0.410256	Male	DDCM	Dry	Immature
518	3.05	7.5	4.2								0	0	0	0	0	0	0	5	0.56	Male	DDCM	Dry	Immature
519	3.79	7.6	3.7							0.0086	0	0	0	0	0	0	1.5222	5	0.486842	Male	DDCM	Dry	Immature
520	4.5	8	4.2							0.0015	0	0	0	0	0	0	0.2655	5	0.525	Male	DDCM	Dry	Immature
521	2.57	6.7	3.1								0	0	0	0	0	0	0	5	0.462687	Female	DDCM	Dry	Immature
522	3.68	7.6	4.5	0.0006				0.0033	0.0089		0.0786	0	0	0	0.1254	1.1392	0	5	0.592105	Female	DDCM	Dry	Mature
523	2.69	7	4						0.0075		0	0	0	0	0	0.96	0	5	0.571429	Male	DDCM	Dry	Immature
524	2.24	6.5	3.3						0.0036		0	0	0	0	0	0.4608	0	5	0.507692	Male	DDCM	Dry	Immature
525	2.89	7.1	3.5								0	0	0	0	0	0	0	5	0.492958	Female	DDCM	Dry	Mature
526	1.6	5.9	3.3							0.0014	0	0	0	0	0	0	0.2478	5	0.559322	Male	DDCM	Dry	Immature
527	1.62	5.9	2.7								0	0	0	0	0	0	0	5	0.457627	Male	DDCM	Dry	Immature
528	1.25	5.7	2.7						0.0006		0	0	0	0	0	0.0768	0	5	0.473684	Female	DDCM	Dry	Immature
529	2.06	6.5	3.4								0	0	0	0	0	0	0	5	0.523077	Male	DDCM	Dry	Immature
530	1.91	6.4	3	0.0051							0.6681	0	0	0	0	0	0	5	0.46875	Male	DDCM	Dry	Immature
531	1.86	5.7	2.6								0	0	0	0	0	0	0	5	0.45614	Female	DDCM	Dry	Immature
532	1.15	5.4	2.9								0	0	0	0	0	0	0	5	0.537037	Male	DDCM	Dry	Immature
533	1.27	5.6	2.7								0	0	0	0	0	0	0	5	0.482143	Female	DDCM	Dry	Immature
534	3.16	7.6	3.9								0	0	0	0	0	0	0	6	0.513158	Female	DDCM	Wet	Mature
535	6.19	8.7	3.8								0	0	0	0	0	0	0	6	0.436782	Male	DDCM	Wet	Mature
536	4.38	8	4.1								0	0	0	0	0	0	0	6	0.5125	Male	DDCM	Wet	Immature
537	8.66	9.8	5.3								0	0	0	0	0	0	0	6	0.540816	Male	DDCM	Wet	Mature
538	3.4	7.5	4.2								0	0	0	0	0	0	0	6	0.56	Male	DDCM	Wet	Immature
539	5.81	8.5	4.5								0	0	0	0	0	0	0	6	0.529412	Male	DDCM	Wet	Immature
540	5.2	8.6	4.2								0	0	0	0	0	0	0	6	0.488372	Female	DDCM	Wet	Mature
541	5.81	8.9	4.6								0	0	0	0	0	0	0	6	0.516854	Female	DDCM	Wet	Mature
542	6.15	8.7	5.2								0	0	0	0	0	0	0	6	0.597701	Female	DDCM	Wet	Mature
543	7.03	9.2	5.1								0	0	0	0	0	0	0	6	0.554348	Female	DDCM	Wet	Mature
544	2.57	6.9	3.8								0	0	0	0	0	0	0	6	0.550725	Female	DDCM	Wet	Mature
545	3.39	7.3	3.6								0	0	0	0	0	0	0	6	0.493151	Female	DDCM	Wet	Mature
546	5.34	8.5	4.3								0	0	0	0	0	0	0	6	0.505882	Female	DDCM	Wet	Mature
547	2.42	6.7	2.9								0	0	0	0	0	0	0	6	0.432836	Male	DDCM	Wet	Immature
548	5.86	8.7	4.6								0	0	0	0	0	0	0	6	0.528736	Female	DDCM	Wet	Mature
549	1.16	5.4	2.8								0	0	0	0	0	0	0	6	0.518519	Male	DDCM	Wet	Immature
550	8	9.5	4.7								0	0	0	0	0	0	0	6	0.494737	Male	DDCM	Wet	Mature
551	4.88	8.3	3.9								0	0	0	0	0	0	0	6	0.46988	Male	DDCM	Wet	Immature
552	6.51	9	4.5								0	0	0	0	0	0	0	6	0.5	Female	DDCM	Wet	Mature
553	7.26	9.3	5								0	0	0	0	0	0	0	6	0.537634	Female	DDCM	Wet	Mature
554	5.59	9.5	4.6								0	0	0	0	0	0	0	6	0.484211	Male	DDCM	Wet	Mature
555	4.19	8	2.9								0	0	0	0	0	0	0	6	0.3625	Male	DDCM	Wet	Immature
556	2.8	7.2	2.8							0.0112	0	0	0	0	0	0	1.9824	6	0.388889	Female	DDCM	Wet	Mature
557	3.72	7.7	3							0.0108	0	0	0	0	0	0	1.9116	6	0.38961	Male	DDCM	Wet	Immature
558	3.99	7.6	3.5								0	0	0	0	0	0	0	6	0.460526	Male	DDCM	Wet	Immature
559	6.24	8.7	6.8								0	0	0	0	0	0	0	7	0.781609	Female	DDCM	Wet	Mature
560	7.52	8.2	5.6				0.0612				0	0	0	5.6916	0	0	0	7	0.682927	Male	DDCM	Wet	Immature
561	6.75	9	4.8		0.0953						0	1.906	0	0	0	0	0	7	0.533333	Male	DDCM	Wet	Mature
562	5.23	7.9	4.9								0	0	0	0	0	0	0	7	0.620253	Female	DDCM	Wet	Mature
563	5.73	8.6	4.5							0.0144	0	0	0	0	0	0	2.5488	7	0.523256	Female	DDCM	Wet	Mature
564	5.04	8.3	4.5								0	0	0	0	0	0	0	7	0.542169	Female	DDCM	Wet	Mature
565	6.97	9.2	5.5								0	0	0	0	0	0	0	7	0.597826	Male	DDCM	Wet	Mature
566	5.01	8.2	5.4							0.0115	0	0	0	0	0	0	2.0355	7	0.658537	Male	DDCM	Wet	Immature
567	4.02	7.7	4.9	0.0412							5.3972	0	0	0	0	0	0	7	0.636364	Female	DDCM	Wet	Mature
568	7.03	9.4	5.4								0	0	0	0	0	0	0	7	0.574468	Female	DDCM	Wet	Mature
569	9.11	9.9	6.6	0.0506						0.00349	6.6286	0	0	0	0	0	0.61773	7	0.666667	Female	DDCM	Wet	Mature
570	6.14	8.9	5.5				0.0449			0.0015	0	0	0	4.1757	0	0	0.2655	7	0.617978	Male	DDCM	Wet	Mature
571	6	8.5	4.3							0.0086	0	0	0	0	0	0	1.5222	7	0.505882	Male	DDCM	Wet	Immature
572	7.69	9.5	4.6	0.0268							3.5108	0	0	0	0	0	0	7	0.484211	Male	DDCM	Wet	Mature
573	6.33	8.5	5.3								0	0	0	0	0	0	0	7	0.623529	Male	DDCM	Wet	Immature
574	4.79	8.1	4.5								0	0	0	0	0	0	0	7	0.555556	Male	DDCM	Wet	Immature
575	7.47	9.2	4.5								0	0	0	0	0	0	0	7	0.48913	Female	DDCM	Wet	Mature
576	6.7	8.7	6.5								0	0	0	0	0	0	0	7	0.747126	Female	DDCM	Wet	Mature
577	6.04	8.9	4.7				0.0991				0	0	0	9.2163	0	0	0	7	0.52809	Male	DDCM	Wet	Mature
578	5.31	8.8	5.7								0	0	0	0	0	0	0	7	0.647727	Male	DDCM	Wet	Mature
579	6.86	9.5	4.1								0	0	0	0	0	0	0	7	0.431579	Male	DDCM	Wet	Mature
580	5.87	8.4	5.4								0	0	0	0	0	0	0	7	0.642857	Female	DDCM	Wet	Mature
581	6	8.8	5							0.0065	0	0	0	0	0	0	1.1505	7	0.568182	Male	DDCM	Wet	Mature
582	5.62	8.5	5.7							0.006	0	0	0	0	0	0	1.062	7	0.670588	Female	DDCM	Wet	Mature
583	4.97	8.5	4								0	0	0	0	0	0	0	7	0.470588	Female	DDCM	Wet	Mature
584	6.16	8.2	6.4								0	0	0	0	0	0	0	7	0.780488	Male	DDCM	Wet	Immature
585	4.3	8	4.4								0	0	0	0	0	0	0	7	0.55	Male	DDCM	Wet	Immature
586	3.51	7.3	5.4				0.0425			0.0131	0	0	0	3.9525	0	0	2.3187	7	0.739726	Female	DDCM	Wet	Mature
587	2.47	6.8	3.3					0.0934			0	0	0	0	3.5492	0	0	7	0.485294	Male	DDCM	Wet	Immature
588	1.67	6	3.5								0	0	0	0	0	0	0	7	0.583333	Female	DDCM	Wet	Immature
589	6.44	8.6	7.8								0	0	0	0	0	0	0	7	0.906977	Female	DDCM	Wet	Mature
590	5.73	8.5	5.1	0.0542							7.1002	0	0	0	0	0	0	8	0.6	Male	DDCM	Wet	Immature
591	4.95	8	3.5								0	0	0	0	0	0	0	8	0.4375	Male	DDCM	Wet	Immature
592	9.53	9.6	7.4								0	0	0	0	0	0	0	8	0.770833	Female	DDCM	Wet	Mature
593	6.17	8.6	6.1				0.0724				0	0	0	6.7332	0	0	0	8	0.709302	Female	DDCM	Wet	Mature
594	4.26	7.9	6.3								0	0	0	0	0	0	0	8	0.797468	Male	DDCM	Wet	Immature
595	6.81	8.9	5.1								0	0	0	0	0	0	0	8	0.573034	Male	DDCM	Wet	Mature
596	3.22	7.5	4.8								0	0	0	0	0	0	0	8	0.64	Male	DDCM	Wet	Immature
597	6.93	8.6	4.2							0.0125	0	0	0	0	0	0	2.2125	8	0.488372	Male	DDCM	Wet	Immature
598	5.51	8.4	5.5				0.0658				0	0	0	6.1194	0	0	0	8	0.654762	Female	DDCM	Wet	Mature
599	3.86	7.5	5.4								0	0	0	0	0	0	0	8	0.72	Male	DDCM	Wet	Immature
600	5.08	7.7	5.5								0	0	0	0	0	0	0	8	0.714286	Female	DDCM	Wet	Mature
601	5.14	8	6.3							0.0086	0	0	0	0	0	0	1.5222	8	0.7875	Female	DDCM	Wet	Mature
602	4.71	8	5.3								0	0	0	0	0	0	0	8	0.6625	Male	DDCM	Wet	Immature
603	5.65	8.6	6.7								0	0	0	0	0	0	0	8	0.77907	Male	DDCM	Wet	Immature
604	4.34	7.6	6.8								0	0	0	0	0	0	0	8	0.894737	Female	DDCM	Wet	Mature
605	4.59	8	6.8							0.0014	0	0	0	0	0	0	0.2478	8	0.85	Male	DDCM	Wet	Immature
606	6.63	8.7	6.7							0.0042	0	0	0	0	0	0	0.7434	8	0.770115	Male	DDCM	Wet	Mature
607	2.34	6.5	5.1							0.0128	0	0	0	0	0	0	2.2656	8	0.784615	Male	DDCM	Wet	Immature
608	1.78	5.8	3.1	0.086						0.0122	11.266	0	0	0	0	0	2.1594	8	0.534483	Male	DDCM	Wet	Immature
609	2.45	6.7	4.5								0	0	0	0	0	0	0	8	0.671642	Male	DDCM	Wet	Immature
610	1.68	6.1	3.4						0.0396	0.0086	0	0	0	0	0	5.0688	1.5222	8	0.557377	Male	DDCM	Wet	Immature
611	7.77	8.9	4.8	0.0377				0.0311			4.9387	0	0	0	1.1818	0	0	9	0.539326	Female	DDCM	Wet	Mature
612	10.28	9.5	8.6				0.0122		0.0402		0	0	0	1.1346	0	5.1456	0	9	0.905263	Female	DDCM	Wet	Mature
613	6.75	8.7	5.2								0	0	0	0	0	0	0	9	0.597701	Male	DDCM	Wet	Mature
614	8.04	8.9	3.8								0	0	0	0	0	0	0	9	0.426966	Female	DDCM	Wet	Mature
615	5.01	7.9	2.6	0.0591							7.7421	0	0	0	0	0	0	9	0.329114	Male	DDCM	Wet	Immature
616	7.93	8.8	3.2	0.0246						0.0113	3.2226	0	0	0	0	0	2.0001	9	0.363636	Male	DDCM	Wet	Mature
617	6.32	8.4	4.3	0.0537						0.0146	7.0347	0	0	0	0	0	2.5842	9	0.511905	Female	DDCM	Wet	Mature
618	6.49	8.6	3.7	0.038							4.978	0	0	0	0	0	0	9	0.430233	Female	DDCM	Wet	Mature
619	7.35	8.9	3.2		0.0859						0	1.718	0	0	0	0	0	9	0.359551	Male	DDCM	Wet	Mature
620	6.05	8.4	5.5	0.1259							16.4929	0	0	0	0	0	0	9	0.654762	Male	DDCM	Wet	Immature
621	6.08	8.5	7				0.0539				0	0	0	5.0127	0	0	0	9	0.823529	Male	DDCM	Wet	Immature
622	6.52	8.6	5.1	0.1384							18.1304	0	0	0	0	0	0	9	0.593023	Female	DDCM	Wet	Mature
623	6.11	8.6	3.5				0.1443			0.0119	0	0	0	13.4199	0	0	2.1063	9	0.406977	Female	DDCM	Wet	Mature
624	6.29	8.4	4.5	0.0348						0.0091	4.5588	0	0	0	0	0	1.6107	9	0.535714	Male	DDCM	Wet	Immature
625	7.02	9.2	3.5					0.0681			0	0	0	0	2.5878	0	0	9	0.380435	Male	DDCM	Wet	Mature
626	5.09	7.8	5.3				0.1086			0.0104	0	0	0	10.0998	0	0	1.8408	9	0.679487	Male	DDCM	Wet	Immature
627	4.84	7.8	4.7								0	0	0	0	0	0	0	9	0.602564	Male	DDCM	Wet	Immature
628	8.3	7.2	2.8				0.0633				0	0	0	5.8869	0	0	0	9	0.388889	Female	DDCM	Wet	Immature
629	4.24	7.6	4.7								0	0	0	0	0	0	0	9	0.618421	Male	DDCM	Wet	Immature
630	6.46	8.4	4	0.0013							0.1703	0	0	0	0	0	0	9	0.47619	Female	DDCM	Wet	Mature
631	3.71	7.5	5.6						0.0116		0	0	0	0	0	1.4848	0	10	0.746667	Female	DDCM	Wet	Mature
632	2.67	7	3.5								0	0	0	0	0	0	0	10	0.5	Male	DDCM	Wet	Immature
633	1.77	6.1	3.65	0.0036							0.4716	0	0	0	0	0	0	10	0.598361	Female	DDCM	Wet	Immature
634	6.54	8.7	7.95	0.0126			0.0123			0.0082	1.6506	0	0	1.1439	0	0	1.4514	10	0.913793	Female	DDCM	Wet	Mature
635	5.83	8.6	5.25								0	0	0	0	0	0	0	10	0.610465	Male	DDCM	Wet	Immature
636	5.05	8.1	3.65			0.0163				0.0053	0	0	1.5322	0	0	0	0.9381	10	0.450617	Male	DDCM	Wet	Immature
637	9.63	9.7	7.55	0.0126						0.009	1.6506	0	0	0	0	0	1.593	10	0.778351	Female	DDCM	Wet	Mature
638	6.37	8.8	6.3								0	0	0	0	0	0	0	10	0.715909	Female	DDCM	Wet	Mature
639	4.46	8.1	6.5	0.0236						0.0143	3.0916	0	0	0	0	0	2.5311	10	0.802469	Male	DDCM	Wet	Immature
640	7.01	9.1	5.3								0	0	0	0	0	0	0	10	0.582418	Male	DDCM	Wet	Mature
641	3.42	7.7	5						0.0112	0.0079	0	0	0	0	0	1.4336	1.3983	10	0.649351	Male	DDCM	Wet	Immature
642	7.13	8.8	4.4				0.0125			0.0135	0	0	0	1.1625	0	0	2.3895	11	0.5	Male	DDCM	Wet	Mature
643	5.71	8.6	5.7							0.0137	0	0	0	0	0	0	2.4249	11	0.662791	Female	DDCM	Wet	Mature
644	4.06	7.7	5.6								0	0	0	0	0	0	0	11	0.727273	Male	DDCM	Wet	Immature
645	5.28	7.9	5.7	0.0021		0.0163				0.0088	0.2751	0	1.5322	0	0	0	1.5576	11	0.721519	Female	DDCM	Wet	Mature
646	5.34	8.2	6.5								0	0	0	0	0	0	0	11	0.792683	Female	DDCM	Wet	Mature
647	4.91	8.2	5.5								0	0	0	0	0	0	0	11	0.670732	Male	DDCM	Wet	Immature
648	5.85	8.8	6.9	0.018						0.0087	2.358	0	0	0	0	0	1.5399	11	0.784091	Male	DDCM	Wet	Mature
649	4.54	7.8	7								0	0	0	0	0	0	0	11	0.897436	Female	DDCM	Wet	Mature
650	4.79	8.2	7				0.0054				0	0	0	0.5022	0	0	0	11	0.853659	Male	DDCM	Wet	Immature
651	6.83	8.9	6.9						0.0085	0.0072	0	0	0	0	0	1.088	1.2744	11	0.775281	Male	DDCM	Wet	Mature
652	2.54	6.7	5.3							0.0125	0	0	0	0	0	0	2.2125	11	0.791045	Male	DDCM	Wet	Immature
653	1.98	6	3.3							0.0122	0	0	0	0	0	0	2.1594	11	0.55	Male	DDCM	Wet	Immature
654	2.65	6.9	4.7							0.0086	0	0	0	0	0	0	1.5222	11	0.681159	Male	DDCM	Wet	Immature
655	1.88	6.3	3.6								0	0	0	0	0	0	0	11	0.571429	Male	DDCM	Wet	Immature
656	7.97	9.1	5								0	0	0	0	0	0	0	11	0.549451	Female	DDCM	Wet	Mature
657	10.48	10.2	8.8	0.0128							1.6768	0	0	0	0	0	0	11	0.862745	Female	DDCM	Wet	Mature
658	6.95	8.9	5.4								0	0	0	0	0	0	0	11	0.606742	Male	DDCM	Wet	Mature
659	8.24	9.1	4	0.0215						0.0113	2.8165	0	0	0	0	0	2.0001	12	0.43956	Female	DDCM	Wet	Mature
660	5.21	8.1	2.8	0.011					0.0069	0.0146	1.441	0	0	0	0	0.8832	2.5842	12	0.345679	Male	DDCM	Wet	Immature
661	8.13	9	3.4	0.0022							0.2882	0	0	0	0	0	0	12	0.377778	Male	DDCM	Wet	Mature
662	6.42	8.5	4.45				0.0124				0	0	0	1.1532	0	0	0	12	0.523529	Female	DDCM	Wet	Mature
663	6.59	8.7	3.85			0.215				0.0119	0	0	20.21	0	0	0	2.1063	12	0.442529	Female	DDCM	Wet	Mature
664	7.45	9	3.35	0.0014						0.0091	0.1834	0	0	0	0	0	1.6107	12	0.372222	Male	DDCM	Wet	Mature
665	6.15	8.5	5.65	0.0089							1.1659	0	0	0	0	0	0	12	0.664706	Male	DDCM	Wet	Immature
666	6.18	8.6	7.15								0	0	0	0	0	0	0	12	0.831395	Male	DDCM	Wet	Immature
667	6.62	8.7	5.25	0.0254						0.0104	3.3274	0	0	0	0	0	1.8408	12	0.603448	Female	DDCM	Wet	Mature
668	6.21	8.7	3.65						0.0102		0	0	0	0	0	1.3056	0	12	0.41954	Female	DDCM	Wet	Mature
669	6.39	8.5	4.65								0	0	0	0	0	0	0	12	0.547059	Male	DDCM	Wet	Immature
670	7.12	9.3	3.65								0	0	0	0	0	0	0	12	0.392473	Male	DDCM	Wet	Mature
671	5.19	7.9	5.45							0.0053	0	0	0	0	0	0	0.9381	12	0.689873	Male	DDCM	Wet	Immature
672	4.94	7.9	4.85	0.0125						0.009	1.6375	0	0	0	0	0	1.593	12	0.613924	Male	DDCM	Wet	Immature
673	8.4	7.2	2.95							0.0143	0	0	0	0	0	0	2.5311	12	0.409722	Female	DDCM	Wet	Mature
674	4.34	7.7	4.85			0.0145					0	0	1.363	0	0	0	0	12	0.62987	Male	DDCM	Wet	Immature
675	10.27	10	4.7						0.0103	0.0111	0	0	0	0	0	1.3184	1.9647	1	0.47	Male	DDCM	Dry	Mature
676	9.17	9.5	3.2				0.0431			0.0079	0	0	0	4.0083	0	0	1.3983	1	0.336842	Female	DDCM	Dry	Mature
677	9.13	9.7	4.3				0.0648		0.0194	0.0137	0	0	0	6.0264	0	2.4832	2.4249	1	0.443299	Male	DDCM	Dry	Mature
678	14.03	10.5	8.2				0.3739			0.0014	0	0	0	34.7727	0	0	0.2478	1	0.780952	Female	DDCM	Dry	Mature
679	8.63	9.3	5.4				0.1194				0	0	0	11.1042	0	0	0	1	0.580645	Female	DDCM	Dry	Mature
680	11.19	10	5.8								0	0	0	0	0	0	0	1	0.58	Female	DDCM	Dry	Mature
681	8.86	9.4	4.3			0.0632					0	0	5.9408	0	0	0	0	1	0.457447	Male	DDCM	Dry	Mature
682	7.79	9.4	4.8				0.0485				0	0	0	4.5105	0	0	0	1	0.510638	Male	DDCM	Dry	Mature
683	6.36	8.5	4.5				0.0155			0.0008	0	0	0	1.4415	0	0	0.1416	1	0.529412	Male	DDCM	Dry	Immature
684	4.68	7	4.3			0.0319			0.0111		0	0	2.9986	0	0	1.4208	0	1	0.614286	Female	DDCM	Dry	Mature
685	3.27	7.5	3.7								0	0	0	0	0	0	0	1	0.493333	Male	DDCM	Dry	Immature
686	1.84	6.3	2.3			0.0077				0.0095	0	0	0.7238	0	0	0	1.6815	1	0.365079	Male	DDCM	Dry	Immature
687	2.01	6.5	3.5							0.0045	0	0	0	0	0	0	0.7965	1	0.538462	Male	DDCM	Dry	Immature
688	1.56	5.84	2.4								0	0	0	0	0	0	0	1	0.410959	Male	DDCM	Dry	Immature
689	1.29	5.4	2.8						0.0029	0.0018	0	0	0	0	0	0.3712	0.3186	1	0.518519	Male	DDCM	Dry	Immature
690	2.52	6.5	2.6				0.0191			0.0012	0	0	0	1.7763	0	0	0.2124	1	0.4	Female	DDCM	Dry	Immature
691	1.32	5.7	3.2			0.0042				0.0111	0	0	0.3948	0	0	0	1.9647	1	0.561404	Male	DDCM	Dry	Immature
692	9.37	9.7	3.4							0.0006	0	0	0	0	0	0	0.1062	2	0.350515	Male	DDCM	Dry	Mature
693	9.33	9.9	4.5						0.0145		0	0	0	0	0	1.856	0	2	0.454545	Female	DDCM	Dry	Mature
694	14.13	10.6	8.35								0	0	0	0	0	0	0	2	0.787736	Female	DDCM	Dry	Mature
695	8.73	9.4	5.55								0	0	0	0	0	0	0	2	0.590426	Female	DDCM	Dry	Mature
696	11.29	10.1	5.95								0	0	0	0	0	0	0	2	0.589109	Male	DDCM	Dry	Mature
697	8.96	9.5	4.45								0	0	0	0	0	0	0	2	0.468421	Male	DDCM	Dry	Mature
698	7.89	9.5	4.95			0.0125				0.0013	0	0	1.175	0	0	0	0.2301	2	0.521053	Male	DDCM	Dry	Mature
699	6.56	8.7	4.7					0.0077			0	0	0	0	0.2926	0	0	2	0.54023	Female	DDCM	Dry	Mature
700	4.88	7.2	4.5								0	0	0	0	0	0	0	2	0.625	Male	DDCM	Dry	Immature
701	3.47	7.2	3.9						0.0078	0.0046	0	0	0	0	0	0.9984	0.8142	2	0.541667	Male	DDCM	Dry	Immature
702	2.04	6.5	2.5							0.0008	0	0	0	0	0	0	0.1416	2	0.384615	Male	DDCM	Dry	Immature
703	2.21	6.7	3.7			0.0155			0.0011	0.0045	0	0	1.457	0	0	0.1408	0.7965	2	0.552239	Male	DDCM	Dry	Immature
704	1.76	6.04	2.6								0	0	0	0	0	0	0	2	0.430464	Male	DDCM	Dry	Immature
705	1.49	5.6	3								0	0	0	0	0	0	0	2	0.535714	Female	DDCM	Dry	Immature
706	2.72	6.7	2.8			0.0478					0	0	4.4932	0	0	0	0	2	0.41791	Male	DDCM	Dry	Immature
707	1.52	5.9	3.4								0	0	0	0	0	0	0	2	0.576271	Male	DDCM	Dry	Immature
708	2.01	6.3	3.5								0	0	0	0	0	0	0	4	0.555556	Female	TDST	Dry	Immature
709	3.85	7.6	3.3						0.0023		0	0	0	0	0	0.2944	0	4	0.434211	Female	TDST	Dry	Mature
710	3.3	7.4	3.45	0.0016			0.01263				0.2096	0	0	1.17459	0	0	0	4	0.466216	Female	TDST	Dry	Mature
711	6.35	9.1	3.75		0.0025						0	0.05	0	0	0	0	0	4	0.412088	Female	TDST	Dry	Mature
712	4.51	8.2	3.75								0	0	0	0	0	0	0	4	0.457317	Female	TDST	Dry	Mature
713	3.78	7.5	3.55								0	0	0	0	0	0	0	4	0.473333	Female	TDST	Dry	Mature
714	2.9	7.2	3.35	0.0078							1.0218	0	0	0	0	0	0	4	0.465278	Female	TDST	Dry	Mature
715	2.94	7.1	3.7			0.0632					0	0	5.9408	0	0	0	0	4	0.521127	Female	TDST	Dry	Mature
716	2.42	6.4	2.7				0.0485				0	0	0	4.5105	0	0	0	4	0.421875	Male	TDST	Dry	Immature
717	3.07	7.3	2.5				0.0155				0	0	0	1.4415	0	0	0	4	0.342466	Female	TDST	Dry	Mature
718	3.48	7.3	3.1			0.0319			0.0111		0	0	2.9986	0	0	1.4208	0	4	0.424658	Male	TDST	Dry	Mature
719	2.29	6.4	3								0	0	0	0	0	0	0	4	0.46875	Female	TDST	Dry	Mature
720	2.75	6.6	2.5			0.0077					0	0	0.7238	0	0	0	0	4	0.378788	Male	TDST	Dry	Mature
721	1.75	5.9	3.7								0	0	0	0	0	0	0	4	0.627119	Female	TDST	Dry	Immature
722	1.42	7	2.7								0	0	0	0	0	0	0	4	0.385714	Female	TDST	Dry	Mature
723	2.6	6.5	3						0.0029		0	0	0	0	0	0.3712	0	4	0.461538	Male	TDST	Dry	Immature
724	1.46	6.3	2.6				0.0191				0	0	0	1.7763	0	0	0	4	0.412698	Male	TDST	Dry	Immature
725	1.65	6.1	3.1			0.0042					0	0	0.3948	0	0	0	0	4	0.508197	Female	TDST	Dry	Immature
726	1.72	6.3	2.3								0	0	0	0	0	0	0	4	0.365079	Male	TDST	Dry	Immature
727	1.38	6.4	2.8						0.0145		0	0	0	0	0	1.856	0	4	0.4375	Female	TDST	Dry	Mature
728	1.53	6.6	2.8								0	0	0	0	0	0	0	5	0.424242	Female	TDST	Dry	Mature
729	1.38	6	3								0	0	0	0	0	0	0	5	0.5	Female	TDST	Dry	Immature
730	1.37	6.4	2.7								0	0	0	0	0	0	0	5	0.421875	Female	TDST	Dry	Mature
731	1.71	6.5	3.2								0	0	0	0	0	0	0	5	0.492308	Female	TDST	Dry	Mature
732	1.89	6.2	2.8			0.0125					0	0	1.175	0	0	0	0	5	0.451613	Female	TDST	Dry	Immature
733	2.82	5.9	2.8					0.0077			0	0	0	0	0.2926	0	0	5	0.474576	Male	TDST	Dry	Immature
734	2.38	5.6	2.3	0.0025							0.3275	0	0	0	0	0	0	5	0.410714	Female	TDST	Dry	Immature
735	2.11	6.8	2.4			0.0242					0	0	2.2748	0	0	0	0	5	0.352941	Female	TDST	Dry	Mature
736	1.92	5.6	2								0	0	0	0	0	0	0	5	0.357143	Male	TDST	Dry	Immature
737	2.16	5.6	1.8						0.001		0	0	0	0	0	0.128	0	5	0.321429	Male	TDST	Dry	Immature
738	2.31	5.8	2								0	0	0	0	0	0	0	5	0.344828	Female	TDST	Dry	Immature
739	2.38	5.8	1.95								0	0	0	0	0	0	0	5	0.336207	Male	TDST	Dry	Immature
740	1.92	5.9	2.05								0	0	0	0	0	0	0	5	0.347458	Male	TDST	Dry	Immature
741	2.02	5.8	2.25						0.0018		0	0	0	0	0	0.2304	0	5	0.387931	Male	TDST	Dry	Immature
742	2.47	5.7	2			0.0448	0.0113		0.0009		0	0	4.2112	1.0509	0	0.1152	0	5	0.350877	Female	TDST	Dry	Immature
743	1.9	6	2.15								0	0	0	0	0	0	0	5	0.358333	Male	TDST	Dry	Immature
744	1.27	5.6	2.45			0.0125					0	0	1.175	0	0	0	0	5	0.4375	Male	TDST	Dry	Immature
745	1.41	5.7	1.95			0.0122					0	0	1.1468	0	0	0	0	5	0.342105	Male	TDST	Dry	Immature
746	1.25	5.7	2.45			0.0086			0.002		0	0	0.8084	0	0	0.256	0	5	0.429825	Male	TDST	Dry	Immature
747	1.09	5.3	1.85								0	0	0	0	0	0	0	5	0.349057	Male	TDST	Dry	Immature
748	1.13	5.4	2.75	0.0019							0.2489	0	0	0	0	0	0	5	0.509259	Female	TDST	Dry	Immature
749	0.92	5.1	1.85	0.0238							3.1178	0	0	0	0	0	0	5	0.362745	Female	TDST	Dry	Immature
750	1.24	5.6	2.65								0	0	0	0	0	0	0	5	0.473214	Male	TDST	Dry	Immature
751	1.41	5.8	2.95			0.0324					0	0	3.0456	0	0	0	0	5	0.508621	Female	TDST	Dry	Immature
752	4.78	8.1	3.8			0.0496					0	0	4.6624	0	0	0	0	6	0.469136	Female	TDST	Wet	Mature
753	6.39	8.5	5.2	0.1073							14.0563	0	0	0	0	0	0	6	0.611765	Female	TDST	Wet	Mature
754	4.98	8.3	4.4						0.0277		0	0	0	0	0	3.5456	0	6	0.53012	Female	TDST	Wet	Mature
755	5.91	8.8	4.5				0.0563				0	0	0	5.2359	0	0	0	6	0.511364	Female	TDST	Wet	Mature
756	4.4	8	4.3			0.0337					0	0	3.1678	0	0	0	0	6	0.5375	Female	TDST	Wet	Mature
757	3.79	7.5	3.9								0	0	0	0	0	0	0	6	0.52	Female	TDST	Wet	Mature
758	4.6	7.7	4.6		0.0154						0	0.308	0	0	0	0	0	6	0.597403	Female	TDST	Wet	Mature
759	4.57	7.8	4	0.0837							10.9647	0	0	0	0	0	0	6	0.512821	Female	TDST	Wet	Mature
760	4.55	8	5.8			0.1518					0	0	14.2692	0	0	0	0	6	0.725	Female	TDST	Wet	Mature
761	6.09	8.8	5.2								0	0	0	0	0	0	0	6	0.590909	Female	TDST	Wet	Mature
762	5.86	8.4	5	0.0714							9.3534	0	0	0	0	0	0	6	0.595238	Female	TDST	Wet	Mature
763	5.11	8.4	5.4	0.0148							1.9388	0	0	0	0	0	0	6	0.642857	Female	TDST	Wet	Mature
764	5.12	8.5	4.9								0	0	0	0	0	0	0	6	0.576471	Female	TDST	Wet	Mature
765	3.78	7.5	4.6			0.0201					0	0	1.8894	0	0	0	0	6	0.613333	Female	TDST	Wet	Mature
766	4.67	8.2	4.4		0.0315						0	0.63	0	0	0	0	0	6	0.536585	Female	TDST	Wet	Mature
767	5.04	8.4	4								0	0	0	0	0	0	0	6	0.47619	Female	TDST	Wet	Mature
768	4.62	7.9	5						0.0159		0	0	0	0	0	2.0352	0	6	0.632911	Female	TDST	Wet	Mature
769	5.41	8.5	3.8			0.3318					0	0	31.1892	0	0	0	0	6	0.447059	Female	TDST	Wet	Mature
770	5.13	8.6	4.2		0.0336						0	0.672	0	0	0	0	0	6	0.488372	Female	TDST	Wet	Mature
771	4.24	7.8	3.8								0	0	0	0	0	0	0	6	0.487179	Female	TDST	Wet	Mature
772	3.3	7.2	4.4								0	0	0	0	0	0	0	6	0.611111	Male	TDST	Wet	Mature
773	4.75	8.4	2.9								0	0	0	0	0	0	0	6	0.345238	Female	TDST	Wet	Mature
774	2.48	6.6	3.8						0.0042		0	0	0	0	0	0.5376	0	6	0.575758	Male	TDST	Wet	Mature
775	6.02	8.4	4.8						0.094		0	0	0	0	0	12.032	0	6	0.571429	Female	TDST	Wet	Mature
776	4.06	7.8	3.9			0.0496					0	0	4.6624	0	0	0	0	6	0.5	Female	TDST	Wet	Mature
777	2.63	6.7	3.5			0.0186	0.0497				0	0	1.7484	4.6221	0	0	0	6	0.522388	Male	TDST	Wet	Mature
778	1.91	6	2.9			0.0325					0	0	3.055	0	0	0	0	6	0.483333	Male	TDST	Wet	Immature
779	1.81	6	3								0	0	0	0	0	0	0	6	0.5	Female	TDST	Wet	Immature
780	3.77	7.2	3.4								0	0	0	0	0	0	0	6	0.472222	Male	TDST	Wet	Mature
781	6.46	8.7	5.2								0	0	0	0	0	0	0	6	0.597701	Female	TDST	Wet	Mature
782	2.79	7.8	3.7								0	0	0	0	0	0	0	6	0.474359	Female	TDST	Wet	Mature
783	4.55	8	5.8			0.059	0.0981				0	0	5.546	9.1233	0	0	0	6	0.725	Female	TDST	Wet	Mature
784	4.12	7.9	4.3				0.0432				0	0	0	4.0176	0	0	0	6	0.544304	Female	TDST	Wet	Mature
785	4.85	8.1	3.9								0	0	0	0	0	0	0	7	0.481481	Female	TDST	Wet	Mature
786	6.09	8.9	3.7								0	0	0	0	0	0	0	7	0.41573	Male	TDST	Wet	Mature
787	6.03	8.7	4.9								0	0	0	0	0	0	0	7	0.563218	Female	TDST	Wet	Mature
788	8.26	8.7	5.2				0.109				0	0	0	10.137	0	0	0	7	0.597701	Female	TDST	Wet	Mature
789	5.36	8.6	4.2				0.0187				0	0	0	1.7391	0	0	0	7	0.488372	Male	TDST	Wet	Mature
790	5.24	8.1	3.6			0.0167				0.012	0	0	1.5698	0	0	0	2.124	7	0.444444	Female	TDST	Wet	Mature
791	6.03	8.4	4.1		0.0223		0.0482				0	0.446	0	4.4826	0	0	0	7	0.488095	Male	TDST	Wet	Mature
792	3.43	7.4	3.7			0.0378					0	0	3.5532	0	0	0	0	7	0.5	Male	TDST	Wet	Mature
793	6.2	8.8	2.6								0	0	0	0	0	0	0	7	0.295455	Male	TDST	Wet	Mature
794	3.22	8.2	2.4			0.0101					0	0	0.9494	0	0	0	0	7	0.292683	Male	TDST	Wet	Mature
795	4.18	8.9	3.9	0.0218							2.8558	0	0	0	0	0	0	7	0.438202	Male	TDST	Wet	Mature
796	6.16	9	3.1								0	0	0	0	0	0	0	7	0.344444	Female	TDST	Wet	Mature
797	3.83	7.5	4.6								0	0	0	0	0	0	0	7	0.613333	Male	TDST	Wet	Mature
798	4.64	8.4	4.7								0	0	0	0	0	0	0	7	0.559524	Female	TDST	Wet	Mature
799	4.13	8.1	5.6			0.0169				0.0125	0	0	1.5886	0	0	0	2.2125	7	0.691358	Male	TDST	Wet	Mature
800	3.6	7.1	3.2					0.2124		0.0012	0	0	0	0	8.0712	0	0.2124	7	0.450704	Male	TDST	Wet	Mature
801	3.98	7.5	5.7			0.0332					0	0	3.1208	0	0	0	0	7	0.76	Female	TDST	Wet	Mature
802	5.03	7.9	3.7							0.0025	0	0	0	0	0	0	0.4425	7	0.468354	Male	TDST	Wet	Mature
803	6.08	8.6	5.2							0.00141	0	0	0	0	0	0	0.24957	7	0.604651	Male	TDST	Wet	Mature
804	3.34	7.3	2							0.0121	0	0	0	0	0	0	2.1417	7	0.273973	Male	TDST	Wet	Mature
805	4.08	8.1	5.1								0	0	0	0	0	0	0	7	0.62963	Male	TDST	Wet	Mature
806	3.51	7.6	4.5	0.0387							5.0697	0	0	0	0	0	0	7	0.592105	Male	TDST	Wet	Mature
807	4.21	7.9	5.9			0.066					0	0	6.204	0	0	0	0	7	0.746835	Male	TDST	Wet	Mature
808	5.48	8.4	5.4				0.0371				0	0	0	3.4503	0	0	0	7	0.642857	Female	TDST	Wet	Mature
809	5.27	8.1	6.4					0.0439			0	0	0	0	1.6682	0	0	7	0.790123	Male	TDST	Wet	Mature
810	5.1	8.2	5.4					0.0404			0	0	0	0	1.5352	0	0	7	0.658537	Male	TDST	Wet	Mature
811	3.37	7.4	3.8					0.0369		0.0125	0	0	0	0	1.4022	0	2.2125	7	0.513514	Female	TDST	Wet	Mature
812	4.44	8.3	4.9				0.0859				0	0	0	7.9887	0	0	0	7	0.590361	Male	TDST	Wet	Mature
813	8.04	9.5	4.8				0.0722				0	0	0	6.7146	0	0	0	8	0.505263	Female	TDST	Wet	Mature
814	4.25	7.5	3.7			0.0328		0.0313			0	0	3.0832	0	1.1894	0	0	8	0.493333	Female	TDST	Wet	Mature
815	5.2	8	4.6	0.074							9.694	0	0	0	0	0	0	8	0.575	Female	TDST	Wet	Mature
816	2.13	6.3	4.2								0	0	0	0	0	0	0	8	0.666667	Male	TDST	Wet	Immature
817	8.98	9.35	6.4				0.1043				0	0	0	9.6999	0	0	0	8	0.684492	Female	TDST	Wet	Mature
818	8.2	9.5	6.2								0	0	0	0	0	0	0	8	0.652632	Female	TDST	Wet	Mature
819	2.25	6.3	4.5			0.0178	0.0243				0	0	1.6732	2.2599	0	0	0	8	0.714286	Male	TDST	Wet	Immature
820	1.83	5.8	3								0	0	0	0	0	0	0	8	0.517241	Male	TDST	Wet	Immature
821	2.5	6.4	4.2				0.0306				0	0	0	2.8458	0	0	0	8	0.65625	Male	TDST	Wet	Immature
822	0.65	4.2	3.6	0.0245							3.2095	0	0	0	0	0	0	8	0.857143	Male	TDST	Wet	Immature
823	6.5	8.5	6.6								0	0	0	0	0	0	0	9	0.776471	Female	TDST	Wet	Mature
824	4.86	8.1	4.1								0	0	0	0	0	0	0	9	0.506173	Male	TDST	Wet	Mature
825	2.13	6.3	3.25					0.0079			0	0	0	0	0.3002	0	0	9	0.515873	Male	TDST	Wet	Immature
826	5.92	8.3	6.15							0.012	0	0	0	0	0	0	2.124	9	0.740964	Male	TDST	Wet	Mature
827	3.25	7.1	4.55								0	0	0	0	0	0	0	9	0.640845	Male	TDST	Wet	Mature
828	4.98	7.9	6.05								0	0	0	0	0	0	0	9	0.765823	Male	TDST	Wet	Mature
829	4.74	7.7	4.67								0	0	0	0	0	0	0	9	0.606494	Male	TDST	Wet	Mature
830	6.47	8.4	6.45								0	0	0	0	0	0	0	9	0.767857	Female	TDST	Wet	Mature
831	6.27	8.6	4.5					0.2576			0	0	0	0	9.7888	0	0	9	0.523256	Male	TDST	Wet	Mature
832	5.2	8.2	7					0.268			0	0	0	0	10.184	0	0	9	0.853659	Male	TDST	Wet	Mature
833	5.33	8.1	5.6		0.0257						0	0.514	0	0	0	0	0	9	0.691358	Male	TDST	Wet	Mature
834	5.98	8.5	3.4								0	0	0	0	0	0	0	9	0.4	Female	TDST	Wet	Mature
835	6.1	8.8	7								0	0	0	0	0	0	0	9	0.795455	Male	TDST	Wet	Mature
836	2.17	4.69	4.1								0	0	0	0	0	0	0	9	0.8742	Male	TDST	Wet	Immature
837	2.86	6.9	4.5				0.0635	0.0135			0	0	0	5.9055	0.513	0	0	9	0.652174	Male	TDST	Wet	Mature
838	4.42	7.3	7.1								0	0	0	0	0	0	0	9	0.972603	Female	TDST	Wet	Mature
839	4.52	7.6	8.1					0.3315			0	0	0	0	12.597	0	0	9	1.06579	Male	TDST	Wet	Mature
840	3.06	7	4.5					0.1478			0	0	0	0	5.6164	0	0	10	0.642857	Female	TDST	Wet	Mature
841	1.59	6.1	3.1								0	0	0	0	0	0	0	10	0.508197	Female	TDST	Wet	Immature
842	5.83	8.8	5.6								0	0	0	0	0	0	0	10	0.636364	Female	TDST	Wet	Mature
843	2.73	6.8	3.3	0.04478							5.86618	0	0	0	0	0	0	10	0.485294	Male	TDST	Wet	Mature
844	4.99	8.1	5.8								0	0	0	0	0	0	0	10	0.716049	Male	TDST	Wet	Mature
845	4.28	7.6	4.25							0.0125	0	0	0	0	0	0	2.2125	10	0.559211	Female	TDST	Wet	Mature
846	5.3	8.2	6.05							0.0012	0	0	0	0	0	0	0.2124	10	0.737805	Male	TDST	Wet	Mature
847	4.46	7.4	5.05					0.04021			0	0	0	0	1.52798	0	0	10	0.682432	Female	TDST	Wet	Mature
848	3.76	7.4	3.05		0.0653						0	1.306	0	0	0	0	0	10	0.412162	Female	TDST	Wet	Mature
849	2.12	6.4	3.15								0	0	0	0	0	0	0	10	0.492187	Male	TDST	Wet	Immature
850	2.92	6.8	2.75								0	0	0	0	0	0	0	10	0.404412	Male	TDST	Wet	Mature
851	5.76	8.3	2.75							0.0025	0	0	0	0	0	0	0.4425	10	0.331325	Female	TDST	Wet	Mature
852	6.63	8.7	3.25	0.1691						0.00141	22.1521	0	0	0	0	0	0.24957	10	0.373563	Female	TDST	Wet	Mature
853	7.42	9.1	3.05				0.017	0.0891			0	0	0	1.581	3.3858	0	0	10	0.335165	Male	TDST	Wet	Mature
854	4.7	8	3.75	0.4185							54.8235	0	0	0	0	0	0	10	0.46875	Male	TDST	Wet	Mature
855	1.6	5.7	3.95								0	0	0	0	0	0	0	10	0.692982	Male	TDST	Wet	Immature
856	3.56	7.3	2.75			0.103		0.0197			0	0	9.682	0	0.7486	0	0	10	0.376712	Male	TDST	Wet	Mature
857	5.06	8.4	4.45								0	0	0	0	0	0	0	10	0.529762	Male	TDST	Wet	Mature
858	1.91	6.3	1.75			0.0402					0	0	3.7788	0	0	0	0	10	0.277778	Female	TDST	Wet	Immature
859	5.03	8.1	3.15					0.0243			0	0	0	0	0.9234	0	0	10	0.388889	Male	TDST	Wet	Mature
860	3.99	7.5	2.75								0	0	0	0	0	0	0	11	0.366667	Male	TDST	Wet	Mature
861	2.3	6.85	3.8			0.3215					0	0	30.221	0	0	0	0	11	0.554745	Male	TDST	Wet	Mature
862	4.27	8.1	3.65								0	0	0	0	0	0	0	11	0.450617	Female	TDST	Wet	Mature
863	5.22	8.5	5.35								0	0	0	0	0	0	0	11	0.629412	Male	TDST	Wet	Mature
864	3.93	7.7	5.15	0.0245							3.2095	0	0	0	0	0	0	11	0.668831	Male	TDST	Wet	Mature
865	4.04	7.9	3.85	0.1203							15.7593	0	0	0	0	0	0	11	0.487342	Female	TDST	Wet	Mature
866	3.23	7.6	2.75						0.018		0	0	0	0	0	2.304	0	11	0.361842	Female	TDST	Wet	Mature
867	6.26	8.7	6								0	0	0	0	0	0	0	11	0.689655	Female	TDST	Wet	Mature
868	7.51	9.4	7.4				0.0602				0	0	0	5.5986	0	0	0	11	0.787234	Male	TDST	Wet	Mature
869	7.12	9.5	8.55								0	0	0	0	0	0	0	11	0.9	Male	TDST	Wet	Mature
870	7.92	9	11.15								0	0	0	0	0	0	0	11	1.23889	Male	TDST	Wet	Mature
871	5.7	8.5	5.15	0.018							2.358	0	0	0	0	0	0	11	0.605882	Female	TDST	Wet	Mature
872	4.84	8.4	6.35								0	0	0	0	0	0	0	11	0.755952	Male	TDST	Wet	Mature
873	2.69	6.8	4.65						0.02349		0	0	0	0	0	3.00672	0	11	0.683824	Female	TDST	Wet	Mature
874	7.38	9.4	7.2								0	0	0	0	0	0	0	11	0.765957	Male	TDST	Wet	Mature
875	4.72	8	4.2						0.1166		0	0	0	0	0	14.9248	0	11	0.525	Male	TDST	Wet	Mature
876	7.43	9.6	8.2								0	0	0	0	0	0	0	11	0.854167	Male	TDST	Wet	Mature
877	6.98	9.1	6								0	0	0	0	0	0	0	11	0.659341	Female	TDST	Wet	Mature
878	1.45	5.6	3.8				0.0654				0	0	0	6.0822	0	0	0	11	0.678571	Male	TDST	Wet	Immature
879	6.55	8.9	8.6						0.1373		0	0	0	0	0	17.5744	0	11	0.966292	Male	TDST	Wet	Mature
880	5.67	8.6	7								0	0	0	0	0	0	0	12	0.813953	Female	TDST	Wet	Mature
881	5.35	8.3	5.2			0.086					0	0	8.084	0	0	0	0	12	0.626506	Male	TDST	Wet	Mature
882	5.96	8.9	6.7							0.006	0	0	0	0	0	0	1.062	12	0.752809	Male	TDST	Wet	Mature
883	4.45	8.1	7						0.1378		0	0	0	0	0	17.6384	0	12	0.864198	Female	TDST	Wet	Mature
884	5.79	8.5	4								0	0	0	0	0	0	0	12	0.470588	Female	TDST	Wet	Mature
885	3.13	7	6								0	0	0	0	0	0	0	12	0.857143	Female	TDST	Wet	Mature
886	5.04	8.1	5.4				0.0095				0	0	0	0.8835	0	0	0	12	0.666667	Female	TDST	Wet	Mature
887	6.54	8.5	7.5		0.0684					0.0131	0	1.368	0	0	0	0	2.3187	12	0.882353	Female	TDST	Wet	Mature
888	6.64	8.9	5.6								0	0	0	0	0	0	0	12	0.629213	Female	TDST	Wet	Mature
889	5.06	7.9	7	0.0391							5.1221	0	0	0	0	0	0	12	0.886076	Female	TDST	Wet	Mature
890	2.03	6.3	3.4								0	0	0	0	0	0	0	12	0.539683	Female	TDST	Wet	Immature
891	2.12	6.3	3.8								0	0	0	0	0	0	0	12	0.603175	Female	TDST	Wet	Immature
892	3.16	7	5				0.0205				0	0	0	1.9065	0	0	0	12	0.714286	Female	TDST	Wet	Mature
893	2.05	6.1	4.4				0.0371				0	0	0	3.4503	0	0	0	12	0.721311	Female	TDST	Wet	Immature
894	2.03	6.3	4								0	0	0	0	0	0	0	12	0.634921	Female	TDST	Wet	Immature
895	1.91	6	3.4								0	0	0	0	0	0	0	12	0.566667	Male	TDST	Wet	Immature
896	1.76	5.9	3.8								0	0	0	0	0	0	0	12	0.644068	Male	TDST	Wet	Immature
897	1.57	5.7	3.4						0.0148		0	0	0	0	0	1.8944	0	12	0.596491	Female	TDST	Wet	Immature
898	1.18	5.4	2.95								0	0	0	0	0	0	0	12	0.546296	Male	TDST	Wet	Immature
899	1.23	5.3	2.75								0	0	0	0	0	0	0	12	0.518868	Male	TDST	Wet	Immature
900	1.36	4.7	2.65	0.0089		0.0326					1.1659	0	3.0644	0	0	0	0	12	0.56383	Male	TDST	Wet	Immature
901	1.17	5	2.35								0	0	0	0	0	0	0	12	0.47	Female	TDST	Wet	Immature
902	9.01	9.7	4.85								0	0	0	0	0	0	0	12	0.5	Male	TDST	Wet	Mature
903	8.57	8.8	4.55								0	0	0	0	0	0	0	1	0.517045	Female	TDST	Dry	Mature
904	6.24	9.1	4.4						0.0134		0	0	0	0	0	1.7152	0	1	0.483516	Male	TDST	Dry	Mature
905	7.58	9	4.9			0.0207			0.0104		0	0	1.9458	0	0	1.3312	0	1	0.544444	Male	TDST	Dry	Mature
906	7.36	9.3	4.5	0.0084							1.1004	0	0	0	0	0	0	1	0.483871	Male	TDST	Dry	Mature
907	6.31	9	4.7								0	0	0	0	0	0	0	1	0.522222	Male	TDST	Dry	Mature
908	8.63	9.5	4.1								0	0	0	0	0	0	0	1	0.431579	Male	TDST	Dry	Mature
909	5.97	9	4.1								0	0	0	0	0	0	0	1	0.455556	Male	TDST	Dry	Mature
910	8.67	9.7	4.9								0	0	0	0	0	0	0	1	0.505155	Female	TDST	Dry	Mature
911	7.03	9	3.7				0.0045				0	0	0	0.4185	0	0	0	1	0.411111	Female	TDST	Dry	Mature
912	9.96	10.3	4.9	0.0048							0.6288	0	0	0	0	0	0	1	0.475728	Male	TDST	Dry	Mature
913	5.7	9.2	4.3								0	0	0	0	0	0	0	1	0.467391	Female	TDST	Dry	Mature
914	7.22	9.1	2.7								0	0	0	0	0	0	0	1	0.296703	Female	TDST	Dry	Mature
915	7.36	9.4	3.1						0.0083		0	0	0	0	0	1.0624	0	1	0.329787	Male	TDST	Dry	Mature
916	5.76	9.1	3.1				0.0344			0.0148	0	0	0	3.1992	0	0	2.6196	1	0.340659	Female	TDST	Dry	Mature
917	7.07	9	2.6					0.0045			0	0	0	0	0.171	0	0	1	0.288889	Female	TDST	Dry	Mature
918	6.15	8.3	3.3						0.0961		0	0	0	0	0	12.3008	0	1	0.39759	Male	TDST	Dry	Mature
919	6.6	9.3	3.05								0	0	0	0	0	0	0	1	0.327957	Female	TDST	Dry	Mature
920	7.85	9.5	2.65						0.0662		0	0	0	0	0	8.4736	0	1	0.278947	Female	TDST	Dry	Mature
921	6.61	8.4	3								0	0	0	0	0	0	0	1	0.357143	Male	TDST	Dry	Mature
922	6.47	9.4	2.6	0.0405							5.3055	0	0	0	0	0	0	1	0.276596	Female	TDST	Dry	Mature
923	6.28	8.9	2.3			0.0932				0.0018	0	0	8.7608	0	0	0	0.3186	1	0.258427	Female	TDST	Dry	Mature
924	7.89	9.6	5.9						0.0088		0	0	0	0	0	1.1264	0	1	0.614583	Female	TDST	Dry	Mature
925	7.11	9.5	5.7						0.0489		0	0	0	0	0	6.2592	0	1	0.6	Female	TDST	Dry	Mature
926	9.31	10	5.1								0	0	0	0	0	0	0	1	0.51	Female	TDST	Dry	Mature
927	8.47	8.7	4.4						0.0065		0	0	0	0	0	0.832	0	1	0.505747	Female	TDST	Dry	Mature
928	6.44	9.3	4.6								0	0	0	0	0	0	0	1	0.494624	Female	TDST	Dry	Mature
929	7.58	8.9	4.7				0.1064				0	0	0	9.8952	0	0	0	2	0.52809	Female	TDST	Dry	Mature
930	7.56	9.5	4.7						0.0463		0	0	0	0	0	5.9264	0	2	0.494737	Female	TDST	Dry	Mature
931	6.51	9.2	4.9							0.0032	0	0	0	0	0	0	0.5664	2	0.532609	Female	TDST	Dry	Mature
932	8.83	9.7	4.3				0.0761				0	0	0	7.0773	0	0	0	2	0.443299	Female	TDST	Dry	Mature
933	5.97	8.9	3.9								0	0	0	0	0	0	0	2	0.438202	Female	TDST	Dry	Mature
934	8.67	9.6	4.7						0.0105		0	0	0	0	0	1.344	0	2	0.489583	Male	TDST	Dry	Mature
935	7.03	8.8	3.4	0.0256							3.3536	0	0	0	0	0	0	2	0.386364	Male	TDST	Dry	Mature
936	9.96	10.1	4.6								0	0	0	0	0	0	0	2	0.455446	Female	TDST	Dry	Mature
937	5.7	9	4	0.02553							3.34443	0	0	0	0	0	0	2	0.444444	Male	TDST	Dry	Mature
938	7.42	9.2	2.8	0.0083							1.0873	0	0	0	0	0	0	2	0.304348	Male	TDST	Dry	Mature
939	7.36	9.2	2.8								0	0	0	0	0	0	0	2	0.304348	Male	TDST	Dry	Mature
940	5.96	9.2	3.2			0.0214					0	0	2.0116	0	0	0	0	2	0.347826	Female	TDST	Dry	Mature
941	7.27	9.1	2.7								0	0	0	0	0	0	0	2	0.296703	Male	TDST	Dry	Mature
942	6.35	8.4	3.4						0.0246		0	0	0	0	0	3.1488	0	2	0.404762	Female	TDST	Dry	Mature
943	6.5	9.1	2.8				0.014				0	0	0	1.302	0	0	0	2	0.307692	Male	TDST	Dry	Mature
944	7.75	9.3	2.8	0.0129							1.6899	0	0	0	0	0	0	2	0.301075	Female	TDST	Dry	Mature
945	6.61	8.3	2.8			0.0532					0	0	5.0008	0	0	0	0	2	0.337349	Male	TDST	Dry	Mature
946	6.47	9.3	2.9			0.0142					0	0	1.3348	0	0	0	0	2	0.311828	Female	TDST	Dry	Mature
947	6.18	8.8	3.12	0.0225							2.9475	0	0	0	0	0	0	2	0.354545	Male	TDST	Dry	Mature
948	7.79	9.5	5.75	0.003			0.0676		0.0278		0.393	0	0	6.2868	0	3.5584	0	2	0.605263	Female	TDST	Dry	Mature
949	7.01	9.4	5.55				0.0325				0	0	0	3.0225	0	0	0	2	0.590426	Female	TDST	Dry	Mature
950	2.66	6.4	2.9			0.023					0	0	2.162	0	0	0	0	3	0.453125	Female	DHBL	Dry	Immature
951	2.6	6.4	3.2	0.0025							0.3275	0	0	0	0	0	0	3	0.5	Female	DHBL	Dry	Immature
952	1.47	5.3	2.3								0	0	0	0	0	0	0	3	0.433962	Male	DHBL	Dry	Immature
953	1.16	5.1	1.9			0.0856					0	0	8.0464	0	0	0	0	3	0.372549	Female	DHBL	Dry	Immature
954	2.28	6.2	2								0	0	0	0	0	0	0	3	0.322581	Female	DHBL	Dry	Immature
955	6.49	8.3	3.8								0	0	0	0	0	0	0	3	0.457831	Male	DHBL	Dry	Mature
956	3.87	7.7	3.4								0	0	0	0	0	0	0	3	0.441558	Female	DHBL	Dry	Mature
957	6.43	8.4	4.1							0.0108	0	0	0	0	0	0	1.9116	3	0.488095	Female	DHBL	Dry	Mature
958	4.42	7.8	4.8								0	0	0	0	0	0	0	3	0.615385	Male	DHBL	Dry	Mature
959	3.82	7.1	5								0	0	0	0	0	0	0	3	0.704225	Male	DHBL	Dry	Mature
960	4.55	7.3	5								0	0	0	0	0	0	0	3	0.684932	Female	DHBL	Dry	Mature
961	4.16	7.1	4								0	0	0	0	0	0	0	3	0.56338	Male	DHBL	Dry	Mature
962	8.46	8.8	4.2	0.0089						0.0079	1.1659	0	0	0	0	0	1.3983	3	0.477273	Female	DHBL	Dry	Mature
963	8.05	8	4								0	0	0	0	0	0	0	3	0.5	Female	DHBL	Dry	Mature
964	4.16	7.4	4.5	0.0175		0.0348				0.0066	2.2925	0	3.2712	0	0	0	1.1682	3	0.608108	Female	DHBL	Dry	Mature
965	3.54	7.1	4.3			0.0035					0	0	0.329	0	0	0	0	3	0.605634	Female	DHBL	Dry	Mature
966	7.5	8.1	4.6								0	0	0	0	0	0	0	3	0.567901	Female	DHBL	Dry	Mature
967	3.83	6.9	4.1								0	0	0	0	0	0	0	3	0.594203	Female	DHBL	Dry	Immature
968	2.19	6	3.1								0	0	0	0	0	0	0	3	0.516667	Male	DHBL	Dry	Immature
969	2.61	6.1	2.3								0	0	0	0	0	0	0	3	0.377049	Male	DHBL	Dry	Immature
970	5.64	8.2	4.3						0.0009		0	0	0	0	0	0.1152	0	3	0.52439	Male	TDST	Dry	Mature
971	6.9	8.6	4.5								0	0	0	0	0	0	0	3	0.523256	Female	TDST	Dry	Mature
972	2.33	6.2	4.1								0	0	0	0	0	0	0	3	0.66129	Male	TDST	Dry	Immature
973	7.5	8.7	4.5			0.0125					0	0	1.175	0	0	0	0	3	0.517241	Male	TDST	Dry	Mature
974	1.07	5	2.5	0.0019							0.2489	0	0	0	0	0	0	3	0.5	Female	TDST	Dry	Immature
975	4.98	7.5	3.2			0.0167					0	0	1.5698	0	0	0	0	3	0.426667	Female	TDST	Dry	Mature
976	5.06	7.5	5		0.0257						0	0.514	0	0	0	0	0	3	0.666667	Male	TDST	Dry	Mature
977	7.52	8.3	10								0	0	0	0	0	0	0	3	1.20482	Male	TDST	Dry	Mature
978	1.12	5	2.7								0	0	0	0	0	0	0	3	0.54	Male	TDST	Dry	Immature
979	5.67	8.2	3.5								0	0	0	0	0	0	0	3	0.426829	Female	TDST	Dry	Mature
980	4.19	7.4	3.2								0	0	0	0	0	0	0	3	0.432432	Female	TDST	Dry	Mature
981	3.5	6.7	3.1								0	0	0	0	0	0	0	3	0.462687	Female	TDST	Dry	Mature
982	0.97	4.9	2.3							0.0045	0	0	0	0	0	0	0.7965	3	0.469388	Female	TDST	Dry	Immature
983	0.77	4.6	1.5								0	0	0	0	0	0	0	3	0.326087	Female	TDST	Dry	Immature
984	2.5	6.8	3								0	0	0	0	0	0	0	3	0.441176	Male	TDST	Dry	Mature
985	2.36	6.7	3.9								0	0	0	0	0	0	0	3	0.58209	Male	TDST	Dry	Mature
986	4.09	7.7	4.3								0	0	0	0	0	0	0	3	0.558442	Male	TDST	Dry	Mature
987	4.41	7.5	4.4								0	0	0	0	0	0	0	3	0.586667	Female	TDST	Dry	Mature
988	2.1	6	3.1								0	0	0	0	0	0	0	3	0.516667	Male	DHTV	Dry	Immature
989	5.47	7.6	5.3					0.0079			0	0	0	0	0.3002	0	0	3	0.697368	Female	DHTV	Dry	Mature
990	2.43	6.3	4.1								0	0	0	0	0	0	0	3	0.650794	Female	DHTV	Dry	Immature
991	6.75	8.6	6.3								0	0	0	0	0	0	0	3	0.732558	Male	DHTV	Dry	Mature
992	1.18	4.3	2.3								0	0	0	0	0	0	0	3	0.534884	Male	DHTV	Dry	Immature
993	1.01	4.6	2								0	0	0	0	0	0	0	3	0.434783	Male	DHTV	Dry	Immature
994	2.14	6	5				0.0325				0	0	0	3.0225	0	0	0	3	0.833333	Male	DHTV	Dry	Immature
995	2.61	6.7	4.1								0	0	0	0	0	0	0	3	0.61194	Female	DHTV	Dry	Immature
996	0.38	3.4	2.4								0	0	0	0	0	0	0	3	0.705882	Male	DHTV	Dry	Immature
997	3.62	7.1	3.4						0.0083		0	0	0	0	0	1.0624	0	3	0.478873	Male	DHTV	Dry	Mature
998	0.92	4.7	2.9				0.0018				0	0	0	0.1674	0	0	0	3	0.617021	Female	DHTV	Dry	Immature
999	4.42	7.6	5								0	0	0	0	0	0	0	3	0.657895	Male	DHTV	Dry	Mature
1000	1.7	5.5	2.3	0.007					0.0175		0.917	0	0	0	0	2.24	0	3	0.418182	Male	DHTV	Dry	Immature
1001	2.19	6	3.7			0.0012					0	0	0.1128	0	0	0	0	3	0.616667	Male	DHTV	Dry	Immature
1002	3.62	7.1	3								0	0	0	0	0	0	0	3	0.422535	Female	DHTV	Dry	Immature
1003	3.1	7	3.1	0.0405							5.3055	0	0	0	0	0	0	3	0.442857	Female	DHTV	Dry	Immature
1004	1.33	5.5	2.7								0	0	0	0	0	0	0	3	0.490909	Female	DHTV	Dry	Immature
1005	2.36	6.1	2.7					0.002			0	0	0	0	0.076	0	0	3	0.442623	Female	DHTV	Dry	Immature
1006	2.87	7.1	3.8								0	0	0	0	0	0	0	3	0.535211	Male	DHTV	Dry	Mature
1007	3.56	7.1	3.3							0.0091	0	0	0	0	0	0	1.6107	3	0.464789	Male	DHTV	Dry	Mature
1008	3.5	7.2	2.7								0	0	0	0	0	0	0	3	0.375	Male	DHTV	Dry	Mature
1009	3.75	7.1	3.2								0	0	0	0	0	0	0	3	0.450704	Male	DDCM	Dry	Immature
1010	6.51	8.1	3.8							0.0015	0	0	0	0	0	0	0.2655	3	0.469136	Male	DDCM	Dry	Immature
1011	5.18	7.9	5				0.0658				0	0	0	6.1194	0	0	0	3	0.632911	Female	DDCM	Dry	Mature
1012	5.99	8.3	5.7								0	0	0	0	0	0	0	3	0.686747	Female	DDCM	Dry	Mature
1013	4.19	7.6	5.9	0.0236							3.0916	0	0	0	0	0	0	3	0.776316	Male	DDCM	Dry	Immature
1014	4.08	7.2	4.4			0.0145					0	0	1.363	0	0	0	0	3	0.611111	Male	DDCM	Dry	Immature
1015	9.65	9.4	4.2						0.0103		0	0	0	0	0	1.3184	0	3	0.446809	Male	DDCM	Dry	Mature
1016	4.24	7.7	3.4								0	0	0	0	0	0	0	3	0.441558	Female	DDCM	Dry	Mature
1017	3.55	7.1	3.2								0	0	0	0	0	0	0	3	0.450704	Female	DDCM	Dry	Mature
1018	1.06	5.1	2.5	0.0019							0.2489	0	0	0	0	0	0	3	0.490196	Female	DDCM	Dry	Immature
1019	0.86	4.8	1.7	0.0238							3.1178	0	0	0	0	0	0	3	0.354167	Female	DDCM	Dry	Immature
1020	7.76	8.2	4.7				0.109				0	0	0	10.137	0	0	0	3	0.573171	Female	DDCM	Dry	Mature
1021	5.04	8.1	3.8				0.0187			0.0051	0	0	0	1.7391	0	0	0.9027	3	0.469136	Male	DDCM	Dry	Immature
1022	4.68	7.4	5.4								0	0	0	0	0	0	0	3	0.72973	Male	DDCM	Dry	Immature
1023	4.46	7.2	4.2								0	0	0	0	0	0	0	3	0.583333	Male	DDCM	Dry	Immature
1024	7.06	8.8	6.7				0.0602				0	0	0	5.5986	0	0	0	3	0.761364	Male	DDCM	Dry	Mature
1025	6.69	8.9	7.7								0	0	0	0	0	0	0	3	0.865169	Male	DDCM	Dry	Mature
1026	5.6	8.4	6							0.0008	0	0	0	0	0	0	0.1416	3	0.714286	Male	DDCM	Dry	Immature
1027	6.92	8.7	4.1	0.0084						0.0013	1.1004	0	0	0	0	0	0.2301	3	0.471264	Male	DDCM	Dry	Mature
1028	5.93	8.5	4.2							0.0015	0	0	0	0	0	0	0.2655	3	0.494118	Male	DDCM	Dry	Immature
1029	6.21	7.9	2.7								0	0	0	0	0	0	0	3	0.341772	Male	DDCM	Dry	Immature
1030	6.11	8.6	2.5				0.014				0	0	0	1.302	0	0	0	3	0.290698	Male	DDCM	Dry	Immature
1031	7.29	8.7	2.6	0.0129							1.6899	0	0	0	0	0	0	3	0.298851	Female	DDCM	Dry	Mature
				Acetes	Actinopterygii	Mollusca	Uca	Polychaeta	Dolichoderus	Detritus
				131	20	94	93	38	128	177
				19.2364	2.93686	13.8032	13.6564	5.58003	18.7959	25.9912
				4.62361	0.7397	4.0152	5.23773	2.02541	3.48039	1.42555
				21.4577	3.43287	18.6341	24.3077	9.39971	16.1521	6.61582
				605.693	14.794	377.429	487.109	76.9656	445.49	252.322
				26.8029	0.654659	16.7018	21.5554	3.40585	19.7137	11.1657

## Sheet: Primver
Pacetes	0	0	0.3275	0	0	0	0	0	0	0.2489	3.1178	0	0	0	0	0	0	0	0	0	6.8644	0	24.1695	0	16.4536	16.7156	0	20.5801	0	8.4233	0.8777	0	6.8644	3.6549	0	10.5455	0	2.2794	0	0	7.1002	0	0	0	0	0.9432	0	0	0
Pactinopterygii	0	0	0	0	0	0	0	0	0	0	0	0	0	0	0	0	0	0	0	0	0	0	0	0	0	0	0.65	0	0	0	0	0	0	0	0	0	0	0	0	0	0	0	0.776	0	0	0	0	0	0
Pmollusca	0	2.162	0	0	0	0	0	0	0	0	0	4.7	0	0	0	0	0	0	0	0	0	0	0	0	0	0	0	0	0	0	0	0	0	0	0	0	0	0	0	0	0	0	0	0	0	0	0	0	42.582
Puca	0	0	0	0	0	0	0	0	0	0	0	0	0	0	0	0	0	0	0	0	0	0	0	0	0	0	0	0	0	0	0	0	0	0	0	0	0	0	0	0	0	0	0	9.0303	0	0	0	0	0
Ppolychaeta	0	0	0	0	0	0	0	0	0	0	0	0	0	0	0	0	0	0	0	0	0	0	0	0	0	0	0	0	0	0	0	0	0	0	0	0	0	0	0	0	0	0	0	0	0	0	0	0	0
Pdolichoderus	0	0	0	0	0.128	0	0.2304	0.1152	0.256	0	0	0	0.2176	0	0	0	0	0.192	0	0.3584	0	0.4096	0	0	0	0	0	0	0	0	0	0	0	0	1.9968	0	0	0	1.4976	0	0	0	0	0	0	0	0	0	0
Pdetritus	1.062	0	0	0.3894	0	1.9116	2.4249	0	0	0	0	0	0	1.5399	2.0001	1.8408	2.5842	0	1.593	0	0.4071	0.4425	2.4957	1.9824	0	0	0	0	1.2744	0	1.5222	2.2833	0	2.1594	0.531	0	0.5841	1.1151	0	0.9381	0	2.3187	0	0	2.2656	0	1.7523	0.9204	0
[truncated: 490 more columns]

## Sheet: Sheet1
TT	GT	GĐ	W	LT	LC	ĐK mắt	KC mắt	Cao thân	Dài đầu	Rộng miệng	W0	Dài ruột	W ruột	W gan	W TSD	WotoL	WotoR	Wtep	Wca	Woc	Wcua	Wgiun	Wkien	Wkhac	WNhện	Wsò	WMùn bả HC	Wtan	W Không TĂ	Ptep	Pca	Poc	Pcua	Pgiun	Pkien	Pkhac				Tháng	DD	Địa điểm	Giới tính	Mua	Thành thục
1	Female	1	1.81	6.2	4.8	0.36	0.1	0.65	1.3	1	1.47	3.3	0.1179	0.0138	0.0054	0.0016	0.0015							0.0207			0.0207	0.0207	0.0972	0	0	0	0	0	0	11.799				4	BL	3	0	1	1
2	Female	1	3.65	7.5	6	0.39	0.05	0.75	1.6	1.2	2.99	3.1	0.1705	0.0324	0.0157	0.0015	0.0019							0.0333			0.0333	0.0333	0.1372	0	0	0	0	0	0	18.981				4	BL	3	0	1	2
3	Female	2	3.2	7.2	5.6	0.35	0.1	0.7	1.15	1.25	2.76	3.3	0.1341	0.0111	0.0124	0.001	0.0015							0.0165			0.0165	0.0165	0.1176	0	0	0	0	0	0	9.405				4	BL	3	0	1	2
4	Female	4	6.25	8.9	6.9	0.38	0.1	0.95	0.95	1.4	4.97	3.6	0.1369	0.0406	0.2502	0.0023	0.0025							0.0112			0.0112	0.0112	0.1257	0	0	0	0	0	0	6.384				4	BL	3	0	1	2
5	Female	2	4.41	8	6.2	0.39	0.08	0.85	1.7	1.4	3.68	3.6	0.1777	0.0245	0.0178	0.0021	0.0021							0.0108			0.0108	0.0108	0.1669	0	0	0	0	0	0	6.156				4	BL	3	0	1	2
6	Female	1	3.68	7.3	5.7	0.32	0.11	0.65	1.55	1.25	2.9	3.4	0.1496	0.0338	0.0145	0.0019	0.002							0.0255			0.0255	0.0255	0.1241	0	0	0	0	0	0	14.535				4	BL	3	0	1	2
7	Female	1	2.8	7	5.5	0.34	0.09	0.65	1.45	1.2	2.29	3.2	0.1148	0.0166	0.0118	0.0018	0.0016							0.0115		0.0115		0.0115	0.1033	0	0	0	0	0	0	6.555				4	BL	3	0	1	1
8	Female	2	2.74	7	5.5	0.35	0.11	0.8	1.45	1.1	2.24	3.5	0.229	0.0221	0.0164	0.0014	0.0013	0.0025						0.0402			0.0402	0.0427	0.1863	0.3275	0	0	0	0	0	22.914				4	BL	3	0	1	1
9	Male	1	2.22	6.3	5.1	0.28	0.09	0.6	1.4	1.05	1.79	2.5	0.1252	0.0133	0.0017	0.0013	0.0014							0.0246			0.0246	0.0246	0.1006	0	0	0	0	0	0	14.022				4	BL	3	1	1	2
10	Female	1	2.87	7.2	5.5	0.35	0.12	0.65	1.4	1.2	2.42	2.3	0.1018	0.0308	0.0091	0.001	0.0017											0	0.1018	0	0	0	0	0	0	0				4	BL	3	0	1	2
11	Male	2	3.28	7.2	5.7	0.38	0.13	0.8	1.45	1.2	2.66	2.9	0.2054	0.0213	0.0012	0.0018	0.0016						0.001	0.0627			0.0627	0.0637	0.1417	0	0	0	0	0	0.157	35.739				4	BL	3	1	1	2
12	Female	1	2.09	6.3	4.9	0.34	0.09	0.8	0.35	1.1	1.71	2.8	0.121	0.0155	0.0054	0.0011	0.0015							0.0224			0.0224	0.0224	0.0986	0	0	0	0	0	0	12.768				4	BL	3	0	1	1
13	Male	2	2.55	6.5	5	0.32	0.09	0.7	1.4	1.2	2.15	2.3	0.1367	0.0305	0.0028	0.0014	0.0013							0.0169			0.0169	0.0169	0.1198	0	0	0	0	0	0	9.633				4	BL	3	1	1	2
14	Female	1	1.69	5.8	4.7	0.31	0.07	0.1	1.25	1.95	1.33	3.5	0.0965	0.0074	0.0059	0.0008	0.0012							0.0254			0.0254	0.0254	0.0711	0	0	0	0	0	0	14.478				4	BL	3	0	1	1
15	Female	2	2.62	6.9	5.4	0.32	0.12	0.7	1.5	1.1	2.21	2.5	0.1303	0.016	0.007	0.001	0.0012						0.0018	0.006			0.006	0.0078	0.1225	0	0	0	0	0	0.2826	3.42				4	BL	3	0	1	1
16	Male	2	2.18	6.4	5	0.3	0.11	0.65	1.35	1.1	1.68	2.8	0.1361	0.035	0.0019	0.0019	0.0014						0.0009	0.0235			0.0235	0.0244	0.1117	0	0	0	0	0	0.1413	13.395				4	BL	3	1	1	2
17	Male	1	1.91	6.2	4.8	0.3	0.11	0.65	1.55	1.05	1.55	2.4	0.1019	0.0248	0.0025	0.001	0.0014							0.0131			0.0131	0.0131	0.0888	0	0	0	0	0	0	7.467				4	BL	3	1	1	1
18	Female	1	1.72	6	4.6	0.3	0.1	0.65	1.3	0.95	1.39	2.9	0.1099	0.0158	0.0076	0.0012	0.001							0.0221			0.0221	0.0221	0.0878	0	0	0	0	0	0	12.597				4	BL	3	0	1	1
19	Male	2	1.96	6.2	5	0.28	0.12	0.65	1.35	1.1	1.56	2.1	0.103	0.019	0.0018	0.0012	0.0013							0.0162			0.0162	0.0162	0.0868	0	0	0	0	0	0	9.234				4	BL	3	1	1	1
20	Female	1	2.11	6.3	4.9	0.35	0.13	0.75	1.25	1.1	1.62	2.6	0.1157	0.0163	0.0142	0.0009	0.001						0.002	0.0125			0.0125	0.0145	0.1012	0	0	0	0	0	0.314	7.125				4	BL	3	0	1	1
21	Female	1	2.18	6.5	5.1	0.32	0.13	0.65	1.45	1.1	1.82	2.6	0.1144	0.0217	0.0079	0.0011	0.0013							0.0122			0.0122	0.0122	0.1022	0	0	0	0	0	0	6.954				4	BL	3	0	1	1
22	Female	1	1.72	5.9	4.7	0.33	0.12	0.5	1.25	1.05	1.39	2.8	0.0946	0.0075	0.0069	0.0012	0.0011	0.0019						0.0086			0.0086	0.0105	0.0841	0.2489	0	0	0	0	0	4.902				4	BL	3	0	1	1
23	Female	1	1.82	6.3	5	0.29	0.08	0.65	1.3	1.05	1.47	2.5	0.1347	0.0196	0.0054	0.0012	0.001	0.0238										0.0238	0.1109	3.1178	0	0	0	0	0	0				4	BL	3	0	1	1
24	Female	1	2.27	6.4	5	0.33	0.11	0.75	1.4	1.05	1.77	3	0.1538	0.0315	0.0089	0.0014	0.0012							0.0361			0.0361	0.0361	0.1177	0	0	0	0	0	0	20.577				4	BL	3	0	1	1
25	Female	1	1.7	6.1	4.7	0.3	0.12	0.55	1.2	0.95	1.37	2.6	0.0937	0.0119	0.0053	0.0013	0.001							0.0113			0.0113	0.0113	0.0824	0	0	0	0	0	0	6.441				4	BL	3	0	1	1
26	Male	2	1.55	5.8	4.4	0.31	0.07	0.6	1.25	1	1.24	2.6	0.096	0.0171	0.0023	0.0014	0.001							0.0146			0.0146	0.0146	0.0814	0	0	0	0	0	0	8.322				4	BL	3	1	1	1
27	Female	1	1.22	5.5	4.4	0.3	0.11	0.55	1.15	0.95	0.96	2.1	0.0658	0.0077	0.0033	0.0011	0.0008							0.0167			0.0167	0.0167	0.0491	0	0	0	0	0	0	9.519				4	BL	3	0	1	1
28	Female	1	2.4	6.7	5.3	0.36	0.09	0.65	1.3	1.15	1.93	2.2	0.1178	0.0198	0.0068	0.0013	0.0009							0.0151			0.0151	0.0151	0.1027	0	0	0	0	0	0	8.607				4	BL	3	0	1	1
29	Male	1	1.26	5.5	4.2	0.3	0.08	0.55	1.05	0.9	1.04	1.8	0.0746	0.0083	0.0027	0.0007	0.001							0.0119			0.0119	0.0119	0.0627	0	0	0	0	0	0	6.783				4	BL	3	1	1	1
30	Male	2	1.45	5.5	4.3	0.28	0.1	0.55	1.05	0.95	1.19	1.6	0.085	0.0201	0.0044	0.0008	0.0009							0.0091			0.0091	0.0091	0.0759	0	0	0	0	0	0	5.187				4	BL	3	1	1	1
31	Female	1	1.52	5.7	4.5	0.3	0.08	0.6	1.15	0.95	1.31	1.8	0.0784	0.0148	0.0078	0.0009	0.001							0.0202			0.0202	0.0202	0.0582	0	0	0	0	0	0	11.514				5	BL	3	0	1	1
32	Male	1	1.28	5.6	4.5	0.29	0.09	0.5	1.2	0.9	1.06	1.8	0.1762	0.0111	0.0076	0.001	0.0012							0.0104			0.0104	0.0104	0.1658	0	0	0	0	0	0	5.928				5	BL	3	1	1	1
33	Male	1	1.43	5.7	4.4	0.28	0.09	0.65	1.15	0.95	1.17	1.9	0.0622	0.0042	0.0012	0.0008	0.0012							0.025		0.025		0.025	0.0372	0	0	0	0	0	0	14.25				5	BL	3	1	1	1
34	Male	1	1.28	5.6	4.4	0.28	0.11	0.6	1.25	1	1.07	2.1	0.1	0.008	0.0038	0.0009	0.0011						0.0017	0.0151			0.0151	0.0168	0.0832	0	0	0	0	0	0.2669	8.607				5	BL	3	1	1	1
35	Female	1	1.27	5.5	4.3	0.3	0.09	0.55	1.2	1	1.03	1.85	0.0636	0.0048	0.0053	0.0007	0.0012							0.0162			0.0162	0.0162	0.0474	0	0	0	0	0	0	9.234				5	BL	3	0	1	1
36	Male	2	1.61	5.8	4.5	0.25	0.05	0.5	1.3	1.05	1.34	2	0.0499	0.0091	0.0059	0.0009	0.0009							0.0053			0.0053	0.0053	0.0446	0	0	0	0	0	0	3.021				5	BL	3	1	1	1
37	Male	1	1.17	5.4	4.1	0.31	0.07	0.1	1.1	0.85	1.09	2.3	0.0564	0.0089	0.001	0.0012	0.0009							0.009			0.009	0.009	0.0474	0	0	0	0	0	0	5.13				5	BL	3	1	1	1
38	Male	2	1.31	5.5	4.4	0.3	0.05	0.6	1.25	0.9	0.98	1.8	0.0745	0.0155	0.0039	0.0006	0.0005							0.0143			0.0143	0.0143	0.0602	0	0	0	0	0	0	8.151				5	BL	3	1	1	1
39	Male	1	1.15	5.5	4.2	0.3	0.05	0.5	1.05	0.85	0.96	2.3	0.0439	0.0096	0.0026	0.001	0.0012							0.0255			0.0255	0.0255	0.0184	0	0	0	0	0	0	14.535				5	BL	3	1	1	1
40	Male	1	0.99	5.1	4	0.25	0.008	0.5	1.05	0.9	0.84	1.7	0.0783	0.008	0.0022	0.0007	0.0009							0.0079			0.0079	0.0079	0.0704	0	0	0	0	0	0	4.503				5	BL	3	1	1	1
41	Female	2	1.03	5.2	4.3	0.35	0.08	0.45	1.15	0.95	0.85	2.6	0.052	0.0097	0.0059	0.0007	0.0011							0.0137			0.0137	0.0137	0.0383	0	0	0	0	0	0	7.809				5	BL	3	0	1	1
42	Female	1	0.82	4.9	3.8	0.23	0.07	0.5	1.05	0.8	0.67	1.7	0.0972	0.0033	0.0057	0.0004	0.0007							0.0088			0.0088	0.0088	0.0884	0	0	0	0	0	0	5.016				5	BL	3	0	1	1
43	Male	1	1.14	5.4	4.2	0.28	0.09	0.55	1.25	0.95	0.93	2.5	0.0695	0.014	0.0043	0.0009	0.0007						0.0015	0.0087			0.0087	0.0102	0.0593	0	0	0	0	0	0.2355	4.959				5	BL	3	1	1	1
44	Female	1	1.31	5.6	4.2	0.31	0.12	0.5	1.25	1.05	0.99	2.8	0.0566	0.0143	0.0074	0.0006	0.0011							0.0072			0.0072	0.0072	0.0494	0	0	0	0	0	0	4.104				5	BL	3	0	1	1
45	Male	3	7.35	9.1	7.2	0.4	0.13	1.15	2.05	1.15	6.52	4.6	0.1957	0.0998	0.0168	0.0037	0.0037						0.0028	0.0063			0.0063	0.0091	0.1866	0	0	0	0	0	0.4396	3.591				5	BL	3	1	1	2
46	Male	3	7.87	10	8.2	0.52	0.2	1.15	2.15	1.3	7.01	4.7	0.2573	0.1016	0.0126	0.0043	0.0046											0	0.2573	0	0	0	0	0	0	0				5	BL	3	1	1	2
47	Female	1	4.35	8.6	6.9	0.5	0.2	0.7	2	1	3.75	4.3	0.1752	0.0506	0.0335	0.0021	0.0017							0.0166			0.0166	0.0166	0.1586	0	0	0	0	0	0	9.462				5	BL	3	0	1	2
48	Male	3	6.05	8.8	7.2	0.47	0.23	1.05	2	1.25	5.37	4.7	0.3152	0.0573	0.0121	0.0031	0.0028							0.1474			0.1474	0.1474	0.1678	0	0	0	0	0	0	84.018				5	BL	3	1	1	2
49	Female	3	7.34	9.4	7.6	0.4	0.21	1.15	2.05	1.2	6.12	4.4	0.4303	0.1771	0.2177	0.0033	0.0034	0.0524						0.0246			0.0246	0.077	0.3533	6.8644	0	0	0	0	0	14.022				5	BL	3	0	1	2
50	Female	4	5.18	6.2	6.6	0.46	0.14	0.9	1.7	1.1	4.15	3.6	0.2081	0.0775	0.3977	0.0026	0.0025						0.0032	0.003			0.003	0.0062	0.2019	0	0	0	0	0	0.5024	1.71				5	BL	3	0	1	1
51	Male	4	6.83	9	7.4	0.45	0.13	1.04	2	1.2	6.03	4.2	0.2305	0.1319	0.028	0.0034	0.0031	0.1845						0.0025			0.0025	0.187	0.0435	24.1695	0	0	0	0	0	1.425				6	BL	3	1	2	2
52	Female	1	4.07	8.4	6.6	0.44	0.22	0.85	1.75	1.15	3.59	3.8	0.1382	0.0982	0.032	0.0028	0.0032							0.0198			0.0198	0.0198	0.1184	0	0	0	0	0	0	11.286				6	BL	3	0	2	2
53	Female	4	6.77	9.1	7.2	0.45	0.18	1.1	1.8	1.2	5.87	4.6	0.2323	0.2054	0.2756	0.0025	0.0024							0.0141			0.0141	0.0141	0.2182	0	0	0	0	0	0	8.037				6	BL	3	0	2	2
54	Female	3	11.045	10.6	8.4	0.52	0.25	1.4	2.2	1.2	9.72	5	0.4757	0.1149	0.1045	0.0045	0.0046	0.1256						0.0264			0.0264	0.152	0.3237	16.4536	0	0	0	0	0	15.048				6	BL	3	0	2	2
55	Male	4	5.96	8.6	7.2	0.43	0.2	1.05	1.85	1.15	5.12	3.4	0.3356	0.3365	0.0338	0.0013	0.0017	0.1276										0.1276	0.208	16.7156	0	0	0	0	0	0				6	BL	3	1	2	2
56	Male	4	6.98	9.1	7.2	0.43	0.29	1.1	1.95	1.35	6.08	3.8	0.2002	0.0722	0.0359	0.0025	0.0027							0.0162			0.0162	0.0162	0.184	0	0	0	0	0	0	9.234				6	BL	3	1	2	2
57	Female	1	2.95	7.2	5.8	0.35	0.1	0.85	1.4	0.85	2.43	3.6	0.2576	0.2228	0.0065	0.0018	0.0015							0.1677			0.1677	0.1677	0.0899	0	0	0	0	0	0	95.589				6	BL	3	0	2	2
58	Female	2	5.02	8.3	6.6	0.4	0.19	0.95	1.8	1.15	4.15	4.5	0.3575	0.0965	0.0558	0.0015	0.0017		0.0325					0.0686			0.0686	0.1011	0.2564	0	0.65	0	0	0	0	39.102				6	BL	3	0	2	2
59	Male	3	4.29	8	6.6	0.41	0.19	0.9	1.75	1.1	3.72	4.3	0.2084	0.071	0.0071	0.0036	0.0032	0.1571						0.0103			0.0103	0.1674	0.041	20.5801	0	0	0	0	0	5.871				6	BL	3	1	2	2
60	Male	2	5	8.1	6.6	0.39	0.2	1.1	1.75	1.1	4.15	3.7	0.4239	0.1532	0.0059	0.0027	0.0023											0	0.4239	0	0	0	0	0	0	0				6	BL	3	1	2	2
61	Male	3	8.67	9.6	7.8	0.5	0.19	1.3	2.2	1.45	7.17	5.2	0.9493	0.1089	0.0372	0.0045	0.0046							0.0052			0.0052	0.0052	0.9441	0	0	0	0	0	0	2.964				6	BL	3	1	2	2
62	Female	2	4.72	8.3	6.4	0.48	0.21	0.9	1.75	1.05	4.11	4.3	0.1863	0.0937	0.0359	0.0025	0.0028							0.0301			0.0301	0.0301	0.1562	0	0	0	0	0	0	17.157				6	BL	3	0	2	2
63	Male	3	3.18	7.4	5.99	0.34	0.18	0.85	1.65	1	2.72	3.7	0.1594	0.1062	0.0115	0.002	0.0019	0.0643						0.0143			0.0143	0.0786	0.0808	8.4233	0	0	0	0	0	8.151				6	BL	3	1	2	2
64	Male	2	5.56	8.6	6.6	0.42	0.2	0.95	1.85	1.1	4.76	4.2	0.1481	0.0943	0.0079	0.003	0.0028	0.0067						0.0092			0.0092	0.0159	0.1322	0.8777	0	0	0	0	0	5.244				6	BL	3	1	2	2
65	Female	3	5.41	8.7	7	0.04	0.22	1.05	2.05	1.15	4.69	3.8	0.1797	0.078	0.0738	0.0025	0.0029											0	0.1797	0	0	0	0	0	0	0				6	BL	3	0	2	2
66	Female	1	3.09	7.4	5.7	0.4	0.2	0.85	1.65	0.95	2.71	3.1	0.1125	0.0517	0.0145	0.0018	0.0021	0.0524					0.0072	0.0146	0.0072		0.0074	0.0742	0.0455	6.8644	0	0	0	0	1.1304	8.322				6	BL	3	0	2	2
67	Female	1	3.13	7.4	5.8	0.34	0.17	0.8	1.6	1	2.72	4.1	0.1477	0.0991	0.0223	0.0022	0.0021											0	0.1477	0	0	0	0	0	0	0				6	BL	3	0	2	2
68	Male	2	3.38	7.6	5.9	0.38	0.16	0.8	1.75	1.05	2.82	4.8	0.2672	0.0789	0.005	0.0025	0.0023	0.0279						0.0099			0.0099	0.0378	0.2294	3.6549	0	0	0	0	0	5.643				6	BL	3	1	2	2
69	Female	2	3.69	7.6	6.2	0.4	0.12	0.8	1.75	1.15	3.01	3.5	0.3311	0.047	0.0204	0.0026	0.0025							0.0948			0.0948	0.0948	0.2363	0	0	0	0	0	0	54.036				6	BL	3	0	2	2
70	Male	1	2.66	7.2	5.7	0.32	0.17	0.7	1.45	1.05	2.32	3.3	0.0829	0.0448	0.0096	0.0027	0.0029							0.0536			0.0536	0.0536	0.0293	0	0	0	0	0	0	30.552				6	BL	3	1	2	2
71	Male	2	2.51	7.1	5.8	0.42	0.14	0.7	1.6	0.95	2.08	4.3	0.0909	0.0306	0.0057	0.0015	0.0016							0.0028			0.0028	0.0028	0.0881	0	0	0	0	0	0	1.596				6	BL	3	1	2	2
72	Male	4	7.13	9.4	7.6	0.5	0.29	1.15	2.05	1.3	6.3	4.5	0.142	0.1939	0.0269	0.003	0.0031						0.0156	0.0033			0.0033	0.0189	0.1231	0	0	0	0	0	2.4492	1.881				6	BL	3	1	2	2
73	Male	3	4.66	8.3	6.7	0.45	0.28	0.9	1.85	1.1	3.96	4.2	0.1963	0.0463	0.0132	0.0019	0.0023							0.0034			0.0034	0.0034	0.1929	0	0	0	0	0	0	1.938				6	BL	3	1	2	2
74	Female	4	5.62	8.5	6.3	0.47	0.23	1.05	1.7	1.15	4.54	4.5	0.3924	0.1154	0.1317	0.0016	0.0013	0.0805										0.0805	0.3119	10.5455	0	0	0	0	0	0				6	BL	3	0	2	2
75	Male	2	3.62	7.3	5.6	0.4	0.25	0.7	1.65	1.1	2.97	4.3	0.1902	0.09	0.012	0.0021	0.0024							0.0326			0.0326	0.0326	0.1576	0	0	0	0	0	0	18.582				6	BL	3	1	2	2
76	Male	2	3.2	7.4	5.8	0.35	0.1	0.8	1.5	1.05	2.61	3.2	0.1677	0.0759	0.013	0.0017	0.0014	0.0174						0.0052			0.0052	0.0226	0.1451	2.2794	0	0	0	0	0	2.964				6	BL	3	1	2	2
77	Female	1	1.82	6	4.7	0.38	0.2	0.65	1.35	0.95	1.43	3.5	0.0907	0.0316	0.0205	0.0016	0.0017							0.0153			0.0153	0.0153	0.0754	0	0	0	0	0	0	8.721				6	BL	3	0	2	1
78	Male	4	4.64	6.3	5.8	0.39	0.19	0.95	1.8	1.15	3.91	4.2	0.1731	0.0658	0.0273	0.0023	0.0022						0.0117					0.0117	0.1614	0	0	0	0	0	1.8369	0				6	BL	3	1	2	2
79	Female	1	2.89	7.4	5.8	0.42	0.21	0.7	1.6	0.95	2.39	3.8	0.1432	0.0192	0.0198	0.0015	0.0023							0.0073			0.0073	0.0073	0.1359	0	0	0	0	0	0	4.161				6	BL	3	0	2	2
80	Female	1	3.06	7.3	5.7	0.38	0.18	0.75	1.55	0.9	2.41	4.5	0.2091	0.0405	0.0225	0.0021	0.0021							0.1218			0.1218	0.1218	0.0873	0	0	0	0	0	0	69.426				6	BL	3	0	2	2
81	Female	4	5.08	8.4	6.5	0.35	0.2	1	1.85	1.15	3.93	3.8	0.1814	0.0947	0.2747	0.0028	0.003	0.0542										0.0542	0.1272	7.1002	0	0	0	0	0	0				6	BL	3	0	2	2
82	Female	2	4.05	7.7	6.3	0.38	0.21	0.9	1.8	1.15	3.36	4.3	0.1328	0.0756	0.0317	0.0016	0.0015							0.0108			0.0108	0.0108	0.122	0	0	0	0	0	0	6.156				6	BL	3	0	2	2
83	Female	2	3.07	7.2	5.6	0.42	0.18	0.7	1.45	1.05	2.53	3.5	0.0622	0.0537	0.0229	0.0032	0.0034							0.0022			0.0022	0.0022	0.06	0	0	0	0	0	0	1.254				6	BL	3	0	2	2
84	Male	1	1.58	6	4.6	0.4	0.23	0.55	1.35	0.9	1.25	2.6	0.0479	0.0182	0.0076	0.0018	0.0016							0.0023			0.0023	0.0023	0.0456	0	0	0	0	0	0	1.311				6	BL	3	1	2	1
85	Male	3	7.64	9.5	7.6	0.43	0.17	1.05	1.9	1.3	6.62	5.6	0.2869	0.1536	0.014	0.0014	0.0012		0.0388					0.0718			0.0718	0.1106	0.1763	0	0.776	0	0	0	0	40.926				7	BL	3	1	2	2
86	Male	3	6.47	8.9	7	0.38	0.16	1	1.85	1.25	5.69	4.2	0.1486	0.1263	0.0139	0.0034	0.0033							0.0128			0.0128	0.0128	0.1358	0	0	0	0	0	0	7.296				7	BL	3	1	2	2
87	Male	3	4.97	8.5	6.7	0.42	0.15	0.9	1.75	1.15	4.16	6.2	0.3268	0.0513	0.0169	0.0023	0.0022											0	0.3268	0	0	0	0	0	0	0				7	BL	3	1	2	2
88	Female	3	7.72	9.3	7.5	0.37	0.22	1.1	1.95	1.25	6.25	6.6	0.5745	0.0948	0.2139	0.0028	0.0027				0.0971							0.0971	0.4774	0	0	0	9.0303	0	0	0				7	BL	3	0	2	2
89	Female	5	6.92	8.8	7	0.43	0.2	1.05	1.85	1.2	5.35	5.7	0.2336	0.081	0.8925	0.00255	0.0025							0.0242			0.0242	0.0242	0.2094	0	0	0	0	0	0	13.794				7	BL	3	0	2	2
90	Male	4	6.64	9.2	7.3	0.4	0.12	1	1.85	1.2	5.64	6.3	0.3683	0.0823	0.0156	0.003	0.0032						0.1724	0.1724	0.1724			0.3448	0.1959	0	0	0	0	0	27.0668	98.268				7	BL	3	1	2	2
91	Female	4	6.13	8.8	7.2	0.42	0.11	1	1.85	1.1	5.2	7	0.3974	0.0702	0.1238	0.0027	0.0027							0.131			0.131	0.131	0.2664	0	0	0	0	0	0	74.67				7	BL	3	0	2	2
92	Female	4	5.52	8.5	6.9	0.4	0.17	1.05	1.75	1.05	4.5	5.5	0.3014	0.0633	0.2983	0.003	0.0029							0.0802			0.0802	0.0802	0.2212	0	0	0	0	0	0	45.714				7	BL	3	0	2	2
93	Female	4	5.05	8.2	6.5	0.42	0.18	1.05	1.65	1.05	3.92	6.4	0.3557	0.075	0.3849	0.0029	0.0028	0.0072						0.1183			0.1183	0.1255	0.2302	0.9432	0	0	0	0	0	67.431				7	BL	3	0	2	2
94	Male	4	5.62	8.6	7	0.4	0.19	0.8	1.9	1.15	4.9	5.5	0.3206	0.0506	0.0167	0.0024	0.0025							0.0945			0.0945	0.0945	0.2261	0	0	0	0	0	0	53.865				7	BL	3	1	2	2
95	Male	4	5.54	8.5	6.9	0.35	0.19	1	1.7	1.05	4.83	5.7	0.2822	0.0842	0.0178	0.0025	0.0024							0.0557			0.0557	0.0557	0.2265	0	0	0	0	0	0	31.749				7	BL	3	1	2	2
96	Female	4	7.56	9.2	7.5	0.43	0.19	0.95	2.05	1.1	6.22	6.3	0.3354	0.1047	0.3315	0.0031	0.003							0.0373			0.0373	0.0373	0.2981	0	0	0	0	0	0	21.261				7	BL	3	0	2	2
97	Female	4	6.71	9	7.3	0.38	0.18	1.05	1.85	1.15	5.41	7	0.3844	0.1083	0.3467	0.0036	0.0035							0.1069			0.1069	0.1069	0.2775	0	0	0	0	0	0	60.933				7	BL	3	0	2	2
98	Female	4	6.21	8.9	7.2	0.4	0.16	1.05	1.85	1.25	5	6.8	0.4419	0.0853	0.2739	0.0031	0.0032							0.1092			0.1092	0.1092	0.3327	0	0	0	0	0	0	62.244				7	BL	3	0	2	2
99	Female	4	5.68	8.7	6.9	0.39	0.14	0.95	1.75	1.1	4.65	6	0.3363	0.0595	0.3247	0.0026	0.0027							0.0837			0.0837	0.0837	0.2526	0	0	0	0	0	0	47.709				7	BL	3	0	2	2
100	Female	3	6.48	9.2	7.2	0.4	0.13	0.9	2	1.2	5.34	6.9	0.4995	0.0689	0.1785	0.0034	0.0035							0.2083			0.2083	0.2083	0.2912	0	0	0	0	0	0	118.731				7	BL	3	0	2	2
101	Female	3	7.36	9.2	7.4	0.46	0.27	1	1.95	1.25	6.11	7.3	0.4489	0.081	0.1759	0.0021	0.002							0.1224			0.1224	0.1224	0.3265	0	0	0	0	0	0	69.768				7	BL	3	0	2	2
102	Female	4	6.97	9.4	7.6	0.34	0.15	1	1.95	1.15	5.8	6.3	0.3823	0.1231	0.2088	0.0028	0.0028							0.052			0.052	0.052	0.3303	0	0	0	0	0	0	29.64				7	BL	3	0	2	2
103	Female	4	5.41	8.4	6.6	0.42	0.23	1	1.75	1.1	4.6	4.2	0.28875	0.1104	0.2058	0.0031	0.0035							0.0765			0.0765	0.0765	0.21225	0	0	0	0	0	0	43.605				7	BL	3	0	2	2
104	Male	3	5.04	8.1	6.4	0.38	0.2	0.95	1.85	1.15	4.47	5.2	0.2478	0.0598	0.2178	0.0034	0.0033							0.0585			0.0585	0.0585	0.1893	0	0	0	0	0	0	33.345				7	BL	3	1	2	2
105	Female	5	6.7	8.8	7.1	0.39	0.15	1.2	1.8	1.25	5.14	6.7	0.328	0.0793	0.8936	0.0036	0.0031							0.059			0.059	0.059	0.269	0	0	0	0	0	0	33.63				7	BL	3	0	2	2
106	Female	3	4.09	7.6	6	0.45	0.17	0.85	0.65	0.95	3.43	5.1	0.2278	0.0676	0.1038	0.0026	0.0026							0.03			0.03	0.03	0.1978	0	0	0	0	0	0	17.1				7	BL	3	0	2	2
107	Male	4	5.69	8.3	6.5	0.4	0.13	0.9	1.65	1	4.64	5.8	0.5373	0.0718	0.0216	0.0019	0.0021							0.2265		0.2265		0.2265	0.3108	0	0	0	0	0	0	129.105				7	BL	3	1	2	2
108	Female	4	4.54	8	6.5	0.35	0.15	0.95	1.6	1.15	3.65	4.8	0.3874	0.1102	0.1884	0.0019	0.002							0.1191			0.1191	0.1191	0.2683	0	0	0	0	0	0	67.887				7	BL	3	0	2	2
109	Female	1	3.07	7	5.4	0.38	0.18	0.7	1.5	1.05	2.74	4	0.1188	0.0554	0.0138	0.002	0.0022							0.0277			0.0277	0.0277	0.0911	0	0	0	0	0	0	15.789				7	BL	3	0	2	1
110	Male	2	4.65	8.5	6.5	0.4	0.18	0.95	1.8	0.95	3.89	5.3	0.3728	0.1032	0.0103	0.0015	0.0012											0	0.3728	0	0	0	0	0	0	0				7	BL	3	1	2	2
111	Male	3	4.02	7.7	6.1	0.4	0.25	0.7	1.55	1.05	3.33	5.5	0.3192	0.058	0.0082	0.0027	0.0025							0.0543			0.0543	0.0543	0.2649	0	0	0	0	0	0	30.951				7	BL	3	1	2	2
112	Male	3	4.35	8.2	6.5	0.38	0.12	0.85	1.65	0.95	3.84	4.8	0.2027	0.0411	0.0125	0.0018	0.0018							0.0487			0.0487	0.0487	0.154	0	0	0	0	0	0	27.759				7	BL	3	1	2	2
113	Female	4	4.69	8	6.5	0.38	0.15	0.85	1.65	1.15	3.82	4.9	0.2945	0.0783	0.2269	0.0025	0.0024							0.0663			0.0663	0.0663	0.2282	0	0	0	0	0	0	37.791				7	BL	3	0	2	2
114	Male	3	2.21	6.5	5.1	0.35	0.17	0.7	1.45	0.9	1.88	4	0.1242	0.0475	0.0141	0.0013	0.0012							0.0168			0.0168	0.0168	0.1074	0	0	0	0	0	0	9.576				7	BL	3	1	2	2
115	Female	3	6.5	8.5	6.6	0.36	0.12	1.25	1.85	0.9	4.61	6.6	0.9994	0.1623	0.1228	0.0008	0.0011											0	0.9994	0	0	0	0	0	0	0				8	BL	3	0	2	2
116	Female	4	4.86	8.1	6.2	0.32	0.13	1.25	1.9	1	3.26	4.1	0.7544	0.1154	0.385	0.0036	0.0038											0	0.7544	0	0	0	0	0	0	0				8	BL	3	0	2	2
117	Male	2	2.13	6.3	5	0.28	0.12	0.55	1.35	0.65	1.58	3.25	0.1469	0.0165	0.0067	0.0019	0.0021	0.0386										0.0386	0.1083	5.0566	0	0	0	0	0	0				8	BL	3	1	2	2
118	Female	2	5.92	8.3	6.6	0.36	0.3	1.5	2.05	0.87	4.62	6.15	0.6845	0.1288	0.1001	0.0039	0.0039				0.1443							0.1443	0.5402	0	0	0	13.4199	0	0	0				8	BL	3	0	2	2
119	Female	1	3.25	7.1	5.7	0.26	0.12	1.2	1.75	0.97	2.56	4.55	0.3772	0.0812	0.0326	0.0036	0.0037	0.0348										0.0348	0.3424	4.5588	0	0	0	0	0	0				8	BL	3	0	2	2
120	Male	3	4.98	7.9	6.3	0.39	0.22	1.4	2.05	0.97	3.66	6.05	0.7205	0.1581	0.2066	0.0028	0.0031					0.0681						0.0681	0.6524	0	0	0	0	2.5878	0	0				8	BL	3	1	2	2
121	Male	2	4.74	7.7	6.4	0.21	0.17	2.1	1.75	0.92	3.92	4.67	0.5623	0.0857	0.0133	0.004	0.0037				0.1086							0.1086	0.4537	0	0	0	10.0998	0	0	0				8	BL	3	1	2	2
122	Female	3	6.47	8.4	6.3	0.41	0.17	1.25	2.05	0.97	4.67	6.45	0.715	0.1056	0.0182	0.0028	0.0026											0	0.715	0	0	0	0	0	0	0				8	BL	3	0	2	2
123	Female	3	6.27	8.6	6.7	0.23	0.26	1.4	2.1	0.95	4.48	4.5	0.9767	0.1671	0.2446	0.0029	0.0025				0.1639							0.1639	0.8128	0	0	0	15.2427	0	0	0				8	BL	3	0	2	2
124	Male	4	5.2	8.2	6.5	0.36	0.19	1.15	2.1	1.05	4.39	7	0.3623	0.0689	0.0158	0.0029	0.0027											0	0.3623	0	0	0	0	0	0	0				8	BL	3	1	2	2
125	Male	4	5.33	8.1	6.6	0.34	0.14	1.15	2	0.95	4.09	5.6	0.5732	0.1657	0.0166	0.0022	0.0026											0	0.5732	0	0	0	0	0	0	0				8	BL	3	1	2	2
126	Male	4	5.98	8.5	6.7	0.39	0.23	1.25	2.2	1	4.5	3.4	0.6822	0.1071	0.0201	0.0032	0.0035						0.0103	0.0496			0.0496	0.0599	0.6223	0	0	0	0	0	1.6171	28.272				8	BL	3	1	2	2
127	Male	4	6.1	8.8	6.9	0.37	0.25	1.2	2.2	1.05	4.59	7	0.7593	0.1061	0.0114	0.003	0.003				0.0431							0.0431	0.7162	0	0	0	4.0083	0	0	0				8	BL	3	1	2	2
128	Female	2	2.17	4.69	3.5	0.35	0.11	0.85	0.6	0.8	1.62	4.1	0.2016	0.0559	0.0126	0.0028	0.0031				0.0648		0.0194					0.0842	0.1174	0	0	0	6.0264	0	3.0458	0				8	BL	3	0	2	1
129	Female	3	2.86	6.9	5.5	0.31	0.11	0.85	1.6	0.9	2.18	4.5	0.3068	0.0646	0.0232	0.003	0.0032				0.1736							0.1736	0.1332	0	0	0	16.1448	0	0	0				8	BL	3	0	2	1
130	Female	3	4.42	7.3	6	0.35	0.16	1.05	1.85	1	3.45	7.1	0.4648	0.1474	0.0466	0.0036	0.0034				0.1194							0.1194	0.3454	0	0	0	11.1042	0	0	0				8	BL	3	0	2	2
131	Male	4	4.52	7.6	6.2	0.42	0.16	0.95	2	1.1	3.26	8.1	0.6024	0.0795	0.0648	0.0037	0.0035											0	0.6024	0	0	0	0	0	0	0				8	BL	3	1	2	2
132	Male	4	3.06	7	5.4	0.36	0.16	0.95	1.65	1.05	2.42	4.5	0.2815	0.0674	0.009	0.0032	0.0036			0.0632								0.0632	0.2183	0	0	4.9928	0	0	0	0				8	BL	3	1	2	2
133	Male	4	1.59	6.1	5	0.32	0.14	0.8	1.4	0.75	1.25	3.1	0.2203	0.0482	0.0108	0.0026	0.003				0.0485							0.0485	0.1718	0	0	0	4.5105	0	0	0				8	BL	3	1	2	1
134	Male	4	5.83	8.8	7	0.43	0.14	1.2	2.2	1.15	4.58	5.6	0.7292	0.047	0.0082	0.0014	0.002				0.0155							0.0155	0.7137	0	0	0	1.4415	0	0	0				8	BL	3	1	2	2
135	Male	3	2.73	6.8	5.5	0.34	0.16	1	1.7	1.15	2	3.3	0.4135	0.0502	0.0136	0.0017	0.0021			0.0319			0.0111					0.043	0.3705	0	0	2.5201	0	0	1.7427	0				8	BL	3	1	2	2
136	Male	3	4.99	8.1	6.5	0.33	0.14	1.1	2.1	1.1	3.7	5.8	0.5834	0.1174	0.0118	0.0028	0.0026											0	0.5834	0	0	0	0	0	0	0				8	BL	3	1	2	2
137	Male	4	4.28	7.6	5.9	0.33	0.2	0.1	1.75	0.95	3.36	4.25	0.3493	0.0432	0.063	0.0029	0.0031			0.0077								0.0077	0.3416	0	0	0.6083	0	0	0	0				8	BL	3	1	2	2
138	Male	4	5.3	8.2	6.2	0.21	0.1	1.05	1.95	0.95	3.86	6.05	0.7953	0.0326	0.0113	0.0031	0.0033											0	0.7953	0	0	0	0	0	0	0				8	BL	3	1	2	2
139	Female	3	4.46	7.4	6.5	0.34	0.08	0.75	1.75	0.85	3.37	5.05	0.3993	0.0316	0.0083	0.0011	0.0015											0	0.3993	0	0	0	0	0	0	0				8	BL	3	0	2	2
140	Female	4	3.76	7.4	5.7	0.28	0.13	0.75	1.25	0.95	2.59	3.05	0.4136	0.0614	0.2836	0.0018	0.0021						0.0029					0.0029	0.4107	0	0	0	0	0	0.4553	0				8	BL	3	0	2	2
141	Male	3	2.12	6.4	4.9	0.29	0.08	0.55	1.45	0.65	1.52	3.15	0.2185	0.0117	0.0055	0.0012	0.0014				0.0191							0.0191	0.1994	0	0	0	1.7763	0	0	0				8	BL	3	1	2	2
142	Male	4	2.92	6.8	5.1	0.3	0.08	0.7	1.55	0.85	2.09	2.75	0.1993	0.0223	0.006	0.0016	0.0018			0.0042								0.0042	0.1951	0	0	0.3318	0	0	0	0				8	BL	3	1	2	2
143	Female	4	6.7	8.7	6.7	0.39	0.13	1.35	2	0.95	4.81	6.8	1.0208	0.1837	0.1242	0.0012	0.0015							0.1614			0.1614	0.1614	0.8594	0	0	0	0	0	0	91.998				9	BL	3	0	2	2
144	Female	5	4.66	7.9	6.1	0.29	0.12	1.15	1.75	0.95	3.06	3.9	0.733	0.094	0.3836	0.0032	0.0034							0.6943			0.6943	0.6943	0.0387	0	0	0	0	0	0	395.751				9	BL	3	0	2	2
145	Male	2	2.23	6.4	5.2	0.3	0.14	0.75	1.45	0.75	1.73	3.4	0.1795	0.049	0.0099	0.0021	0.0023							0.1538			0.1538	0.1538	0.0257	0	0	0	0	0	0	87.666				9	BL	3	1	2	2
146	Female	3	5.82	8.1	6.4	0.35	0.28	1.35	1.95	0.85	4.37	5.9	0.6628	0.1074	0.0987	0.0037	0.0037					0.0079		0.065			0.065	0.0729	0.5899	0	0	0	0	0.3002	0	37.05				9	BL	3	0	2	2
147	Male	3	3.15	6.9	5.5	0.25	0.1	1.05	1.65	0.95	2.31	4.3	0.3555	0.0598	0.0312	0.0034	0.0035							0.135			0.135	0.135	0.2205	0	0	0	0	0	0	76.95				9	BL	3	1	2	2
148	Female	4	4.88	7.7	6.1	0.38	0.2	1.25	1.95	0.95	3.41	5.8	0.6988	0.1367	0.2052	0.0026	0.0029							0.3779			0.3779	0.3779	0.3209	0	0	0	0	0	0	215.403				9	BL	3	0	2	2
149	Male	3	4.64	7.5	6.2	0.2	0.015	1.95	1.65	0.9	3.67	4.42	0.5406	0.0643	0.0119	0.0038	0.0035							0.285			0.285	0.285	0.2556	0	0	0	0	0	0	162.45				9	BL	3	1	2	2
150	Female	1	6.37	8.2	6.1	0.4	0.15	1.1	1.95	0.95	4.42	6.2	0.6933	0.0842	0.0168	0.0026	0.0024							0.3391			0.3391	0.3391	0.3542	0	0	0	0	0	0	193.287				9	BL	3	0	2	2
151	Female	4	6.07	8.4	6.6	0.2	0.25	1.3	1.95	0.9	4.28	4.3	0.9553	0.1457	0.2432	0.0025	0.0021							0.3887			0.3887	0.3887	0.5666	0	0	0	0	0	0	221.559				9	BL	3	0	2	2
152	Male	3	5	8	6.4	0.33	0.18	1.05	1.95	1	4.19	6.8	0.3409	0.0475	0.0144	0.0025	0.0023						0.2576	0.2576	0.2576			0.5152	0.0833	0	0	0	0	0	40.4432	146.832				9	BL	3	1	2	2
153	Male	3	5.13	7.9	6.5	0.31	0.13	1.05	1.85	0.9	3.89	5.4	0.5518	0.1443	0.0152	0.0018	0.0022		0.0257					0.268			0.268	0.2937	0.2581	0	0.514	0	0	0	0	152.76				9	BL	3	1	2	2
154	Male	4	5.78	8.3	6.6	0.36	0.22	1.15	2.05	0.95	4.3	3.2	0.6608	0.0857	0.0187	0.0028	0.0031							0.3513			0.3513	0.3513	0.3095	0	0	0	0	0	0	200.241				9	BL	3	1	2	2
155	Male	2	5.9	8.6	6.8	0.34	0.24	1.1	2.05	1	4.39	6.8	0.7379	0.0847	0.01	0.0026	0.0026							0.1706			0.1706	0.1706	0.5673	0	0	0	0	0	0	97.242				9	BL	3	1	2	2
156	Male	3	1.97	4.49	3.4	0.32	0.1	0.75	0.45	0.75	1.42	3.9	0.1802	0.0345	0.0112	0.0024	0.0027							0.1638			0.1638	0.1638	0.0164	0	0	0	0	0	0	93.366				9	BL	3	1	2	1
157	Male	3	2.66	6.7	5.4	0.28	0.1	0.75	1.45	0.85	1.98	4.3	0.2854	0.0432	0.0218	0.0026	0.0028					0.0135		0.1993			0.1993	0.2128	0.0726	0	0	0	0	0.513	0	113.601				9	BL	3	1	2	2
158	Female	2	4.22	7.1	5.9	0.32	0.15	0.95	1.7	0.95	3.25	6.9	0.4434	0.126	0.0452	0.0032	0.003							0.336			0.336	0.336	0.1074	0	0	0	0	0	0	191.52				9	BL	3	0	2	2
159	Male	4	4.32	7.4	6.1	0.39	0.15	0.85	1.85	1.05	3.06	7.9	0.581	0.0581	0.0634	0.0033	0.0031							0.1029			0.1029	0.1029	0.4781	0	0	0	0	0	0	58.653				9	BL	3	1	2	2
160	Male	2	2.86	6.8	5.3	0.33	0.15	0.85	1.5	1	2.22	4.3	0.2601	0.046	0.0076	0.0028	0.0032							0.0753			0.0753	0.0753	0.1848	0	0	0	0	0	0	42.921				9	BL	3	1	2	2
161	Male	1	1.39	5.9	4.9	0.29	0.13	0.7	1.25	0.7	1.05	2.9	0.1989	0.0268	0.0094	0.0022	0.0026							0.1335			0.1335	0.1335	0.0654	0	0	0	0	0	0	76.095				9	BL	3	1	2	1
162	Male	2	5.63	8.6	6.9	0.4	0.13	1.1	2.05	1.1	4.38	5.4	0.7078	0.0256	0.0068	0.001	0.0016							0.1478			0.1478	0.1478	0.56	0	0	0	0	0	0	84.246				9	BL	3	1	2	2
163	Male	3	2.53	6.6	5.4	0.31	0.15	0.9	1.55	1.1	1.8	3.1	0.3921	0.0288	0.0122	0.0013	0.0017							0.1569			0.1569	0.1569	0.2352	0	0	0	0	0	0	89.433				9	BL	3	1	2	2
164	Female	3	4.79	7.9	6.4	0.3	0.13	1	1.95	1.05	3.5	5.6	0.562	0.096	0.1236	0.0024	0.0022							0.218			0.218	0.218	0.344	0	0	0	0	0	0	124.26				9	BL	3	0	2	2
165	Male	4	4.38	7.7	6.1	0.35	0.22	0.1	1.85	1.05	3.51	4.4	0.3819	0.0757	0.0662	0.0031	0.0033							0.117			0.117	0.117	0.2649	0	0	0	0	0	0	66.69				9	BL	3	1	2	2
166	Male	3	5.4	8.3	6.4	0.23	0.12	1.25	2.05	1.05	4.01	6.2	0.8279	0.0192	0.0145	0.0033	0.0035							0.4021			0.4021	0.4021	0.4258	0	0	0	0	0	0	229.197				9	BL	3	1	2	2
167	Male	3	4.56	7.5	6.7	0.36	0.1	0.95	1.85	0.95	3.52	5.2	0.4319	0.0641	0.0115	0.0013	0.0017							0.1239			0.1239	0.1239	0.308	0	0	0	0	0	0	70.623				9	BL	3	1	2	2
168	Female	5	3.86	7.5	5.9	0.3	0.15	0.95	1.35	1.05	2.74	3.2	0.4462	0.0939	0.2868	0.002	0.0023		0.0653					0.1357			0.1357	0.201	0.2452	0	1.306	0	0	0	0	77.349				9	BL	3	0	2	2
169	Male	1	2.22	6.5	5.1	0.31	0.1	0.75	1.55	0.75	1.67	3.3	0.2511	0.0442	0.0087	0.0014	0.0016							0.1403			0.1403	0.1403	0.1108	0	0	0	0	0	0	79.971				9	BL	3	1	2	2
170	Male	2	3.02	6.9	5.3	0.32	0.1	0.9	1.65	0.95	2.24	2.9	0.2319	0.0548	0.0092	0.0018	0.002							0.1691			0.1691	0.1691	0.0628	0	0	0	0	0	0	96.387				9	BL	3	1	2	2
171	Female	5	5.86	8.4	6.6	0.32	0.12	1.05	1.8	1	4.15	1.9	0.7293	0.1834	0.3042	0.0021	0.0024							0.4478			0.4478	0.4478	0.2815	0	0	0	0	0	0	255.246				9	BL	3	0	2	2
172	Male	3	6.73	8.8	6.9	0.33	0.15	1.2	2.05	1.15	5.01	3.4	0.8597	0.1131	0.014	0.0034	0.0029							0.4185			0.4185	0.4185	0.4412	0	0	0	0	0	0	238.545				9	BL	3	1	2	2
173	Female	5	7.52	9.2	7.5	0.39	0.15	1.25	2.1	1.15	5.43	3.2	0.9556	0.1076	0.5812	0.0027	0.0027					0.0891		0.4071			0.4071	0.4962	0.4594	0	0	0	0	3.3858	0	232.047				9	BL	3	0	2	2
174	Male	3	4.8	8.1	6.4	0.38	0.15	1.05	1.75	0.95	3.7	3.9	0.698	0.0794	0.014	0.0031	0.0035							0.2862			0.2862	0.2862	0.4118	0	0	0	0	0	0	163.134				9	BL	3	1	2	2
175	Male	3	1.7	5.8	4.3	0.31	0.09	0.7	1.45	0.85	1.38	4.1	0.2536	0.0183	0.0139	0.0034	0.0034							0.0934			0.0934	0.0934	0.1602	0	0	0	0	0	0	53.238				9	BL	3	1	2	1
176	Male	3	3.66	7.4	5.6	0.25	0.12	0.85	1.65	1.05	2.85	2.9	0.436	0.0786	0.0169	0.0028	0.0024					0.0197		0.103			0.103	0.1227	0.3133	0	0	0	0	0.7486	0	58.71				9	BL	3	1	2	2
177	Female	3	4.96	8.2	6.1	0.38	0.18	1.05	2.05	0.95	3.79	4.2	0.1215	0.0506	0.2139	0.0034	0.0038							0.017			0.017	0.017	0.1045	0	0	0	0	0	0	9.69				9	BL	3	0	2	2
178	Male	4	4.93	7.9	6.4	0.24	0.1	1.05	1.65	1.05	1.14	2.9	0.2095	0.0518	0.0156	0.0012	0.0014							0.0402			0.0402	0.0402	0.1693	0	0	0	0	0	0	22.914				9	BL	3	1	2	2
179	Female	4	3.89	7.3	5.8	0.37	0.2	1.05	1.7	0.95	2.97	2.5	0.2433	0.0793	0.1238	0.002	0.0022					0.0243		0.0245			0.0245	0.0488	0.1945	0	0	0	0	0.9234	0	13.965				9	BL	3	0	2	2
180	Female	4	2.2	6.65	5.1	0.3	0.12	0.7	1.4	0.85	1.77	1.6	0.5148	0.0422	0.2983	0.0031	0.0034							0.1203			0.1203	0.1203	0.3945	0	0	0	0	0	0	68.571				9	BL	3	0	2	1
181	Female	4	4.17	7.9	6.2	0.35	0.12	1.05	1.85	0.9	3.21	3.4	0.5437	0.0736	0.3849	0.0028	0.0025							0.3215			0.3215	0.3215	0.2222	0	0	0	0	0	0	183.255				9	BL	3	0	2	2
182	Male	4	5.12	8.3	6.9	0.35	0.1	1.1	1.85	1	3.83	5.1	0.2949	0.057	0.0167	0.0018	0.0016							0.0906			0.0906	0.0906	0.2043	0	0	0	0	0	0	51.642				9	BL	3	1	2	2
183	Male	4	3.83	7.5	5.8	0.28	0.12	0.95	1.7	0.95	2.89	4.9	0.209	0.0394	0.0178	0.0023	0.0027							0.1023			0.1023	0.1023	0.1067	0	0	0	0	0	0	58.311				9	BL	3	1	2	2
184	Female	4	3.94	7.7	6.1	0.28	0.13	0.95	1.7	0.85	3.21	3.6	0.2188	0.0981	0.3315	0.0022	0.0022							0.1553			0.1553	0.1553	0.0635	0	0	0	0	0	0	88.521				9	BL	3	0	2	2
185	Female	4	6.06	8.5	7.3	0.44	0.18	1	2.05	1.15	4.81	5.8	0.4866	0.1173	0.1921	0.0021	0.0023							0.1295			0.1295	0.1295	0.3571	0	0	0	0	0	0	73.815				10	BL	3	0	2	2
186	Female	5	7.31	9.2	7.5	0.37	0.25	1.12	1.8	1.05	5.73	7.2	0.3398	0.0948	0.6751	0.0026	0.0024						0.018					0.018	0.3218	0	0	0	0	0	2.826	0				10	BL	3	0	2	2
187	Female	4	7.02	9.4	7.7	0.42	0.21	1.05	1.9	1.2	5.9	8.4	0.4515	0.1195	0.2586	0.0028	0.0032							0.0715			0.0715	0.0715	0.38	0	0	0	0	0	0	40.755				10	BL	3	0	2	2
188	Female	4	7.82	8.9	7.4	0.44	0.2	1.1	1.95	1.15	6.43	11	0.6671	0.1495	0.0281	0.0037	0.0036						0.1202	0.1202	0.1202			0.2404	0.5469	0	0	0	0	0	18.8714	68.514				10	BL	3	0	2	2
189	Female	5	5.6	8.4	6.8	0.39	0.19	1.05	1.75	1.25	4.45	5	0.1781	0.1135	0.3443	0.0035	0.0036							0.0602			0.0602	0.0602	0.1179	0	0	0	0	0	0	34.314				10	BL	3	0	2	2
190	Male	4	4.74	8.3	6.5	0.45	0.25	0.95	1.75	1.05	4.16	6.2	0.3745	0.1086	0.687	0.001	0.0015							0.018			0.018	0.018	0.3565	0	0	0	0	0	0	10.26				10	BL	3	1	2	2
191	Female	1	2.59	6.7	5.4	0.35	0.15	0.8	1.5	1	2.4	4.5	0.1115	0.0409	0.0204	0.0014	0.0013							0.0802			0.0802	0.0802	0.0313	0	0	0	0	0	0	45.714				10	BL	3	0	2	1
192	Male	3	7.18	9.2	7.4	0.45	0.24	0.95	1.8	1.15	6.29	7	0.4031	0.1215	0.0291	0.0016	0.0017							0.0719			0.0719	0.0719	0.3312	0	0	0	0	0	0	40.983				10	BL	3	1	2	2
193	Female	3	4.52	7.8	6.4	0.43	0.12	0.95	1.75	1.1	4.01	4	0.335	0.1205	0.0137	0.0019	0.0019						0.2349					0.2349	0.1001	0	0	0	0	0	36.8793	0				10	BL	3	0	2	2
194	Male	3	7.23	9.4	7.5	0.44	0.2	1.05	2.05	1.1	6.4	8	0.5757	0.1186	0.173	0.0015	0.0018							0.0736			0.0736	0.0736	0.5021	0	0	0	0	0	0	41.952				10	BL	3	1	2	2
195	Male	3	6.78	8.9	7.4	0.38	0.22	1.15	1.75	1.05	6.14	5.8	0.3609	0.0794	0.0139	0.0016	0.0015						0.1166					0.1166	0.2443	0	0	0	0	0	18.3062	0				10	BL	3	1	2	2
196	Male	1	1.25	5.4	4.3	0.21	0.1	0.75	1.75	1.05	1.16	3.6	0.5852	0.0204	0.0242	0.0024	0.0026							0.0697			0.0697	0.0697	0.5155	0	0	0	0	0	0	39.729				10	BL	3	1	2	1
197	Female	4	6.35	8.7	7.2	0.35	0.18	1.05	1.75	1.15	5.18	8.4	0.3599	0.1431	0.3687	0.0025	0.0018							0.0738			0.0738	0.0738	0.2861	0	0	0	0	0	0	42.066				10	BL	3	0	2	2
198	Female	4	5.47	8.4	6.7	0.35	0.21	1.05	1.9	1.05	4.48	6.8	0.4675	0.1558	0.3222	0.0024	0.0026				0.0654			0.0504			0.0504	0.1158	0.3517	0	0	0	6.0822	0	0	28.728				10	BL	3	0	2	2
199	Male	2	5.15	8.1	6.6	0.43	0.26	0.95	1.75	1.2	4.63	5	0.4506	0.1432	0.0141	0.0015	0.0015							0.1373			0.1373	0.1373	0.3133	0	0	0	0	0	0	78.261				10	BL	3	1	2	2
200	Male	2	5.76	8.7	6.8	0.43	0.19	1.05	1.9	1.05	4.97	6.5	0.3856	0.0507	0.016	0.0025	0.0023							0.086			0.086	0.086	0.2996	0	0	0	0	0	0	49.02				10	BL	3	1	2	2
201	Female	2	4.25	7.9	6.5	0.33	0.19	0.85	1.5	1.05	3.62	6.8	0.4777	0.0709	0.0611	0.0016	0.0017							0.0598			0.0598	0.0598	0.4179	0	0	0	0	0	0	34.086				11	BL	3	0	2	2
202	Female	4	5.59	8.3	6.7	0.42	0.27	0.95	1.9	1.15	4.48	3.8	0.2244	0.0526	0.1933	0.002	0.0021							0.1724			0.1724	0.1724	0.052	0	0	0	0	0	0	98.268				11	BL	3	0	2	2
203	Male	2	2.93	6.8	5.7	0.35	0.21	0.8	1.55	0.95	2.56	5.8	0.4052	0.0371	0.0031	0.0019	0.0017							0.1378			0.1378	0.1378	0.2674	0	0	0	0	0	0	78.546				11	BL	3	1	2	2
204	Male	2	4.84	7.9	6.4	0.39	0.16	0.95	1.65	1.05	4.09	5.2	0.4155	0.0134	0.0387	0.0016	0.0015							0.1003			0.1003	0.1003	0.3152	0	0	0	0	0	0	57.171				11	BL	3	1	2	2
205	Male	3	6.34	8.5	7.2	0.49	0.22	0.9	1.85	1.05	5.64	7.3	0.4585	0.0115	0.184	0.0024	0.002							0.126			0.126	0.126	0.3325	0	0	0	0	0	0	71.82				11	BL	3	1	2	2
206	Female	4	6.44	8.7	6.8	0.36	0.22	1	1.85	1.05	5.33	5.4	0.4447	0.1047	0.4734	0.0018	0.0016				0.0095			0.0327			0.0327	0.0422	0.4025	0	0	0	0.8835	0	0	18.639				11	BL	3	0	2	2
207	Male	3	4.86	7.7	6.4	0.42	0.2	0.9	1.7	1.15	4.33	6.8	0.1853	0.0299	0.167	0.0029	0.0028							0.0684			0.0684	0.0684	0.1169	0	0	0	0	0	0	38.988				11	BL	3	1	2	2
208	Female	1	1.83	6.1	4.8	0.28	0.12	0.65	1.15	0.75	1.44	3.2	0.1818	0.0369	0.0159	0.0011	0.0011							0.0129			0.0129	0.0129	0.1689	0	0	0	0	0	0	7.353				11	BL	3	0	2	1
209	Male	1	1.92	6.1	4.9	0.3	0.14	0.55	1.4	0.9	1.45	3.6	0.1167	0.0361	0.004	0.0014	0.0016							0.0391		0.0391		0.0391	0.0776	0	0	0	0	0	0	22.287				11	BL	3	1	2	1
210	Male	2	2.96	6.8	5.4	0.3	0.15	0.7	1.5	0.9	2.31	4.8	0.0983	0.0734	0.0052	0.0011	0.001							0.0433			0.0433	0.0433	0.055	0	0	0	0	0	0	24.681				11	BL	3	1	2	2
211	Male	3	1.85	5.9	4.8	0.25	0.17	0.55	1.35	0.9	1.41	4.2	0.0948	0.0358	0.0101	0.0024	0.0026							0.0429			0.0429	0.0429	0.0519	0	0	0	0	0	0	24.453				11	BL	3	1	2	1
212	Female	1	1.83	6.1	4.9	0.23	0.13	0.6	1.25	0.85	1.52	3.8	0.1283	0.033	0.0174	0.0011	0.0012				0.0205							0.0205	0.1078	0	0	0	1.9065	0	0	0				11	BL	3	0	2	1
213	Male	1	1.71	5.8	4.7	0.35	0.13	0.5	1.2	0.7	1.5	3.2	0.1554	0.0363	0.0017	0.001	0.001				0.0371							0.0371	0.1183	0	0	0	3.4503	0	0	0				11	BL	3	1	2	1
214	Male	1	1.56	5.7	4.3	0.29	0.12	0.6	1.2	0.75	1.28	3.6	0.2143	0.0238	0.0096	0.0016	0.0013											0	0.2143	0	0	0	0	0	0	0				11	BL	3	1	2	1
215	Male	4	1.37	5.5	4.4	0.23	0.1	0.55	1.2	0.75	1.09	3.2	0.1771	0.0311	0.0053	0.0011	0.0009							0.0403			0.0403	0.0403	0.1368	0	0	0	0	0	0	22.971				11	BL	3	1	2	1
216	Male	3	1.08	5.3	4.2	0.29	0.12	0.5	1.05	0.65	0.87	2.8	0.1169	0.0276	0.0047	0.0012	0.0014							0.0232			0.0232	0.0232	0.0937	0	0	0	0	0	0	13.224				11	BL	3	1	2	1
217	Male	1	1.13	5.2	4.1	0.25	0.12	0.6	1.1	0.7	0.88	2.6	0.0566	0.0192	0.0053	0.0011	0.0013						0.0148					0.0148	0.0418	0	0	0	0	0	2.3236	0				11	BL	3	1	2	1
218	Male	1	1.26	4.6	5.8	0.23	0.12	0.45	1.05	0.65	0.74	2.5	0.0922	0.0168	0.0024	0.0013	0.0014							0.0103			0.0103	0.0103	0.0819	0	0	0	0	0	0	5.871				11	BL	3	1	2	1
219	Male	1	1.07	4.9	3.8	0.22	0.12	0.45	1.15	1.75	0.86	2.2	0.0635	0.0227	0.0016	0.0013	0.0017							0.0186			0.0186	0.0186	0.0449	0	0	0	0	0	0	10.602				11	BL	3	1	2	1
220	Female	3	8.91	9.6	7.8	0.39	0.12	1.15	2.05	1.15	6.89	4.7	0.2978	0.1261	0.5665	0.0028	0.0024	0.0089										0.0089	0.2889	1.1659	0	0	0	0	0	0				12	BL	3	0	2	2
221	Female	4	8.47	8.7	7.8	0.32	0.21	1.2	2.6	1	6.73	4.4	0.5381	0.2228	0.4147	0.0034	0.0032							0.0315			0.0315	0.0315	0.5066	0	0	0	0	0	0	17.955				12	BL	3	0	2	2
222	Male	3	6.14	9	7	0.33	0.09	0.8	1.85	0.8	5.02	4.25	0.1646	0.0893	0.0089	0.003	0.0029							0.0079			0.0079	0.0079	0.1567	0	0	0	0	0	0	4.503				12	BL	3	1	2	2
223	Female	4	7.48	8.9	7.2	0.41	0.25	1.2	1.84	1.07	5.78	4.75	0.3053	0.1805	0.4466	0.0023	0.0022							0.0066			0.0066	0.0066	0.2987	0	0	0	0	0	0	3.762				12	BL	3	0	2	2
224	Female	4	7.26	9.2	7.1	0.43	0.17	0.85	1.75	0.9	5.96	4.35	0.2357	0.1333	0.0879	0.0019	0.0023						0.0134					0.0134	0.2223	0	0	0	0	0	2.1038	0				12	BL	3	0	2	2
225	Male	3	6.21	8.9	7.2	0.38	0.18	0.65	1.95	0.95	4.9	4.55	0.3018	0.0325	0.015	0.0029	0.0029			0.0207			0.0104					0.0311	0.2707	0	0	1.6353	0	0	1.6328	0				12	BL	3	1	2	2
226	Female	4	8.53	9.4	7.4	0.43	0.26	0.95	2.1	1	6.4	3.95	0.3493	0.1273	0.4992	0.0025	0.0029	0.0084										0.0084	0.3409	1.1004	0	0	0	0	0	0				12	BL	3	0	2	2
227	Female	4	5.87	8.9	7	0.36	0.06	1.3	2.05	1.02	4.7	3.95	0.2181	1.0025	0.4986	0.0028	0.0032							0.0159			0.0159	0.0159	0.2022	0	0	0	0	0	0	9.063				12	BL	3	0	2	2
228	Female	4	8.57	9.6	7.6	0.36	0.05	1.35	2.1	1.07	6.75	4.75	0.3748	0.1675	0.3964	0.0027	0.003							0.0163			0.0163	0.0163	0.3585	0	0	0	0	0	0	9.291				12	BL	3	0	2	2
229	Female	4	6.93	8.8	6.9	0.44	0.2	1.3	2	1.02	5.12	3.45	0.3835	0.1531	0.6043	0.0026	0.0026							0.0046			0.0046	0.0046	0.3789	0	0	0	0	0	0	2.622				12	BL	3	0	2	2
230	Female	4	9.86	10.1	8.2	0.52	0.21	1.4	2.35	1.07	8.16	4.65	0.1659	0.1146	0.429	0.0038	0.0045							0.0045			0.0045	0.0045	0.1614	0	0	0	0	0	0	2.565				12	BL	3	0	2	2
231	Female	4	5.6	9	7.2	0.39	0.27	1.1	2	1.07	4.65	4.05	0.2289	0.1246	0.2589	0.0021	0.0021											0	0.2289	0	0	0	0	0	0	0				12	BL	3	0	2	2
232	Female	4	7.12	8.9	6.9	0.3	0.13	0.9	1.95	1.15	5.33	2.45	0.2557	0.1165	0.2653	0.0026	0.0036	0.0048										0.0048	0.2509	0.6288	0	0	0	0	0	0				12	BL	3	0	2	2
233	Female	4	7.26	9.2	7.3	0.33	0.21	1.2	1.95	1.22	5.64	2.85	0.5379	0.1965	0.146	0.0024	0.0025							0.0114			0.0114	0.0114	0.5265	0	0	0	0	0	0	6.498				12	BL	3	0	2	2
234	Female	4	5.66	8.9	7	0.36	0.23	0.75	1.85	0.95	4.28	2.85	0.1677	0.0586	0.2595	0.002	0.002											0	0.1677	0	0	0	0	0	0	0				12	BL	3	0	2	2
235	Female	4	6.97	8.8	6.9	0.43	0.19	0.95	1.9	1	5.31	2.35	0.1717	0.0325	0.4865	0.0031	0.0015						0.0083					0.0083	0.1634	0	0	0	0	0	1.3031	0				12	BL	3	0	2	2
236	Male	3	6.05	8.1	7	0.47	0.2	0.85	1.95	0.85	4.78	3.05	0.2257	0.0373	0.0044	0.0028	0.0027				0.0344		0.0045					0.0389	0.1868	0	0	0	3.1992	0	0.7065	0				12	BL	3	1	2	2
237	Male	3	6.4	9.1	7.2	0.43	0.23	1.2	2.05	1.02	5.31	2.85	0.2789	0.1103	0.0221	0.0024	0.0032							0.0226			0.0226	0.0226	0.2563	0	0	0	0	0	0	12.882				12	BL	3	1	2	2
238	Female	4	7.65	9.3	7.5	0.41	0.24	1.3	2.05	1.47	5.71	2.45	0.3423	0.16	0.7616	0.0032	0.0029						0.0961					0.0961	0.2462	0	0	0	0	0	15.0877	0				12	BL	3	0	2	2
239	Male	3	6.51	8.3	7.5	0.41	0.27	1.25	2.15	1.12	5.46	2.85	0.2684	0.0908	0.0338	0.0036	0.0035						0.2396					0.2396	0.0288	0	0	0	0	0	37.6172	0				12	BL	3	1	2	2
240	Male	4	6.37	9.3	7.5	0.43	0.27	1.1	2.05	1.07	5.46	2.45	0.2271	0.0571	0.0263	0.0034	0.0033						0.0662	0.0259			0.0259	0.0921	0.135	0	0	0	0	0	10.3934	14.763				12	BL	3	1	2	2
241	Male	3	6.18	8.8	6.9	0.5	0.21	0.8	1.85	1.1	4.97	2.15	0.1695	0.0383	0.0208	0.0022	0.0034	0.0257										0.0257	0.1438	3.3667	0	0	0	0	0	0				12	BL	3	1	2	2
242	Female	4	7.79	9.5	7.5	0.4	0.27	1.55	2.15	1.07	6.09	5.75	0.2998	0.1867	0.5285	0.0035	0.0032	0.0405										0.0405	0.2593	5.3055	0	0	0	0	0	0				12	BL	3	0	2	2
243	Male	4	7.01	9.4	7.3	0.46	0.23	0.75	1.85	1.05	5.51	5.55	0.2943	0.1347	0.0439	0.0033	0.0029							0.0466			0.0466	0.0466	0.2477	0	0	0	0	0	0	26.562				12	BL	3	1	2	2
244	Female	4	9.11	9.8	7.9	0.42	0.13	1.25	2.2	1.2	7.09	4.9	0.3192	0.1475	0.5679	0.0032	0.0028						0.0088	0.0483			0.0483	0.0571	0.2621	0	0	0	0	0	1.3816	27.531				1	BL	3	0	1	2
245	Female	4	8.27	8.5	7.7	0.29	0.2	1.1	2.45	0.95	6.53	4.2	0.5167	0.2014	0.4133	0.003	0.0028						0.0489					0.0489	0.4678	0	0	0	0	0	7.6773	0				1	BL	3	0	1	2
246	Male	3	6.24	9.1	7.2	0.35	0.11	1	1.95	0.9	5.17	4.4	0.1972	0.1218	0.0121	0.0032	0.0031											0	0.1972	0	0	0	0	0	0	0				1	BL	3	1	1	2
247	Female	4	7.38	8.7	7	0.4	0.23	1.05	1.74	1.05	5.53	4.5	0.2836	0.1591	0.4452	0.0021	0.002						0.0065					0.0065	0.2771	0	0	0	0	0	1.0205	0				1	BL	3	0	1	2
248	Female	4	7.36	9.3	7.3	0.45	0.19	1.05	1.85	1	6.11	4.5	0.2683	0.1658	0.0911	0.0021	0.0025							0.0061			0.0061	0.0061	0.2622	0	0	0	0	0	0	3.477				1	BL	3	0	1	2
249	Male	3	6.31	9	7.4	0.4	0.2	0.85	2.05	1.05	5.05	4.7	0.3344	0.11	0.0182	0.0031	0.0031				0.1064							0.1064	0.228	0	0	0	9.8952	0	0	0				1	BL	3	1	1	2
250	Female	4	8.63	9.5	7.6	0.45	0.28	1.15	2.2	1.1	6.55	4.1	0.3819	0.1598	0.5024	0.0027	0.0031						0.0463					0.0463	0.3356	0	0	0	0	0	7.2691	0				1	BL	3	0	1	2
251	Female	5	5.77	8.7	6.8	0.35	0.04	1.15	1.95	1	4.45	3.7	0.1964	0.9811	0.4972	0.0026	0.003											0	0.1964	0	0	0	0	0	0	0				1	BL	3	0	1	2
252	Female	4	8.47	9.4	7.4	0.35	0.03	1.2	2	1.05	6.5	4.5	0.3531	0.1461	0.395	0.0025	0.0028				0.0761			0.0464			0.0464	0.1225	0.2306	0	0	0	7.0773	0	0	26.448				1	BL	3	0	1	2
253	Female	5	6.83	8.6	6.7	0.43	0.18	1.15	1.9	1	4.87	3.2	0.3618	0.1317	0.6029	0.0024	0.0024											0	0.3618	0	0	0	0	0	0	0				1	BL	3	0	1	2
254	Female	5	9.76	9.9	8	0.51	0.19	1.25	2.25	1.05	7.91	4.4	0.1442	0.0932	0.4276	0.0036	0.0043						0.0105	0.0151			0.0151	0.0256	0.1186	0	0	0	0	0	1.6485	8.607				1	BL	3	0	1	2
255	Female	4	5.5	8.8	7	0.38	0.25	0.95	1.9	1.05	4.4	3.8	0.2072	0.1032	0.2575	0.0019	0.0019	0.0256										0.0256	0.1816	3.3536	0	0	0	0	0	0				1	BL	3	0	1	2
256	Female	4	7.22	9	7.1	0.32	0.15	1.1	2.05	1.25	5.48	2.6	0.2883	0.149	0.2685	0.0028	0.0038											0	0.2883	0	0	0	0	0	0	0				1	BL	3	0	1	2
257	Female	4	7.16	9	7.1	0.32	0.19	1.05	1.85	1.2	5.39	2.6	0.5162	0.1751	0.1446	0.0022	0.0023	0.2553										0.2553	0.2609	33.4443	0	0	0	0	0	0				1	BL	3	0	1	2
258	Female	4	5.76	9	7.2	0.38	0.25	0.95	1.95	1.05	4.43	3	0.2003	0.0911	0.2627	0.0022	0.0022	0.0083										0.0083	0.192	1.0873	0	0	0	0	0	0				1	BL	3	0	1	2
259	Female	4	7.07	8.9	7.1	0.45	0.21	1.15	2	1.1	5.46	2.5	0.2043	0.1249	0.4897	0.0033	0.0017											0	0.2043	0	0	0	0	0	0	0				1	BL	3	0	1	2
260	Male	3	6.15	8.2	7.2	0.49	0.22	1.05	2.05	0.95	4.93	3.2	0.2583	0.0698	0.0076	0.003	0.0029			0.0214								0.0214	0.2369	0	0	1.6906	0	0	0	0				1	BL	3	1	1	2
261	Male	4	6.3	8.9	7	0.42	0.21	1.05	1.95	1	5.06	2.6	0.2572	0.0889	0.0207	0.0022	0.003											0	0.2572	0	0	0	0	0	0	0				1	BL	3	1	1	2
262	Female	5	7.55	9.1	7.3	0.4	0.22	1.15	1.95	1.45	5.46	2.2	0.3206	0.1386	0.7602	0.003	0.0027						0.0246					0.0246	0.296	0	0	0	0	0	3.8622	0				1	BL	3	0	1	2
263	Male	4	6.41	8.1	7.3	0.4	0.25	1.1	2.05	1.1	5.21	2.6	0.2467	0.0694	0.0324	0.0034	0.0033				0.014							0.014	0.2327	0	0	0	1.302	0	0	0				1	BL	3	1	1	2
264	Male	4	6.27	9.1	7.3	0.42	0.25	0.95	1.95	1.05	5.21	2.2	0.2054	0.0357	0.0249	0.0032	0.0031	0.0129										0.0129	0.1925	1.6899	0	0	0	0	0	0				2	BL	3	1	1	2
265	Male	3	6.28	8.9	7.1	0.52	0.23	1	1.95	1.2	5.12	2.3	0.2021	0.0708	0.024	0.0024	0.0036							0.0085			0.0085	0.0085	0.1936	0	0	0	0	0	0	4.845				2	BL	3	1	1	2
266	Female	5	7.69	9.3	7.3	0.39	0.25	1.4	2.05	1.05	5.84	5.5	0.2781	0.1653	0.5271	0.0033	0.003											0	0.2781	0	0	0	0	0	0	0				2	BL	3	0	1	2
267	Male	4	7.11	9.5	7.5	0.48	0.25	0.95	1.95	1.15	5.66	5.7	0.3269	0.1672	0.0471	0.0035	0.0031	0.0225										0.0225	0.3044	2.9475	0	0	0	0	0	0				2	BL	3	1	1	2
268	Male	4	6.99	8.9	7	0.5	0.3	1.1	1.95	1.05	5.46	3.2	0.1584	0.047	0.0214	0.0032	0.0037	0.003						0.0057			0.0057	0.0087	0.1497	0.393	0	0	0	0	0	3.249				2	BL	3	1	1	2
269	Female	4	7.07	9.1	7	0.5	0.3	1.1	1.95	1.05	5.51	4.2	0.1821	0.1504	0.547	0.003	0.0029											0	0.1821	0	0	0	0	0	0	0				2	BL	3	0	1	2
270	Male	4	6.08	9.2	7.5	0.49	0.21	1.05	1.95	1.05	5.15	3.7	0.2853	0.1154	0.0345	0.0033	0.0041			0.0532								0.0532	0.2321	0	0	4.2028	0	0	0	0				2	BL	3	1	1	2
271	Male	3	5.15	8.2	6.7	0.38	0.2	0.95	2.05	1.05	4	4.7	0.1984	0.1049	0.021	0.0023	0.002			0.0142								0.0142	0.1842	0	0	1.1218	0	0	0	0				2	BL	3	1	1	2
272	Female	3	6.43	9.5	7.5	0.45	0.23	1.15	2	1	5.51	5.5	0.3006	0.1361	0.1523	0.003	0.0034						0.0278					0.0278	0.2728	0	0	0	0	0	4.3646	0				2	BL	3	0	1	2
273	Female	4	3.88	7.6	6	0.39	0.21	1	1.55	0.95	2.76	3.6	0.1751	0.0901	0.2667	0.0013	0.0017				0.0676							0.0676	0.1075	0	0	0	6.2868	0	0	0				2	BL	3	0	1	2
274	Male	2	2.28	6.4	5.1	0.4	0.12	0.65	1.4	0.85	1.55	5.6	0.1084	0.0218	0.0234	0.0014	0.0014				0.0325							0.0325	0.0759	0	0	0	3.0225	0	0	0				2	BL	3	1	1	2
275	Female	1	2.78	7.1	6.6	0.31	0.2	0.75	1.45	0.8	2.05	4.6	0.0945	0.0314	0.0093	0.0014	0.0014							0.0079			0.0079	0.0079	0.0866	0	0	0	0	0	0	4.503				2	BL	3	0	1	2
276	Male	1	2.4	6.9	5.4	0.3	0.11	0.7	1.4	0.85	1.68	3.2	0.0794	0.0423	0.0214	0.0018	0.0017							0.0045			0.0045	0.0045	0.0749	0	0	0	0	0	0	2.565				2	BL	3	1	1	2
277	Male	1	2.12	6.5	5.3	0.35	0.15	0.75	1.55	0.85	1.52	4.2	0.0742	0.0201	0.0238	0.0011	0.0012							0.0067		0.0067		0.0067	0.0675	0	0	0	0	0	0	3.819				2	BL	3	1	1	2
278	Female	1	2.25	6.7	5.3	0.35	0.17	0.65	1.45	0.9	1.63	5.1	0.0697	0.0342	0.0044	0.0016	0.0014											0	0.0697	0	0	0	0	0	0	0				2	BL	3	0	1	1
279	Female	1	2.88	7	5.5	0.35	0.2	0.75	1.35	0.85	2.32	5.1	0.0817	0.0315	0.0026	0.0015	0.0013							0.0085			0.0085	0.0085	0.0732	0	0	0	0	0	0	4.845				2	BL	3	0	1	1
280	Female	1	1.21	5.5	4.3	0.22	0.29	0.5	1.05	0.7	0.83	4.1	0.0433	0.0091	0.0187	0.0006	0.0005							0.0091			0.0091	0.0091	0.0342	0	0	0	0	0	0	5.187				2	BL	3	0	1	1
281	Male	1	2.57	7	5.4	0.35	0.2	0.65	1.55	0.85	1.92	4.1	0.1165	0.0156	0.0021	0.0015	0.0016							0.0219			0.0219	0.0219	0.0946	0	0	0	0	0	0	12.483				2	BL	3	1	1	2
282	Male	1	1.31	5.6	4.3	0.3	0.1	0.5	1.2	0.75	0.92	4.1	0.046	0.0142	0.0034	0.0006	0.0008											0	0.046	0	0	0	0	0	0	0				2	BL	3	1	1	1
283	Male	1	1.11	5.3	4.1	0.55	0.13	0.45	1.2	0.7	0.68	4.4	0.0291	0.0115	0.0027	0.0008	0.0006											0	0.0291	0	0	0	0	0	0	0				2	BL	3	1	1	1
284	Female	2	2.46	6.4	5.3	0.31	0.13	0.65	1.25	0.75	2.04	3.2	0.0785	0.0463	0.0212	0.0023	0.0024							0.0305			0.0305	0.0305	0.048	0	0	0	0	0	0	17.385				4	TV	1	0	1	1
285	Male	1	2.38	6.4	5.2	0.29	0.18	0.85	1.3	0.85	1.85	1.6	0.0797	0.1209	0.0017	0.0021	0.0021			0.0229								0.0229	0.0568	0	0	1.8091	0	0	0	0				4	TV	1	1	1	1
286	Male	4	1.56	5.7	4.6	0.27	0.13	0.5	1.35	0.85	1.21	2.7	0.1085	0.1021	0.007	0.0024	0.0026			0.0311								0.0311	0.0774	0	0	2.4569	0	0	0	0				4	TV	1	1	1	1
287	Female	4	4.62	7.9	6.2	0.45	0.25	0.85	1.75	0.9	3.36	4.2	0.1646	0.0594	0.0583	0.0018	0.0021				0.0892							0.0892	0.0754	0	0	0	8.2956	0	0	0				4	TV	1	0	1	2
288	Female	1	1.57	5.8	4.4	0.3	0.12	0.6	1.25	0.8	0.93	2.9	0.1457	0.0209	0.0086	0.0013	0.0011							0.0127			0.0127	0.0127	0.133	0	0	0	0	0	0	7.239				4	TV	1	0	1	1
289	Male	4	3.86	7.9	6.2	0.38	0.2	0.85	1.7	0.9	2.75	3.7	0.0878	0.0487	0.0312	0.0023	0.0019	0.0208										0.0208	0.067	2.7248	0	0	0	0	0	0				4	TV	1	1	1	2
290	Male	3	1.5	5.6	4.3	0.3	0.1	0.65	1.1	0.85	0.87	2.4	0.0811	0.0182	0.0112	0.0013	0.001							0.0172			0.0172	0.0172	0.0639	0	0	0	0	0	0	9.804				4	TV	1	1	1	1
291	Female	1	1.85	6	4.6	0.35	0.14	0.65	1.15	0.85	1.16	2.4	0.1332	0.0231	0.0106	0.0013	0.0009						0.0293					0.0293	0.1039	0	0	0	0	0	4.6001	0				4	TV	1	0	1	1
292	Male	2	3.1	6.9	5.4	0.38	0.17	0.8	1.38	0.9	2.12	3	0.1558	0.0482	0.0145	0.001	0.0016	0.0568										0.0568	0.099	7.4408	0	0	0	0	0	0				4	TV	1	1	1	1
293	Male	2	1.78	5.9	4.5	0.38	0.16	0.65	1.35	0.9	1.13	2.5	0.0624	0.0205	0.0073	0.0009	0.0009							0.0203			0.0203	0.0203	0.0421	0	0	0	0	0	0	11.571				4	TV	1	1	1	1
294	Male	4	1.51	5.7	4.3	0.26	0.1	0.6	1.2	0.75	0.84	3.4	0.0515	0.0395	0.0073	0.0008	0.0008	0.009										0.009	0.0425	1.179	0	0	0	0	0	0				4	TV	1	1	1	1
295	Male	1	1.3	5.6	4.4	0.33	0.13	0.55	1.15	0.75	0.79	2.2	0.0827	0.0141	0.0047	0.0007	0.0012						0.0028					0.0028	0.0799	0	0	0	0	0	0.4396	0				4	TV	1	1	1	1
296	Female	1	1.65	6	4.6	0.31	0.11	0.6	1.15	0.75	1.02	2	0.0671	0.0149	0.0118	0.0013	0.001							0.0063			0.0063	0.0063	0.0608	0	0	0	0	0	0	3.591				4	TV	1	0	1	1
297	Male	1	1.07	5	3.8	0.31	0.1	0.55	1.05	0.6	0.54	2.1	0.0616	0.0109	0.0054	0.001	0.0009	0.0089										0.0089	0.0527	1.1659	0	0	0	0	0	0				4	TV	1	1	1	1
298	Male	3	1.52	5.6	4.4	0.3	0.13	0.6	1.16	0.75	0.84	2.3	0.0771	0.0123	0.0124	0.001	0.0008							0.0315			0.0315	0.0315	0.0456	0	0	0	0	0	0	17.955				4	TV	1	1	1	1
299	Male	2	1.35	5.6	4.4	0.3	0.12	0.55	1.15	0.7	0.74	2.9	0.0379	0.0114	0.0073	0.0015	0.0008							0.0079			0.0079	0.0079	0.03	0	0	0	0	0	0	4.503				4	TV	1	1	1	1
300	Male	1	1.01	5	3.8	0.22	0.1	0.55	1.05	0.65	0.49	2.1	0.0465	0.0162	0.0051	0.0004	0.0008							0.0066			0.0066	0.0066	0.0399	0	0	0	0	0	0	3.762				4	TV	1	1	1	1
301	Male	2	1.44	5.6	4.3	0.25	0.11	0.6	1.15	0.75	0.79	2.5	0.1271	0.0307	0.0108	0.0011	0.0011						0.0134					0.0134	0.1137	0	0	0	0	0	2.1038	0				4	TV	1	1	1	1
302	Female	1	1.57	5.8	4.5	0.25	0.09	0.65	1.2	0.8	0.89	3.4	0.0493	0.0258	0.0146	0.0014	0.0012			0.0207			0.0104					0.0311	0.0182	0	0	1.6353	0	0	1.6328	0				4	TV	1	0	1	1
303	Female	1	0.78	4.4	3.4	0.27	0.28	0.5	1	0.65	0.35	1.8	0.0721	0.0107	0.0089	0.0006	0.0006	0.0084										0.0084	0.0637	1.1004	0	0	0	0	0	0				4	TV	1	0	1	1
304	Female	1	1.28	5.2	4.1	0.24	0.12	0.6	1.2	0.65	0.73	2.8	0.1283	0.0189	0.0099	0.0011	0.001											0	0.1283	0	0	0	0	0	0	0				4	TV	1	0	1	1
305	Male	1	0.95	4.8	3.6	0.21	0.1	0.45	1.05	0.75	0.48	2.2	0.0387	0.0255	0.0017	0.0007	0.0008							0.0163			0.0163	0.0163	0.0224	0	0	0	0	0	0	9.291				4	TV	1	1	1	1
306	Male	1	1.03	5	3.8	0.25	0.09	0.25	1.15	0.7	0.6	2	0.0252	0.0151	0.0079	0.0004	0.0005							0.0046			0.0046	0.0046	0.0206	0	0	0	0	0	0	2.622				4	TV	1	1	1	1
307	Male	1	0.66	4.5	3.5	0.21	0.11	0.5	1	0.65	0.33	1.4	0.0338	0.0114	0.0049	0.0004	0.0007							0.0045			0.0045	0.0045	0.0293	0	0	0	0	0	0	2.565				4	TV	1	1	1	1
308	Male	2	0.77	4.6	3.6	0.25	0.13	0.45	0.95	0.6	0.4	1.5	0.0293	0.0122	0.0087	0.0006	0.0006											0	0.0293	0	0	0	0	0	0	0				4	TV	1	1	1	1
309	Male	3	0.84	4.6	3.5	0.25	0.1	0.5	1.05	0.7	0.38	1.9	0.0306	0.0152	0.008	0.0005	0.0003	0.0048										0.0048	0.0258	0.6288	0	0	0	0	0	0				4	TV	1	1	1	1
310	Male	1	0.58	4.1	3.2	0.26	0.1	0.4	0.95	0.7	0.24	1.8	0.0983	0.0071	0.0019	0.0004	0.0005											0	0.0983	0	0	0	0	0	0	0				4	TV	1	1	1	1
311	Male	1	0.4	3.6	2.7	0.22	0.1	0.45	0.8	0.35	0.15	1.6	0.126	0.0054	0.0048	0.0007	0.0007											0	0.126	0	0	0	0	0	0	0				4	TV	1	1	1	1
312	Male	4	3.85	7.5	5.8	0.38	0.12	0.8	1.65	1.25	3.19	3.8	0.1169	0.0679	0.0231	0.0009	0.0009						0.0083					0.0083	0.1086	0	0	0	0	0	1.3031	0				5	TV	1	1	1	2
313	Male	3	3.7	7.4	5.8	0.33	0.18	0.9	1.6	1.05	3.01	3.5	0.1531	0.0711	0.0162	0.0025	0.0022				0.0344		0.0045					0.0389	0.1142	0	0	0	3.1992	0	0.7065	0				5	TV	1	1	1	2
314	Male	1	4.34	7.7	6.3	0.38	0.15	0.95	1.55	1	3.63	0.4	0.0903	0.1282	0.0067	0.0017	0.0014							0.0226			0.0226	0.0226	0.0677	0	0	0	0	0	0	12.882				5	TV	1	1	1	2
315	Female	1	3.54	7	5.7	0.37	0.2	0.9	1.5	1.05	2.87	3.9	0.2072	0.1077	0.0188	0.0015	0.0012						0.0961					0.0961	0.1111	0	0	0	0	0	15.0877	0				5	TV	1	0	1	1
316	Female	1	7.17	8.7	7.2	0.4	0.16	1.25	1.85	1.15	5.77	4.5	0.4621	0.2671	0.0287	0.0022	0.0022						0.2396					0.2396	0.2225	0	0	0	0	0	37.6172	0				5	TV	1	0	1	2
317	Female	1	3.57	7.2	6.1	0.35	0.15	0.9	1.45	0.85	2.88	3.6	0.2172	0.0753	0.0097	0.0014	0.0016						0.0662	0.0259			0.0259	0.0921	0.1251	0	0	0	0	0	10.3934	14.763				5	TV	1	0	1	1
318	Female	1	5.19	8	6.5	0.32	0.13	1	1.85	1.1	4.38	3.3	0.1909	0.1009	0.0214	0.0019	0.0022	0.0257										0.0257	0.1652	3.3667	0	0	0	0	0	0				5	TV	1	0	1	2
319	Female	1	3.96	7.5	6	0.47	0.19	0.9	1.55	0.95	3.35	4.1	0.123	0.0786	0.014	0.0015	0.0016	0.0405										0.0405	0.0825	5.3055	0	0	0	0	0	0				5	TV	1	0	1	2
320	Female	1	2.93	6.9	5.6	0.35	0.15	0.85	1.4	0.95	3.32	3.1	0.1521	0.0432	0.0065	0.0015	0.0018							0.0466			0.0466	0.0466	0.1055	0	0	0	0	0	0	26.562				5	TV	1	0	1	1
321	Male	1	3.51	6.7	5.6	0.35	0.17	0.9	1.55	0.9	2.89	3.5	0.1701	0.081	0.0155	0.0021	0.0019						0.0088	0.0483			0.0483	0.0571	0.113	0	0	0	0	0	1.3816	27.531				5	TV	1	1	1	1
322	Male	2	4.76	7.9	6.4	0.35	0.13	0.95	1.7	1.1	3.96	3.4	0.2012	0.128	0.007	0.002	0.0018						0.0489					0.0489	0.1523	0	0	0	0	0	7.6773	0				5	TV	1	1	1	2
323	Male	1	3.55	7	5.7	0.34	0.18	0.9	1.5	0.95	2.88	3.1	0.1822	0.0833	0.0173	0.0016	0.0014				0.0492							0.0492	0.133	0	0	0	4.5756	0	0	0				5	TV	1	1	1	2
324	Female	1	2.09	6.4	5.3	0.28	0.12	0.75	1.25	0.9	1.71	3.1	0.0913	0.0243	0.0044	0.0011	0.0013							0.0191			0.0191	0.0191	0.0722	0	0	0	0	0	0	10.887				5	TV	1	0	1	1
325	Male	1	3.57	7.3	5.7	0.32	0.14	0.75	1.55	0.95	2.9	3.1	0.1218	0.1181	0.0273	0.002	0.0017							0.0193			0.0193	0.0193	0.1025	0	0	0	0	0	0	11.001				5	TV	1	1	1	2
326	Male	2	2.96	6.9	5.2	0.35	0.21	0.8	1.45	0.9	2.46	4	0.1051	0.0471	0.0123	0.0017	0.0015							0.0315			0.0315	0.0315	0.0736	0	0	0	0	0	0	17.955				5	TV	1	1	1	1
327	Male	1	2.82	6.6	5.2	0.3	0.14	0.75	1.4	0.85	2.31	3.1	0.0923	0.0611	0.0036	0.0013	0.0017							0.0144			0.0144	0.0144	0.0779	0	0	0	0	0	0	8.208				5	TV	1	1	1	1
328	Male	1	1.87	5.8	4.6	0.32	0.13	0.65	1.3	0.85	1.48	3.2	0.0823	0.0323	0.0161	0.0005	0.0005						0.025					0.025	0.0573	0	0	0	0	0	3.925	0				5	TV	1	1	1	1
329	Female	4	5.24	8.1	6.5	0.33	0.15	0.95	1.75	1.15	4.26	4.4	0.2338	0.0922	0.1072	0.0023	0.0021	0.0035	0.01					0.0932			0.0932	0.1067	0.1271	0.4585	0.2	0	0	0	0	53.124				6	TV	1	0	2	2
330	Female	4	5.04	8.4	6.8	0.4	0.15	0.95	1.75	1.25	4.2	4.5	0.2008	0.1101	0.2059	0.0021	0.0025	0.0025					0.0118					0.0143	0.1865	0.3275	0	0	0	0	1.8526	0				6	TV	1	0	2	2
331	Female	1	4.39	7.8	6.4	0.38	0.1	0.9	1.55	1.1	3.6	3.2	0.2655	0.1137	0.0277	0.0019	0.0021				0.0856							0.0856	0.1799	0	0	0	7.9608	0	0	0				6	TV	1	0	2	2
332	Male	1	4.6	7.7	6.3	0.41	0.19	0.85	1.45	1.15	3.87	3.8	0.1653	0.1332	0.0024	0.0025	0.0023						0.0124	0.0095			0.0095	0.0219	0.1434	0	0	0	0	0	1.9468	5.415				6	TV	1	1	2	2
333	Male	2	3.76	7.6	6.2	0.31	0.12	0.75	1.5	1.25	3.11	4	0.1289	0.0607	0.0039	0.0022	0.0021						0.0183					0.0183	0.1106	0	0	0	0	0	2.8731	0				6	TV	1	1	2	2
334	Female	2	3.91	7.5	6.1	0.33	0.18	0.8	1.4	1.2	3.23	5.1	0.1901	0.0836	0.0228	0.0015	0.0011						0.0144	0.0065			0.0065	0.0209	0.1692	0	0	0	0	0	2.2608	3.705				6	TV	1	0	2	2
335	Female	2	4.03	7.5	6	0.34	0.13	0.9	1.5	1.15	3.24	4.5	0.2505	0.102	0.0269	0.0015	0.002						0.1229					0.1229	0.1276	0	0	0	0	0	19.2953	0				6	TV	1	0	2	2
336	Female	2	4.38	8	6.4	0.32	0.17	0.85	1.55	1.15	3.65	5	0.1739	0.1202	0.0364	0.0022	0.0022	0.0175		0.0348								0.0523	0.1216	2.2925	0	2.7492	0	0	0	0				6	TV	1	0	2	2
337	Female	2	3.73	7.7	6.1	0.38	0.19	0.75	1.45	1.1	3.02	4.8	0.2656	0.0589	0.0216	0.002	0.002			0.0035				0.0082			0.0082	0.0117	0.2539	0	0	0.2765	0	0	0	4.674				6	TV	1	0	2	2
338	Female	2	3.92	7.8	6.1	0.4	0.15	0.8	1.55	1.2	3.23	5.2	0.1639	0.0859	0.0187	0.002	0.0015						0.008	0.00349			0.00349	0.01149	0.15241	0	0	0	0	0	1.256	1.9893				6	TV	1	0	2	2
339	Female	3	4.45	8	6.5	0.4	0.21	0.75	1.55	1.1	3.72	5.7	0.1822	0.1069	0.0385	0.0021	0.0021						0.003	0.0361			0.0361	0.0391	0.1431	0	0	0	0	0	0.471	20.577				6	TV	1	0	2	2
340	Male	2	3.39	7.3	6	0.39	0.1	0.75	1.45	1.15	2.78	3.4	0.1679	0.0603	0.0073	0.0016	0.0017			0.0167								0.0167	0.1512	0	0	1.3193	0	0	0	0				6	TV	1	1	2	2
341	Male	3	3.18	7.4	5.9	0.35	0.13	0.75	1.45	0.95	2.61	4.4	0.1986	0.0523	0.0026	0.0016	0.0018							0.0189			0.0189	0.0189	0.1797	0	0	0	0	0	0	10.773				6	TV	1	1	2	2
342	Female	1	2.61	6.9	5.5	0.3	0.07	0.7	1.45	1.05	2.21	4.3	0.1069	0.0425	0.0163	0.0018	0.0016	0.0177										0.0177	0.0892	2.3187	0	0	0	0	0	0				6	TV	1	0	2	1
343	Female	1	3.25	7.3	5.9	0.4	0.15	0.75	1.4	1.2	2.61	3.1	0.1443	0.0443	0.0242	0.0019	0.0022	0.013		0.0043								0.0173	0.127	1.703	0	0.3397	0	0	0	0				6	TV	1	0	2	1
344	Male	1	2.41	6.6	5.4	0.3	0.15	0.65	1.4	1.05	2.03	2.8	0.129	0.0373	0.0011	0.0019	0.0023							0.0111			0.0111	0.0111	0.1179	0	0	0	0	0	0	6.327				6	TV	1	1	2	1
345	Female	1	2.47	6.9	5.5	0.35	0.08	0.75	1.4	1.15	2.02	4.3	0.1941	0.0293	0.0167	0.0014	0.0015			0.0031				0.0178			0.0178	0.0209	0.1732	0	0	0.2449	0	0	0	10.146				6	TV	1	0	2	1
346	Female	1	2.2	6.6	5.2	0.4	0.2	0.6	1.25	0.95	1.79	3.8	0.0955	0.0671	0.0126	0.0013	0.0011	0.007		0.0175				0.0086			0.0086	0.0331	0.0624	0.917	0	1.3825	0	0	0	4.902				6	TV	1	0	2	1
347	Female	1	3.39	7.3	5.8	0.4	0.17	0.75	1.55	1.1	2.84	4.4	0.1579	0.0587	0.0024	0.0017	0.0017						0.0012	0.0015			0.0015	0.0027	0.1552	0	0	0	0	0	0.1884	0.855				6	TV	1	0	2	1
348	Female	1	1.64	6.1	4.7	0.3	0.1	0.65	1.15	0.85	1.4	3.5	0.0751	0.0206	0.0077	0.0013	0.0013	0.0267					0.0078					0.0345	0.0406	3.4977	0	0	0	0	1.2246	0				6	TV	1	0	2	1
349	Female	1	2.05	6.5	5.1	0.3	0.15	0.55	1.4	1	1.73	3.6	0.1121	0.0358	0.0189	0.0015	0.0013						0.0121	0.0161			0.0161	0.0282	0.0839	0	0	0	0	0	1.8997	9.177				6	TV	1	0	2	1
350	Male	1	1.22	5.6	4.3	0.3	0.07	0.45	1.15	0.9	0.98	2.4	0.0551	0.0179	0.0019	0.0006	0.001						0.0084					0.0084	0.0467	0	0	0	0	0	1.3188	0				6	TV	1	1	2	1
351	Male	1	1.33	5.5	4.5	0.28	0.09	0.5	1.05	0.9	1.08	2.6	0.0779	0.0237	0.004	0.0009	0.001											0	0.0779	0	0	0	0	0	0	0				6	TV	1	1	2	1
352	Female	1	0.98	5	4.1	0.25	0.09	0.4	1	0.85	0.77	2.8	0.703	0.0144	0.0035	0.0007	0.0008				0.0018			0.0014			0.0014	0.0032	0.6998	0	0	0	0.1674	0	0	0.798				6	TV	1	0	2	1
353	Male	4	4.7	8.1	6.2	0.35	0.15	0.9	1.6	1	3.95	5.5	0.1583	0.0523	0.0596	0.0015	0.0016											0	0.1583	0	0	0	0	0	0	0				7	TV	1	1	2	2
354	Female	3	8.53	9.5	7.8	0.35	0.15	1.15	1.95	1.15	7.14	5.8	0.516	0.0955	0.1784	0.0013	0.0016	0.0714										0.0714	0.4446	9.3534	0	0	0	0	0	0				7	TV	1	0	2	2
355	Male	2	4.79	7.8	6.4	0.4	0.2	0.9	1.6	1.05	3.99	6	0.1744	0.0743	0.0098	0.0016	0.0013	0.0148										0.0148	0.1596	1.9388	0	0	0	0	0	0				7	TV	1	1	2	2
356	Female	3	7.94	9.2	7.6	0.35	0.15	1.15	2	1.05	6.63	7	0.3768	0.0904	0.2984	0.0025	0.0028											0	0.3768	0	0	0	0	0	0	0				7	TV	1	0	2	2
357	Female	4	7.11	9	7.5	0.45	0.2	1.05	1.95	1.15	5.78	6.5	0.4205	0.0798	0.3114	0.0026	0.0023			0.0201								0.0201	0.4004	0	0	1.5879	0	0	0	0				7	TV	1	0	2	2
358	Female	3	6.18	8.6	7.2	0.4	0.25	0.95	1.85	1.05	5.24	5.5	0.2082	0.1279	0.2582	0.0026	0.00221		0.0315									0.0315	0.1767	0	0.63	0	0	0	0	0				7	TV	1	0	2	2
359	Male	4	5.79	8.3	6.8	0.35	0.25	1.05	1.75	1.05	4.66	3.2	0.4511	0.087	0.0583	0.0014	0.0016											0	0.4511	0	0	0	0	0	0	0				7	TV	1	1	2	2
360	Male	4	4.66	7.6	6.3	0.32	0.16	0.8	1.8	1.15	3.92	5.5	0.2163	0.0959	0.0222	0.0023	0.0021						0.0159					0.0159	0.2004	0	0	0	0	0	2.4963	0				7	TV	1	1	2	2
361	Female	5	4.11	7.8	6.4	0.35	0.17	0.85	1.5	1.05	3.53	4	0.1705	0.0759	0.0529	0.0025	0.0023			0.0535				0.0249			0.0249	0.0784	0.0921	0	0	4.2265	0	0	0	14.193				7	TV	1	0	2	2
362	Male	2	5.2	7.8	6.3	0.34	0.13	0.85	1.75	1.05	4.38	3.5	0.1292	0.1439	0.0086	0.0016	0.0012		0.0336									0.0336	0.0956	0	0.672	0	0	0	0	0				7	TV	1	1	2	2
363	Female	3	6.03	8.7	7.1	0.35	0.23	1	1.8	1.05	5.12	3	0.1757	0.081	0.1483	0.0019	0.0016											0	0.1757	0	0	0	0	0	0	0				7	TV	1	0	2	2
364	Male	3	6.74	8.9	7.4	0.37	0.18	0.95	1.8	1.15	5.66	4.8	0.3579	0.0745	0.0288	0.0027	0.0025											0	0.3579	0	0	0	0	0	0	0				7	TV	1	1	2	2
365	Male	4	5.05	8.2	6.7	0.39	0.13	1	1.85	1.1	4.33	6	0.2211	0.0599	0.0556	0.0019	0.0015											0	0.2211	0	0	0	0	0	0	0				7	TV	1	1	2	2
366	Male	3	5.08	8.4	6.7	0.35	0.2	0.9	1.8	0.95	4.42	4	0.2135	0.0868	0.0102	0.002	0.0024							0.0042			0.0042	0.0042	0.2093	0	0	0	0	0	0	2.394				7	TV	1	1	2	2
367	Male	1	1.92	6.3	4.8	0.33	0.2	0.65	1.25	0.9	1.57	6.8	0.1187	0.0216	0.0042	0.0012	0.0014				0.0186		0.0194					0.038	0.0807	0	0	0	1.7298	0	3.0458	0				7	TV	1	1	2	1
368	Male	1	3.54	7.5	6.2	0.3	0.12	0.75	1.45	0.9	3	5.8	0.1574	0.0448	0.0053	0.0016	0.0014							0.0248			0.0248	0.0248	0.1326	0	0	0	0	0	0	14.136				7	TV	1	1	2	2
369	Male	3	5.36	8.4	6.7	0.38	0.21	0.95	1.9	1.1	4.73	6	0.2638	0.0832	0.0254	0.0022	0.0021			0.0497								0.0497	0.2141	0	0	3.9263	0	0	0	0				7	TV	1	1	2	2
370	Male	1	1.77	5.8	4.5	0.38	0.22	0.65	1.15	0.9	1.35	3.5	0.1423	0.0254	0.0059	0.0021	0.0025			0.0325								0.0325	0.1098	0	0	2.5675	0	0	0	0				7	TV	1	1	2	1
371	Male	1	1.12	4.9	3.8	0.3	0.2	0.65	1.05	0.8	0.84	2.5	0.0752	0.0124	0.0054	0.0005	0.0005											0	0.0752	0	0	0	0	0	0	0				7	TV	1	1	2	1
372	Male	2	0.74	4.5	3.6	0.28	0.11	0.55	0.9	0.7	0.56	1.7	0.0385	0.0078	0.008	0.0014	0.0017											0	0.0385	0	0	0	0	0	0	0				7	TV	1	1	2	1
373	Female	4	1.49	5.7	4.5	0.25	0.18	0.75	1.2	0.85	1.18	3.2	0.0884	0.0216	0.2369	0.0018	0.0013											0	0.0884	0	0	0	0	0	0	0				7	TV	1	0	2	1
374	Female	3	6.87	9.2	7.6	0.45	0.12	1.25	2.2	1.05	5.86	6	0.3827	0.1121	0.1694	0.0032	0.0029			0.0981								0.0981	0.2846	0	0	7.7499	0	0	0	0				8	TV	1	0	2	2
375	Female	5	6.56	8.6	7.2	0.47	0.18	1.1	2.05	1.1	5.67	6.5	0.2823	0.1424	0.3453	0.0038	0.0042							0.0295			0.0295	0.0295	0.2528	0	0	0	0	0	0	16.815				8	TV	1	0	2	2
376	Female	5	8.91	9.7	7.8	0.49	0.15	1.1	2.05	1.05	7.52	7.5	0.3711	0.142	0.4207	0.0034	0.0032				0.0432							0.0432	0.3279	0	0	0	4.0176	0	0	0				8	TV	1	0	2	2
377	Female	3	7.52	9.4	7.7	0.44	0.15	1.15	1.9	0.95	6.63	5.5	0.1654	0.1129	0.3276	0.0027	0.0027											0	0.1654	0	0	0	0	0	0	0				8	TV	1	0	2	2
378	Male	3	7.42	9.3	7.6	0.46	0.26	1.05	2.05	1.1	6.79	4.3	0.1633	0.1334	0.0185	0.0032	0.0036							0.0128			0.0128	0.0128	0.1505	0	0	0	0	0	0	7.296				8	TV	1	1	2	2
379	Female	5	7.22	8.9	7	0.43	0.25	1.25	2.2	1.2	6.17	5	0.1545	0.178	0.4432	0.0027	0.0023							0.0135			0.0135	0.0135	0.141	0	0	0	0	0	0	7.695				8	TV	1	0	2	2
380	Female	4	6.74	8.7	6.8	0.4	0.19	1.1	2.15	1	5.87	5.2	0.2605	0.1032	0.3727	0.0022	0.0022				0.109							0.109	0.1515	0	0	0	10.137	0	0	0				8	TV	1	0	2	2
381	Female	4	8.89	9.8	8.2	0.35	0.17	1.25	2.35	1.15	7.95	6.8	0.345	0.1842	0.3688	0.0062	0.0063				0.0187							0.0187	0.3263	0	0	0	1.7391	0	0	0				8	TV	1	0	2	2
382	Female	5	6.86	8.7	7.2	0.4	0.22	1.05	1.9	1.55	6.1	8	0.2482	0.0815	0.3723	0.0027	0.0025			0.0167								0.0167	0.2315	0	0	1.3193	0	0	0	0				8	TV	1	0	2	2
383	Female	4	3.61	7.4	6.7	0.38	0.16	0.95	1.6	0.9	3.17	6.2	0.1191	0.0746	0.2051	0.002	0.0028											0	0.1191	0	0	0	0	0	0	0				8	TV	1	0	2	2
384	Female	5	7.89	8.8	7.4	0.47	0.15	1.2	2.1	1.05	6.92	5.1	0.1929	0.1993	0.3169	0.0023	0.0021											0	0.1929	0	0	0	0	0	0	0				8	TV	1	0	2	2
385	Female	4	4.03	7.5	6.2	0.39	0.1	0.95	1.8	0.95	3.49	4.6	0.1637	0.0712	0.2119	0.0028	0.0024											0	0.1637	0	0	0	0	0	0	0				8	TV	1	0	2	2
386	Female	3	6.81	8.9	7.2	0.42	0.21	1.05	2.15	1.1	6.06	6.4	0.1956	0.1015	0.1025	0.0026	0.0023											0	0.1956	0	0	0	0	0	0	0				8	TV	1	0	2	2
387	Female	2	4.89	8.3	6.9	0.4	0.2	0.9	1.95	1.05	4.25	5.3	0.2113	0.0745	0.0981	0.0015	0.0014		0.0177									0.0177	0.1936	0	0.354	0	0	0	0	0				8	TV	1	0	2	2
388	Male	3	2.21	6.3	5.2	0.27	0.13	0.75	1.5	0.85	1.99	3.2	0.0797	0.0338	0.0104	0.0022	0.0024		0.013				0.0043					0.0173	0.0624	0	0.26	0	0	0	0.6751	0				8	TV	1	1	2	1
389	Male	2	3.46	6.8	5.6	0.31	0.13	0.85	1.55	0.85	3.05	4	0.1358	0.0839	0.0085	0.0018	0.0016							0.0111			0.0111	0.0111	0.1247	0	0	0	0	0	0	6.327				8	TV	1	1	2	1
390	Male	3	2.54	6.5	5.3	0.3	0.2	0.8	1.65	0.85	2.23	3.8	0.0969	0.0446	0.0174	0.0035	0.0033						0.0031	0.0178			0.0178	0.0209	0.076	0	0	0	0	0	0.4867	10.146				8	TV	1	1	2	1
391	Male	1	1.81	5.8	4.6	0.29	0.13	0.65	1.35	0.75	1.58	2.5	0.053	0.0198	0.0062	0.0022	0.0025	0.007					0.0175	0.0086			0.0086	0.0331	0.0199	0.917	0	0	0	0	2.7475	4.902				8	TV	1	1	2	1
392	Male	2	2.33	6.4	5.3	0.28	0.19	0.75	1.35	0.85	2.03	4.1	0.1269	0.0452	0.0107	0.0018	0.0012			0.0012				0.0015			0.0015	0.0027	0.1242	0	0	0.0948	0	0	0	0.855				8	TV	1	1	2	1
393	Female	4	2.27	6.5	5.2	0.3	0.14	0.8	1.35	0.85	1.98	3.4	0.1742	0.0503	0.2358	0.0022	0.0028	0.0267		0.0078								0.0345	0.1397	3.4977	0	0.6162	0	0	0	0				8	TV	1	0	2	1
394	Male	1	1.34	5.5	4.3	0.33	0.12	0.6	1.15	0.85	1.2	2.5	0.1404	0.0155	0.004	0.0012	0.0016			0.0121				0.0161			0.0161	0.0282	0.1122	0	0	0.9559	0	0	0	9.177				8	TV	1	1	2	1
395	Female	4	8.33	9.3	7.7	0.32	0.14	1.05	1.8	1.1	6.94	5.6	0.4946	0.0741	0.177	0.0009	0.0012											0	0.4946	0	0	0	0	0	0	0				9	TV	1	0	2	2
396	Male	3	4.99	8	6.5	0.43	0.21	1	1.75	1.1	4.19	6.2	0.1958	0.0957	0.0112	0.002	0.0017											0	0.1958	0	0	0	0	0	0	0				9	TV	1	1	2	2
397	Female	3	7.84	9.1	7.4	0.33	0.13	0.95	1.9	0.95	6.48	6.85	0.3442	0.0579	0.2952	0.0023	0.0026	0.0175										0.0175	0.3267	2.2925	0	0	0	0	0	0				9	TV	1	0	2	2
398	Female	4	7.21	9.2	7.7	0.46	0.22	1.2	2.05	1.17	6.03	6.75	0.4422	0.1012	0.3128	0.0028	0.0025							0.0082			0.0082	0.0082	0.434	0	0	0	0	0	0	4.674				9	TV	1	0	2	2
399	Female	3	6.08	8.5	7	0.38	0.23	0.75	1.75	0.95	5.09	5.35	0.1756	0.0954	0.255	0.0024	0.00201			0.0348			0.008	0.00349			0.00349	0.04629	0.12931	0	0	2.7492	0	0	1.256	1.9893				9	TV	1	0	2	2
400	Male	3	5.69	8.2	6.6	0.33	0.23	0.85	1.65	0.95	4.51	3.05	0.4185	0.0325	0.0551	0.0012	0.0014							0.0361			0.0361	0.0361	0.3824	0	0	0	0	0	0	20.577				9	TV	1	1	2	2
401	Male	4	4.56	7.5	6.1	0.3	0.14	0.6	1.7	1.05	3.77	5.35	0.1837	0.0634	0.019	0.0021	0.0019											0	0.1837	0	0	0	0	0	0	0				9	TV	1	1	2	2
402	Female	5	4.21	8	6.6	0.36	0.19	1	1.6	1.07	3.78	4.25	0.1922	0.0973	0.0543	0.0027	0.0025							0.0189			0.0189	0.0189	0.1733	0	0	0	0	0	0	10.773				9	TV	1	0	2	2
403	Male	2	5.3	8	6.5	0.35	0.15	1	1.85	1.07	4.63	3.75	0.1509	0.1653	0.01	0.0018	0.0014	0.0177										0.0177	0.1332	2.3187	0	0	0	0	0	0				9	TV	1	1	2	2
404	Female	3	6.13	8.9	7.3	0.36	0.25	1.15	1.9	1.07	5.37	3.25	0.1974	0.1024	0.1497	0.0021	0.0018	0.013					0.003					0.016	0.1814	1.703	0	0	0	0	0.471	0				9	TV	1	0	2	2
405	Male	4	6.84	9.1	7.6	0.38	0.2	1.1	1.9	1.17	5.91	5.05	0.3796	0.0959	0.0302	0.0029	0.0027							0.0111			0.0111	0.0111	0.3685	0	0	0	0	0	0	6.327				9	TV	1	1	2	2
406	Male	4	5.15	8.4	6.9	0.4	0.15	1.15	1.95	1.12	4.58	6.25	0.2428	0.0813	0.057	0.0021	0.0017							0.0178			0.0178	0.0178	0.225	0	0	0	0	0	0	10.146				9	TV	1	1	2	2
407	Male	3	4.98	8.3	6.5	0.33	0.18	0.7	1.7	0.85	4.27	3.85	0.1809	0.0543	0.007	0.0018	0.0022	0.007						0.0086			0.0086	0.0156	0.1653	0.917	0	0	0	0	0	4.902				9	TV	1	1	2	2
408	Male	1	2.02	6.5	5	0.34	0.22	0.8	1.35	0.92	1.82	7.05	0.1404	0.043	0.0056	0.0014	0.0016						0.0012	0.0015			0.0015	0.0027	0.1377	0	0	0	0	0	0.1884	0.855				9	TV	1	1	2	1
409	Male	2	3.44	7.4	6	0.28	0.1	0.55	1.35	0.8	2.85	5.65	0.1248	0.0123	0.0021	0.0014	0.0012	0.0267					0.0078					0.0345	0.0903	3.4977	0	0	0	0	1.2246	0				9	TV	1	1	2	2
410	Male	3	5.26	8.3	6.5	0.36	0.19	0.75	1.8	1	4.58	5.85	0.2312	0.0325	0.0222	0.002	0.0025						0.0083	0.0161			0.0161	0.0244	0.2068	0	0	0	0	0	1.3031	9.177				9	TV	1	1	2	2
411	Male	1	1.67	5.7	4.3	0.36	0.2	0.45	1.05	0.8	1.2	3.35	0.1097	0.0136	0.0027	0.0019	0.0023											0	0.1097	0	0	0	0	0	0	0				9	TV	1	1	2	1
412	Male	2	1.22	5.1	4	0.31	0.22	0.8	1.15	0.82	1.09	2.75	0.0969	0.0338	0.0068	0.0007	0.0007											0	0.0969	0	0	0	0	0	0	0				9	TV	1	1	2	1
413	Male	2	0.84	4.7	3.8	0.29	0.13	0.7	1	0.72	0.81	1.95	0.0602	0.0292	0.0094	0.0016	0.0019				0.0018			0.0014			0.0014	0.0032	0.057	0	0	0	0.1674	0	0	0.798				9	TV	1	1	2	1
414	Female	3	1.59	5.9	4.7	0.26	0.2	0.9	1.3	0.87	1.43	3.45	0.1101	0.043	0.2383	0.002	0.0015											0	0.1101	0	0	0	0	0	0	0				10	TV	1	0	2	1
415	Female	3	6.97	9.4	7.8	0.46	0.14	1.4	2.3	1.07	6.11	6.25	0.4044	0.1335	0.1708	0.0034	0.0031				0.0344		0.0045					0.0389	0.3655	0	0	0	3.1992	0	0.7065	0				10	TV	1	0	2	2
416	Female	5	6.46	8.5	7	0.45	0.16	0.9	1.95	1	5.52	6.35	0.2497	0.1099	0.3421	0.0036	0.004							0.0226			0.0226	0.0226	0.2271	0	0	0	0	0	0	12.882				10	TV	1	0	2	2
417	Female	4	9.01	9.9	8	0.5	0.17	1.25	2.15	1.07	7.77	7.75	0.3928	0.1634	0.4221	0.0036	0.0034						0.0961					0.0961	0.2967	0	0	0	0	0	15.0877	0				10	TV	1	0	2	2
418	Female	3	7.42	9.3	7.5	0.42	0.13	0.95	1.8	0.85	6.48	5.35	0.1328	0.0804	0.3244	0.0025	0.0025						0.039					0.039	0.0938	0	0	0	0	0	6.123	0				10	TV	1	0	2	2
419	Male	3	7.22	9.1	7.5	0.43	0.25	0.95	1.9	1.05	6.59	4.1	0.1419	0.112	0.0199	0.0034	0.0038			0.0035			0.0662	0.0259			0.0259	0.0956	0.0463	0	0	0.2765	0	0	10.3934	14.763				10	TV	1	1	2	2
420	Female	5	7.42	9.1	7.1	0.46	0.26	1.35	2.35	1.25	6.37	5.2	0.1759	0.1994	0.4446	0.0029	0.0025	0.0257										0.0257	0.1502	3.3667	0	0	0	0	0	0				10	TV	1	0	2	2
421	Female	4	6.64	8.6	6.6	0.38	0.17	0.9	2.05	0.9	5.72	5.05	0.2279	0.0707	0.3695	0.002	0.002											0	0.2279	0	0	0	0	0	0	0				10	TV	1	0	2	2
422	Female	4	8.99	10	8.4	0.36	0.19	1.4	2.45	1.17	8.2	7.05	0.3667	0.2056	0.3702	0.0064	0.0065			0.0167				0.0466			0.0466	0.0633	0.3034	0	0	1.3193	0	0	0	26.562				10	TV	1	0	2	2
423	Female	5	6.76	8.6	7	0.38	0.2	0.85	1.8	1.45	5.95	7.85	0.2156	0.049	0.3691	0.0025	0.0033						0.0088	0.0483			0.0483	0.0571	0.1585	0	0	0	0	0	1.3816	27.531				10	TV	1	0	2	2
424	Female	4	3.51	7.3	6.5	0.36	0.14	0.75	1.5	0.8	3.02	6.05	0.0865	0.0325	0.2019	0.0018	0.0026						0.0489					0.0489	0.0376	0	0	0	0	0	7.6773	0				10	TV	1	0	2	1
425	Female	5	7.79	8.7	7.2	0.45	0.13	1	2	0.95	6.77	4.95	0.1603	0.1668	0.3137	0.0021	0.0019			0.0043								0.0043	0.156	0	0	0.3397	0	0	0	0				10	TV	1	0	2	2
426	Female	4	4.13	7.7	6.4	0.4	0.12	1.1	1.9	0.97	3.74	4.85	0.1854	0.0926	0.2133	0.003	0.0026											0	0.1854	0	0	0	0	0	0	0				10	TV	1	0	2	2
427	Female	3	6.91	9.1	7.4	0.43	0.23	1.2	2.25	1.12	6.31	6.65	0.2173	0.1229	0.1039	0.0028	0.0025			0.0031								0.0031	0.2142	0	0	0.2449	0	0	0	0				10	TV	1	0	2	2
428	Female	2	4.99	8.5	7.1	0.41	0.22	1.05	2.05	1.07	4.5	5.55	0.233	0.0959	0.0995	0.0017	0.0016			0.0175								0.0175	0.2155	0	0	1.3825	0	0	0	0				10	TV	1	0	2	2
429	Male	3	2.31	6.5	5.4	0.28	0.15	0.9	1.6	0.87	2.24	3.45	0.1014	0.0552	0.0118	0.0024	0.0026											0	0.1014	0	0	0	0	0	0	0				10	TV	1	1	2	1
430	Male	2	3.56	7	5.8	0.32	0.15	1	1.65	0.87	3.3	4.25	0.1575	0.1053	0.0053	0.0016	0.0014											0	0.1575	0	0	0	0	0	0	0				10	TV	1	1	2	2
431	Male	3	2.44	6.4	5.1	0.28	0.18	0.6	1.55	0.75	2.08	3.65	0.0643	0.0121	0.0188	0.0037	0.0035						0.0121					0.0121	0.0522	0	0	0	0	0	1.8997	0				11	TV	1	1	2	1
432	Male	2	1.91	6	4.8	0.3	0.15	0.8	1.45	0.77	1.83	2.75	0.0747	0.0412	0.003	0.002	0.0023						0.0084					0.0084	0.0663	0	0	0	0	0	1.3188	0				11	TV	1	1	2	1
433	Male	3	2.23	6.3	5.1	0.26	0.17	0.55	1.25	0.75	1.88	3.95	0.0943	0.0127	0.0121	0.002	0.0014											0	0.0943	0	0	0	0	0	0	0				11	TV	1	1	2	1
434	Female	3	2.17	6.4	5	0.28	0.12	0.6	1.25	0.75	1.83	3.25	0.1416	0.0325	0.2326	0.002	0.0026											0	0.1416	0	0	0	0	0	0	0				11	TV	1	0	2	1
435	Male	2	1.24	5.4	4.1	0.31	0.1	0.4	1.05	0.75	1.05	2.35	0.0378	1.0325	0.0054	0.0014	0.0018											0	0.0378	0	0	0	0	0	0	0				11	TV	1	1	2	1
436	Female	1	2.01	6.3	4.83	0.37	0.2	0.8	1.35	1.2	1.67	3.5	0.1293	0.0252	0.0068	0.002	0.0019							0.0207			0.0207	0.0207	0.1086	0	0	0	0	0	0	11.799				11	TV	1	0	2	1
437	Female	1	3.85	7.6	6.03	0.4	0.15	0.9	1.65	1.4	3.19	3.3	0.1809	0.0428	0.0171	0.0015	0.0023							0.0333			0.0333	0.0333	0.1476	0	0	0	0	0	0	18.981				11	TV	1	0	2	2
438	Female	2	3.3	7.4	5.62	0.37	0.3	0.8	1.25	1.4	2.86	3.45	0.1467	0.0236	0.0156	0.0012	0.0017	0.0405						0.0165			0.0165	0.057	0.0897	5.3055	0	0	0	0	0	9.405				11	TV	1	0	2	2
439	Female	4	6.35	9.1	6.92	0.4	0.3	1.05	1.05	1.55	5.07	3.75	0.1495	0.0531	0.2534	0.0025	0.0027							0.0112			0.0112	0.0112	0.1383	0	0	0	0	0	0	6.384				11	TV	1	0	2	2
440	Female	2	4.51	8.2	6.22	0.41	0.28	0.95	1.8	1.55	3.78	3.75	0.1903	0.037	0.021	0.0023	0.0023							0.0108			0.0108	0.0108	0.1795	0	0	0	0	0	0	6.156				11	TV	1	0	2	2
441	Female	1	3.78	7.5	5.72	0.34	0.31	0.75	1.65	1.4	3	3.55	0.1622	0.0463	0.0177	0.0021	0.0022							0.0255			0.0255	0.0255	0.1367	0	0	0	0	0	0	14.535				11	TV	1	0	2	2
442	Female	1	2.9	7.2	5.52	0.36	0.29	0.75	1.55	1.35	2.39	3.35	0.1274	0.0291	0.015	0.002	0.0018							0.0115			0.0115	0.0115	0.1159	0	0	0	0	0	0	6.555				11	TV	1	0	2	1
443	Female	2	2.94	7.1	5.53	0.36	0.21	0.95	1.5	1.3	2.44	3.7	0.2404	0.0335	0.0178	0.0018	0.0017	0.0025						0.0402			0.0402	0.0427	0.1977	0.3275	0	0	0	0	0	22.914				11	TV	1	0	2	1
444	Male	1	2.42	6.4	5.13	0.29	0.19	0.75	1.45	1.25	1.99	2.7	0.1366	0.0247	0.0021	0.0017	0.0018							0.0246			0.0246	0.0246	0.112	0	0	0	0	0	0	14.022				11	TV	1	1	2	1
445	Female	1	3.07	7.3	5.53	0.36	0.22	0.8	1.45	1.4	2.62	2.5	0.1132	0.0422	0.0105	0.0014	0.0021											0	0.1132	0	0	0	0	0	0	0				11	TV	1	0	2	1
446	Male	2	3.48	7.3	5.73	0.39	0.23	0.95	1.5	1.4	2.86	3.1	0.2168	0.0327	0.0026	0.0022	0.002					0.001		0.0627			0.0627	0.0637	0.1531	0	0	0	0	0.038	0	35.739				11	TV	1	1	2	2
447	Female	1	2.29	6.4	4.93	0.35	0.19	0.95	0.4	1.3	1.91	3	0.1324	0.0269	0.0068	0.0015	0.0019							0.0224			0.0224	0.0224	0.11	0	0	0	0	0	0	12.768				11	TV	1	0	2	1
448	Male	2	2.75	6.6	5.03	0.33	0.19	0.85	1.45	1.4	2.35	2.5	0.1481	0.0419	0.0042	0.0018	0.0017							0.0169			0.0169	0.0169	0.1312	0	0	0	0	0	0	9.633				12	TV	1	1	2	1
449	Female	1	1.89	5.9	4.73	0.32	0.17	0.2	1.3	1.15	1.53	3.7	0.1079	0.0188	0.0073	0.0012	0.0016							0.0254			0.0254	0.0254	0.0825	0	0	0	0	0	0	14.478				12	TV	1	0	2	1
450	Female	2	2.82	7	5.43	0.33	0.22	0.85	1.55	1.3	2.41	2.7	0.1417	0.0274	0.0084	0.0014	0.0016					0.0018		0.006			0.006	0.0078	0.1339	0	0	0	0	0.0684	0	3.42				12	TV	1	0	2	1
451	Male	2	2.38	6.5	5.03	0.31	0.21	0.8	1.4	1.3	1.88	3	0.1475	0.0464	0.0033	0.0023	0.0018					0.0009		0.0235			0.0235	0.0244	0.1231	0	0	0	0	0.0342	0	13.395				12	TV	1	1	2	1
452	Male	1	2.11	6.3	4.83	0.31	0.21	0.8	1.6	1.25	1.75	2.6	0.1133	0.0362	0.0039	0.0014	0.0018							0.0131			0.0131	0.0131	0.1002	0	0	0	0	0	0	7.467				12	TV	1	1	2	1
453	Female	1	1.92	6.1	4.63	0.31	0.2	0.8	1.35	1.15	1.59	3.1	0.1213	0.0272	0.009	0.0016	0.0014							0.0221			0.0221	0.0221	0.0992	0	0	0	0	0	0	12.597				12	TV	1	0	2	1
454	Male	2	2.16	6.3	5.03	0.29	0.22	0.8	1.4	1.3	1.76	2.3	0.1144	0.0304	0.0032	0.0016	0.0017							0.0162			0.0162	0.0162	0.0982	0	0	0	0	0	0	9.234				12	TV	1	1	2	1
455	Female	1	2.31	6.4	4.93	0.36	0.23	0.9	1.3	1.3	1.82	2.8	0.1271	0.0277	0.0156	0.0013	0.0014					0.002		0.0125			0.0125	0.0145	0.1126	0	0	0	0	0.076	0	7.125				12	TV	1	0	2	1
456	Female	1	2.38	6.6	5.13	0.33	0.23	0.8	1.5	1.3	2.02	2.8	0.1258	0.0331	0.0093	0.0015	0.0017							0.0122			0.0122	0.0122	0.1136	0	0	0	0	0	0	6.954				12	TV	1	0	2	1
457	Female	1	1.92	6	4.73	0.34	0.22	0.65	1.3	1.25	1.59	3	0.106	0.0189	0.0083	0.0016	0.0015	0.0019						0.0086			0.0086	0.0105	0.0955	0.2489	0	0	0	0	0	4.902				12	TV	1	0	2	1
458	Female	1	2.02	6.4	5.03	0.3	0.18	0.8	1.35	1.25	1.67	2.7	0.1461	0.031	0.0068	0.0016	0.0014	0.0238										0.0238	0.1223	3.1178	0	0	0	0	0	0				12	TV	1	0	2	1
459	Female	1	2.47	6.5	5.03	0.34	0.21	0.9	1.45	1.25	1.97	3.2	0.1652	0.0429	0.0103	0.0018	0.0016							0.0361			0.0361	0.0361	0.1291	0	0	0	0	0	0	20.577				12	TV	1	0	2	1
460	Female	1	1.9	6.2	4.73	0.31	0.22	0.7	1.25	1.15	1.57	2.8	0.1041	0.0223	0.0067	0.0017	0.0014							0.0113			0.0113	0.0113	0.0928	0	0	0	0	0	0	6.441				12	TV	1	0	2	1
461	Male	2	1.75	5.9	4.43	0.32	0.17	0.75	1.3	1.2	1.44	2.8	0.1064	0.0275	0.0017	0.0018	0.0014							0.0146			0.0146	0.0146	0.0918	0	0	0	0	0	0	8.322				12	TV	1	1	2	1
462	Female	1	1.42	5.6	4.43	0.31	0.21	0.7	1.2	1.15	1.16	2.3	0.0762	0.0181	0.0047	0.0015	0.0012							0.0167			0.0167	0.0167	0.0595	0	0	0	0	0	0	9.519				12	TV	1	0	2	1
463	Female	1	2.6	6.8	5.33	0.37	0.19	0.8	1.35	1.35	2.13	2.4	0.1282	0.0302	0.0082	0.0017	0.0013							0.0151			0.0151	0.0151	0.1131	0	0	0	0	0	0	8.607				12	TV	1	0	2	1
464	Male	1	1.46	5.6	4.23	0.31	0.18	0.7	1.1	1.1	1.24	2	0.085	0.0187	0.0021	0.0011	0.0014							0.0119			0.0119	0.0119	0.0731	0	0	0	0	0	0	6.783				12	TV	1	1	2	1
465	Male	2	1.65	5.6	4.33	0.29	0.2	0.7	1.1	1.15	1.39	1.8	0.0954	0.0305	0.0058	0.0012	0.0013							0.0091			0.0091	0.0091	0.0863	0	0	0	0	0	0	5.187				12	TV	1	1	2	1
466	Female	1	1.72	5.8	4.53	0.31	0.18	0.75	1.2	1.15	1.51	2	0.0888	0.0252	0.0092	0.0013	0.0014							0.0202			0.0202	0.0202	0.0686	0	0	0	0	0	0	11.514				12	TV	1	0	2	1
467	Male	1	1.38	5.8	4.52	0.31	0.29	0.6	1.3	1.05	1.16	1.95	0.1888	0.0236	0.0108	0.0012	0.0014							0.0104			0.0104	0.0104	0.1784	0	0	0	0	0	0	5.928				1	TV	1	1	1	1
468	Male	1	1.53	5.9	4.42	0.3	0.29	0.75	1.25	1.1	1.27	2.05	0.0748	0.0167	0.0044	0.001	0.0014							0.025			0.025	0.025	0.0498	0	0	0	0	0	0	14.25				1	TV	1	1	1	1
469	Male	1	1.38	5.8	4.42	0.3	0.31	0.7	1.35	1.15	1.17	2.25	0.1126	0.0205	0.007	0.0011	0.0013					0.0017		0.0151			0.0151	0.0168	0.0958	0	0	0	0	0.0646	0	8.607				1	TV	1	1	1	1
470	Female	1	1.37	5.7	4.32	0.32	0.29	0.65	1.3	1.15	1.13	2	0.0762	0.0173	0.0085	0.0009	0.0014							0.0162			0.0162	0.0162	0.06	0	0	0	0	0	0	9.234				1	TV	1	0	1	1
471	Male	2	1.71	6	4.52	0.27	0.25	0.6	1.4	1.2	1.44	2.15	0.0625	0.0216	0.0091	0.0011	0.0011							0.0053			0.0053	0.0053	0.0572	0	0	0	0	0	0	3.021				1	TV	1	1	1	1
472	Male	1	1.27	5.6	4.12	0.33	0.27	0.15	1.2	1	1.19	2.45	0.069	0.0214	0.0042	0.0014	0.0011							0.009			0.009	0.009	0.06	0	0	0	0	0	0	5.13				1	TV	1	1	1	1
473	Male	2	1.41	5.7	4.42	0.32	0.25	0.7	1.35	1.05	1.08	1.95	0.0871	0.028	0.0071	0.0008	0.0007							0.0143			0.0143	0.0143	0.0728	0	0	0	0	0	0	8.151				1	TV	1	1	1	1
474	Male	1	1.25	5.7	4.22	0.32	0.25	0.6	1.15	1	1.06	2.45	0.0565	0.0221	0.0038	0.0012	0.0014							0.0255			0.0255	0.0255	0.031	0	0	0	0	0	0	14.535				1	TV	1	1	1	1
475	Male	1	1.09	5.3	4.02	0.27	0.208	0.6	1.15	1.05	0.94	1.85	0.0909	0.0205	0.0034	0.0009	0.0011							0.0079			0.0079	0.0079	0.083	0	0	0	0	0	0	4.503				1	TV	1	1	1	1
476	Female	2	1.13	5.4	4.32	0.37	0.28	0.55	1.25	1.1	0.95	2.75	0.0646	0.0222	0.0091	0.0009	0.0013							0.0137			0.0137	0.0137	0.0509	0	0	0	0	0	0	7.809				1	TV	1	0	1	1
477	Female	1	0.92	5.1	3.82	0.25	0.27	0.6	1.15	0.95	0.77	1.85	0.1098	0.0158	0.0089	0.0006	0.0009							0.0088			0.0088	0.0088	0.101	0	0	0	0	0	0	5.016				1	TV	1	0	1	1
478	Male	1	1.24	5.6	4.22	0.3	0.29	0.65	1.35	1.1	1.03	2.65	0.0821	0.0265	0.0075	0.0011	0.0009					0.0015		0.0087			0.0087	0.0102	0.0719	0	0	0	0	0.057	0	4.959				1	TV	1	1	1	1
479	Female	1	1.41	5.8	4.22	0.33	0.32	0.6	1.35	1.2	1.09	2.95	0.0692	0.0268	0.0106	0.0008	0.0013							0.0072			0.0072	0.0072	0.062	0	0	0	0	0	0	4.104				1	TV	1	0	1	1
480	Female	1	2.51	6.5	4.96	0.37	0.33	1.05	1.35	1.5	2.02	3	0.1385	0.0391	0.017	0.0017	0.0018					0.002		0.0125			0.0125	0.0145	0.124	0	0	0	0	0.076	0	7.125				1	TV	1	0	1	1
481	Female	1	2.58	6.7	5.16	0.34	0.33	0.95	1.55	1.5	2.22	3	0.1372	0.0445	0.0107	0.0019	0.0021							0.0122			0.0122	0.0122	0.125	0	0	0	0	0	0	6.954				1	TV	1	0	1	1
482	Female	1	2.12	6.1	4.76	0.35	0.32	0.8	1.35	1.45	1.79	3.2	0.1174	0.0303	0.0097	0.002	0.0019	0.0019						0.0086			0.0086	0.0105	0.1069	0.2489	0	0	0	0	0	4.902				1	TV	1	0	1	1
483	Female	1	2.22	6.5	5.06	0.31	0.28	0.95	1.4	1.45	1.87	2.9	0.1575	0.0424	0.0082	0.002	0.0018	0.0238										0.0238	0.1337	3.1178	0	0	0	0	0	0				1	TV	1	0	1	1
484	Female	1	2.67	6.6	5.06	0.35	0.31	1.05	1.5	1.45	2.17	3.4	0.1766	0.0543	0.0117	0.0022	0.002							0.0361			0.0361	0.0361	0.1405	0	0	0	0	0	0	20.577				1	TV	1	0	1	1
485	Female	1	2.1	6.3	4.76	0.32	0.32	0.85	1.3	1.35	1.77	3	0.1145	0.0327	0.0081	0.0021	0.0018							0.0113			0.0113	0.0113	0.1032	0	0	0	0	0	0	6.441				2	TV	1	0	1	1
486	Male	2	1.95	6	4.46	0.33	0.27	0.9	1.35	1.4	1.64	3	0.1168	0.0379	0.0031	0.0022	0.0018							0.0146			0.0146	0.0146	0.1022	0	0	0	0	0	0	8.322				2	TV	1	1	1	1
487	Female	1	1.62	5.7	4.46	0.32	0.31	0.85	1.25	1.35	1.36	2.5	0.0866	0.0285	0.0061	0.0019	0.0016							0.0167			0.0167	0.0167	0.0699	0	0	0	0	0	0	9.519				2	TV	1	0	1	1
488	Female	1	2.8	6.9	5.36	0.38	0.29	0.95	1.4	1.55	2.33	2.6	0.1386	0.0406	0.0096	0.0021	0.0017							0.0151			0.0151	0.0151	0.1235	0	0	0	0	0	0	8.607				2	TV	1	0	1	1
489	Male	1	1.66	5.7	4.26	0.32	0.28	0.85	1.15	1.3	1.44	2.2	0.0954	0.0291	0.0035	0.0015	0.0018							0.0119			0.0119	0.0119	0.0835	0	0	0	0	0	0	6.783				2	TV	1	1	1	1
490	Male	2	1.85	5.7	4.36	0.3	0.3	0.85	1.15	1.35	1.59	2	0.1058	0.0409	0.0072	0.0016	0.0017							0.0091			0.0091	0.0091	0.0967	0	0	0	0	0	0	5.187				2	TV	1	1	1	1
491	Female	1	1.92	5.9	4.56	0.32	0.28	0.9	1.25	1.35	1.71	2.2	0.0992	0.0356	0.0106	0.0017	0.0018							0.0202			0.0202	0.0202	0.079	0	0	0	0	0	0	11.514				2	TV	1	0	1	1
492	Male	1	1.48	6	4.54	0.33	0.49	0.7	1.4	1.2	1.26	2.1	0.2014	0.0361	0.014	0.0014	0.0016							0.0104			0.0104	0.0104	0.191	0	0	0	0	0	0	5.928				2	TV	1	1	1	1
493	Male	1	1.63	6.1	4.44	0.32	0.49	0.85	1.35	1.25	1.37	2.2	0.0874	0.0292	0.0076	0.0012	0.0016							0.025			0.025	0.025	0.0624	0	0	0	0	0	0	14.25				2	TV	1	1	1	1
494	Male	1	1.48	6	4.44	0.32	0.21	0.8	1.45	1.3	1.27	2.4	0.1252	0.033	0.0102	0.0013	0.0015					0.0017		0.0151			0.0151	0.0168	0.1084	0	0	0	0	0.0646	0	8.607				2	TV	1	1	1	1
495	Female	1	1.47	5.9	4.34	0.34	0.49	0.75	1.4	1.3	1.23	2.15	0.0888	0.0298	0.0117	0.0011	0.0016							0.0162			0.0162	0.0162	0.0726	0	0	0	0	0	0	9.234				2	TV	1	0	1	1
496	Male	2	1.81	6.2	4.54	0.29	0.45	0.7	1.5	1.35	1.54	2.3	0.0751	0.0341	0.0123	0.0013	0.0013							0.0053			0.0053	0.0053	0.0698	0	0	0	0	0	0	3.021				2	TV	1	1	1	1
497	Male	1	1.37	5.8	4.14	0.35	0.47	0.25	1.3	1.15	1.29	2.6	0.0816	0.0339	0.0074	0.0016	0.0013							0.009			0.009	0.009	0.0726	0	0	0	0	0	0	5.13				2	TV	1	1	1	1
498	Male	2	1.51	5.9	4.44	0.34	0.45	0.8	1.45	1.2	1.18	2.1	0.0997	0.0405	0.0103	0.001	0.0009							0.0143			0.0143	0.0143	0.0854	0	0	0	0	0	0	8.151				2	TV	1	1	1	1
499	Male	1	1.35	5.9	4.24	0.34	0.45	0.7	1.25	1.15	1.16	2.6	0.0691	0.0346	0.007	0.0014	0.0016							0.0255			0.0255	0.0255	0.0436	0	0	0	0	0	0	14.535				2	TV	1	1	1	1
500	Male	1	1.19	5.5	4.04	0.29	0.408	0.7	1.25	1.2	1.04	2	0.1035	0.033	0.0066	0.0011	0.0013							0.0079			0.0079	0.0079	0.0956	0	0	0	0	0	0	4.503				2	TV	1	1	1	1
501	Female	2	1.23	5.6	4.34	0.39	0.48	0.65	1.35	1.25	1.05	2.9	0.0772	0.0347	0.0123	0.0011	0.0015							0.0137			0.0137	0.0137	0.0635	0	0	0	0	0	0	7.809				2	TV	1	0	1	1
502	Female	4	9.11	10.4	8.3	0.5	0.14	1.25	2.4	1.35	7.78	6.6	0.2829	0.1438	0.2244	0.0035	0.0052							0.0014			0.0014	0.0014	0.2815	0	0	0	0	0	0	0.798				4	CM	4	0	1	2
503	Male	3	9.9	10.2	8	0.49	0.18	1.35	2.15	1.3	8.54	5.1	0.2429	0.2474	0.0181	0.0044	0.0046											0	0.2429	0	0	0	0	0	0	0				4	CM	4	1	1	2
504	Male	4	5.94	8.9	7	0.42	0.17	0.95	2	1.3	5.12	4.8	0.1534	0.0996	0.0405	0.0027	0.0025						0.0009					0.0009	0.1525	0	0	0	0	0	0.1413	0				4	CM	4	1	1	2
505	Male	2	4.46	8	6.3	0.38	0.18	0.85	1.65	1.25	3.82	4.7	0.1049	0.0968	0.0049	0.0023	0.0029											0	0.1049	0	0	0	0	0	0	0				4	CM	4	1	1	1
506	Male	2	4.44	7.9	6.2	0.35	0.15	0.85	1.7	1.2	3.63	4.1	0.2274	0.1128	0.00741	0.0022	0.0025						0.0012					0.0012	0.2262	0	0	0	0	0	0.1884	0				4	CM	4	1	1	1
507	Female	2	6.16	8.4	6.8	0.38	0.11	0.9	1.8	1.15	5.06	5.3	0.1863	0.1308	0.0516	0.0023	0.0023							0.0008			0.0008	0.0008	0.1855	0	0	0	0	0	0	0.456				4	CM	4	0	1	2
508	Female	1	4.12	7.7	6.1	0.38	0.13	0.75	1.75	1.1	3.44	4.3	0.1321	0.0773	0.0266	0.0017	0.0016											0	0.1321	0	0	0	0	0	0	0				4	CM	4	0	1	2
509	Female	1	3.53	7.4	5.8	0.32	0.13	0.7	1.55	1.05	2.95	4.6	0.1115	0.0765	0.0179	0.0013	0.0013											0	0.1115	0	0	0	0	0	0	0				4	CM	4	0	1	2
510	Male	2	5.94	8.8	7	0.42	0.15	0.9	2.1	1.3	5.24	5.1	0.1577	0.0413	0.0027	0.0028	0.0031							0.0018			0.0018	0.0018	0.1559	0	0	0	0	0	0	1.026				4	CM	4	1	1	2
511	Male	2	6.8	8.8	7	0.4	0.16	1.05	1.95	1.35	5.84	5.5	0.16	0.0817	0.0049	0.0014	0.0017							0.0012			0.0012	0.0012	0.1588	0	0	0	0	0	0	0.684				4	CM	4	1	1	2
512	Female	1	4.46	8	6.4	0.34	0.11	0.85	1.8	1.15	3.8	4.7	0.1331	0.0666	0.034	0.0019	0.0025							0.0006			0.0006	0.0006	0.1325	0	0	0	0	0	0	0.342				4	CM	4	0	1	2
513	Male	1	4.1	7.8	6.1	0.35	0.1	0.95	1.75	1.1	3.45	2.3	0.112	0.0651	0.0095	0.002	0.002											0	0.112	0	0	0	0	0	0	0				4	CM	4	1	1	1
514	Female	2	5.22	8.5	6.7	0.4	0.12	1	1.85	1.15	4.45	5.8	0.1694	0.1333	0.0597	0.002	0.0019											0	0.1694	0	0	0	0	0	0	0				4	CM	4	0	1	2
515	Female	1	3.48	7.5	6	0.35	0.15	0.8	1.75	1.05	2.88	3.5	0.1271	0.0811	0.0125	0.0015	0.0013						0.0031					0.0031	0.124	0	0	0	0	0	0.4867	0				4	CM	4	0	1	2
516	Female	3	5.32	8.3	6.6	0.4	0.12	0.85	1.7	1.15	4.21	5.8	0.1729	0.1021	0.0758	0.0024	0.0024							0.0013			0.0013	0.0013	0.1716	0	0	0	0	0	0	0.741				4	CM	4	0	1	2
517	Male	2	4.27	7.8	6.1	0.35	0.12	0.95	1.75	1.15	3.68	3.2	0.1208	0.0447	0.007	0.0015	0.0023							0.0008			0.0008	0.0008	0.12	0	0	0	0	0	0	0.456				5	CM	4	1	1	1
518	Male	3	3.05	7.5	6	0.31	0.18	0.8	1.55	1.1	2.56	4.2	0.0985	0.0382	0.0169	0.0017	0.0016							0.0045			0.0045	0.0045	0.094	0	0	0	0	0	0	2.565				5	CM	4	1	1	1
519	Male	3	3.79	7.6	6.1	0.38	0.11	0.8	1.75	1.2	3.22	3.7	0.1205	0.0905	0.0046	0.0018	0.0016											0	0.1205	0	0	0	0	0	0	0				5	CM	4	1	1	1
520	Male	2	4.5	8	6.2	0.4	0.35	0.85	1.85	1.05	3.84	4.2	0.1288	0.0469	0.005	0.0019	0.0019											0	0.1288	0	0	0	0	0	0	0				5	CM	4	1	1	1
521	Female	1	2.57	6.7	5.2	0.39	0.12	0.65	1.6	1.1	2.04	3.1	0.1108	0.0573	0.0122	0.0015	0.0013											0	0.1108	0	0	0	0	0	0	0				5	CM	4	0	1	1
522	Female	1	3.68	7.6	6	0.39	0.15	0.75	1.5	1.05	2.93	4.5	0.1502	0.0146	0.0036	0.0015	0.0016	0.0006				0.0033	0.0089					0.0128	0.1374	0.0786	0	0	0	0.1254	1.3973	0				5	CM	4	0	1	2
523	Male	2	2.69	7	5.5	0.35	0.1	0.75	1.4	1.05	2.6	4	0.1216	0.0349	0.0022	0.0014	0.0011						0.0075					0.0075	0.1141	0	0	0	0	0	1.1775	0				5	CM	4	1	1	1
524	Male	1	2.24	6.5	5	0.32	0.1	0.65	1.55	0.9	1.4	3.3	0.0792	0.0403	0.0016	0.0013	0.0015						0.0036	0.0015			0.0015	0.0051	0.0741	0	0	0	0	0	0.5652	0.855				5	CM	4	1	1	1
525	Female	1	2.89	7.1	5.5	0.35	0.12	0.6	1.45	1.05	2.29	3.5	0.0842	0.0356	0.0156	0.0014	0.0013											0	0.0842	0	0	0	0	0	0	0				5	CM	4	0	1	2
526	Male	1	1.6	5.9	4.5	0.3	0.12	0.55	1.3	0.95	1.28	3.3	0.0716	0.0124	0.0018	0.001	0.0011											0	0.0716	0	0	0	0	0	0	0				5	CM	4	1	1	1
527	Male	1	1.62	5.9	4.4	0.31	0.12	0.65	1.25	0.9	1.25	2.7	0.0666	0.0146	0.0043	0.0011	0.0008											0	0.0666	0	0	0	0	0	0	0				5	CM	4	1	1	1
528	Female	1	1.25	5.7	4.4	0.3	0.11	0.5	1.1	0.95	0.97	2.7	0.0487	0.024	0.0016	0.0007	0.0005						0.0006					0.0006	0.0481	0	0	0	0	0	0.0942	0				5	CM	4	0	1	1
529	Male	1	2.06	6.5	5	0.29	0.09	0.65	1.35	1.05	1.67	3.4	0.0727	0.0262	0.0022	0.0011	0.0012							0.0051			0.0051	0.0051	0.0676	0	0	0	0	0	0	2.907				5	CM	4	1	1	1
530	Male	1	1.91	6.4	4.9	0.28	0.11	0.55	1.35	0.95	1.53	3	0.0742	0.0178	0.0029	0.0004	0.0012	0.0051										0.0051	0.0691	0.6681	0	0	0	0	0	0				5	CM	4	1	1	1
531	Female	1	1.86	5.7	4.3	0.24	0.11	0.55	1.2	0.85	1.03	2.6	0.05	0.0157	0.0067	0.008	0.0008							0.0008			0.0008	0.0008	0.0492	0	0	0	0	0	0	0.456				5	CM	4	0	1	1
532	Male	1	1.15	5.4	4.1	0.22	0.1	0.45	1.15	0.85	0.85	2.9	0.0543	0.0062	0.0028	0.0006	0.005							0.0013			0.0013	0.0013	0.053	0	0	0	0	0	0	0.741				5	CM	4	1	1	1
533	Female	1	1.27	5.6	4.2	0.3	0.07	0.5	1.25	0.85	1.04	2.7	0.058	0.0109	0.0031	0.0009	0.0012							0.0045			0.0045	0.0045	0.0535	0	0	0	0	0	0	2.565				5	CM	4	0	1	1
534	Female	1	3.16	7.6	6	0.4	0.25	1	2.1	0.75	3.17	3.9	0.1532	0.0249	0.0192	0.0017	0.0019											0	0.1532	0	0	0	0	0	0	0				6	CM	4	0	2	2
535	Male	3	6.19	8.7	6.9	0.45	0.25	1.35	1.9	0.9	5.44	3.8	0.1811	0.1167	0.0284	0.0022	0.0024											0	0.1811	0	0	0	0	0	0	0				6	CM	4	1	2	2
536	Male	2	4.38	8	6.3	0.4	0.2	1.1	1.7	0.8	3.76	4.1	0.1487	0.058	0.0109	0.0021	0.0021											0	0.1487	0	0	0	0	0	0	0				6	CM	4	1	2	1
537	Male	4	8.66	9.8	7.8	0.5	0.25	1.8	2.15	1	7.75	5.3	0.193	0.1644	0.0235	0.004	0.0036											0	0.193	0	0	0	0	0	0	0				6	CM	4	1	2	2
538	Male	2	3.4	7.5	5.8	0.4	0.15	1	1.5	0.75	3.05	4.2	0.1165	0.0574	0.0074	0.0015	0.0015											0	0.1165	0	0	0	0	0	0	0				6	CM	4	1	2	1
539	Male	3	5.81	8.5	6.6	0.45	0.2	1.45	1.9	0.9	5.03	4.5	0.2713	0.0854	0.0185	0.0026	0.0024											0	0.2713	0	0	0	0	0	0	0				6	CM	4	1	2	1
540	Female	4	5.2	8.6	6.7	0.45	0.2	1.1	1.9	0.8	4.51	4.2	0.1769	0.0891	0.1459	0.0025	0.0023											0	0.1769	0	0	0	0	0	0	0				6	CM	4	0	2	2
541	Female	4	5.81	8.9	7	0.5	0.25	1.4	2.1	0.8	4.85	4.6	0.2504	0.0951	0.1764	0.002	0.0023											0	0.2504	0	0	0	0	0	0	0				6	CM	4	0	2	2
542	Female	4	6.15	8.7	7	0.4	0.2	1.4	1.8	0.85	5.04	5.2	0.1328	0.0829	0.4411	0.0022	0.0025											0	0.1328	0	0	0	0	0	0	0				6	CM	4	0	2	2
543	Female	4	7.03	9.2	7.4	0.45	0.25	1.3	2	0.85	5.93	5.1	0.186	0.1115	0.2077	0.0018	0.0021											0	0.186	0	0	0	0	0	0	0				6	CM	4	0	2	2
544	Female	1	2.57	6.9	5.5	0.35	0.2	0.9	1.4	0.65	2.19	3.8	0.072	0.0216	0.0153	0.0014	0.0013											0	0.072	0	0	0	0	0	0	0				6	CM	4	0	2	2
545	Female	1	3.39	7.3	5.7	0.4	0.2	1	1.6	0.7	2.89	3.6	0.1001	0.0499	0.027	0.0024	0.0018											0	0.1001	0	0	0	0	0	0	0				6	CM	4	0	2	2
546	Female	2	5.34	8.5	6.8	0.45	0.25	1.1	1.75	0.8	4.63	4.3	0.138	0.1128	0.0426	0.0012	0.0009											0	0.138	0	0	0	0	0	0	0				6	CM	4	0	2	2
547	Male	1	2.42	6.7	5.4	0.4	0.2	0.9	1.5	0.6	2.08	2.9	0.115	0.0139	0.0057	0.002	0.0024											0	0.115	0	0	0	0	0	0	0				6	CM	4	1	2	1
548	Female	2	5.86	8.7	6.8	0.4	0.25	1.2	1.9	0.8	5.02	4.6	0.2394	0.1473	0.0423	0.0014	0.001											0	0.2394	0	0	0	0	0	0	0				6	CM	4	0	2	2
549	Male	1	1.16	5.4	4	0.35	0.15	0.8	1.1	0.5	0.99	2.8	0.0383	0.0138	0.003	0.0033	0.0035											0	0.0383	0	0	0	0	0	0	0				6	CM	4	1	2	1
550	Male	2	8	9.5	7.6	0.55	0.25	1.45	2.3	1	7.15	4.7	0.1675	0.1602	0.019	0.003	0.0025											0	0.1675	0	0	0	0	0	0	0				6	CM	4	1	2	2
551	Male	2	4.88	8.3	6.5	0.5	0.25	1.1	1.85	0.8	4.34	3.9	0.1234	0.0747	0.0271	0.0023	0.0026											0	0.1234	0	0	0	0	0	0	0				6	CM	4	1	2	1
552	Female	4	6.51	9	7.2	0.5	0.25	1.35	2	0.85	5.36	4.5	0.1709	0.0802	0.4167	0.0027	0.0023											0	0.1709	0	0	0	0	0	0	0				6	CM	4	0	2	2
553	Female	4	7.26	9.3	7.4	0.45	0.25	1.35	2.1	0.9	5.98	5	0.1922	0.1237	0.1538	0.0032	0.0024											0	0.1922	0	0	0	0	0	0	0				6	CM	4	0	2	2
554	Male	3	5.59	9.5	6.8	0.45	0.25	1.2	1.9	0.85	4.92	4.6	0.1981	0.0428	0.0181	0.0021	0.0019											0	0.1981	0	0	0	0	0	0	0				6	CM	4	1	2	2
555	Male	2	4.19	8	6.3	0.4	0.2	1.1	1.7	0.85	3.64	2.9	0.1502	0.0539	0.0228	0.0009	0.0007											0	0.1502	0	0	0	0	0	0	0				6	CM	4	1	2	1
556	Female	1	2.8	7.2	5.6	0.35	0.2	0.9	1.5	0.7	2.43	2.8	0.0878	0.0423	0.0188	0.0015	0.0017											0	0.0878	0	0	0	0	0	0	0				6	CM	4	0	2	2
557	Male	2	3.72	7.7	6	0.4	0.2	1	1.6	0.65	3.26	3	0.1041	0.0584	0.0076	0.0012	0.0012											0	0.1041	0	0	0	0	0	0	0				6	CM	4	1	2	1
558	Male	2	3.99	7.6	6	0.4	0.2	1	1.7	0.7	3.44	3.5	0.1341	0.1004	0.0073	0.0015	0.0014											0	0.1341	0	0	0	0	0	0	0				6	CM	4	1	2	1
559	Female	3	6.24	8.7	7	0.37	0.1	0.95	1.85	1.15	5.23	6.8	0.2598	0.0756	0.1648	0.0029	0.003							0.0703			0.0703	0.0703	0.1895	0	0	0	0	0	0	40.071				7	CM	4	0	2	2
560	Male	4	7.52	8.2	7.1	0.45	0.21	1.05	2	1.1	6.77	5.6	0.1926	0.0774	0.0178	0.0038	0.0037				0.0612			0.0266			0.0266	0.0878	0.1048	0	0	0	5.6916	0	0	15.162				7	CM	4	1	2	1
561	Male	3	6.75	9	7.3	0.48	0.13	1.1	2	0.95	5.98	4.8	0.2393	0.0612	0.0257	0.0041	0.004		0.0953					0.1195			0.1195	0.2148	0.0245	0	1.906	0	0	0	0	68.115				7	CM	4	1	2	2
562	Female	5	5.23	7.9	6.4	0.4	0.22	1.1	1.7	1.1	4.05	4.9	0.1418	0.0565	0.6448	0.0022	0.0025							0.0444			0.0444	0.0444	0.0974	0	0	0	0	0	0	25.308				7	CM	4	0	2	2
563	Female	5	5.73	8.6	7	0.4	0.12	1.15	1.8	1.05	4.47	4.5	0.1861	0.0353	0.5876	0.0024	0.0022							0.0438			0.0438	0.0438	0.1423	0	0	0	0	0	0	24.966				7	CM	4	0	2	2
564	Female	4	5.04	8.3	6.6	0.36	0.13	1.1	1.85	1.15	4.19	4.5	0.2164	0.0384	0.1659	0.0026	0.0025							0.1176			0.1176	0.1176	0.0988	0	0	0	0	0	0	67.032				7	CM	4	0	2	2
565	Male	4	6.97	9.2	7.5	0.45	0.23	1.05	2.1	1.15	5.93	5.5	0.3774	0.0284	0.0291	0.0035	0.0036							0.1114			0.1114	0.1114	0.266	0	0	0	0	0	0	63.498				7	CM	4	1	2	2
566	Male	4	5.01	8.2	6.6	0.39	0.18	0.85	1.7	1.2	4.16	5.4	0.3297	0.0221	0.0176	0.0017	0.002											0	0.3297	0	0	0	0	0	0	0				7	CM	4	1	2	1
567	Female	4	4.02	7.7	6.4	0.41	0.14	0.75	1.65	1	3.23	4.9	0.1946	0.0953	0.2223	0.0029	0.0026	0.0412						0.0575			0.0575	0.0987	0.0959	5.3972	0	0	0	0	0	32.775				7	CM	4	0	2	2
568	Female	4	7.03	9.4	7.6	0.44	0.29	1.05	2.05	1.05	6.03	5.4	0.1525	0.0556	0.427	0.0022	0.0024											0	0.1525	0	0	0	0	0	0	0				7	CM	4	0	2	2
569	Female	4	9.11	9.9	8	0.45	0.2	1.25	2.2	1.25	7.64	6.6	0.3618	0.0647	0.5383	0.0036	0.003	0.0506						0.0257			0.0257	0.0763	0.2855	6.6286	0	0	0	0	0	14.649				7	CM	4	0	2	2
570	Male	3	6.14	8.9	7.2	0.43	0.21	1.1	1.9	1.15	5.46	5.5	0.2464	0.0448	0.0102	0.0022	0.0022				0.0449			0.059			0.059	0.1039	0.1425	0	0	0	4.1757	0	0	33.63				7	CM	4	1	2	2
571	Male	3	6	8.5	6.9	0.41	0.22	1.05	2	1.2	5.33	4.3	0.141	0.1836	0.0174	0.0024	0.0025							0.0202			0.0202	0.0202	0.1208	0	0	0	0	0	0	11.514				7	CM	4	1	2	1
572	Male	4	7.69	9.5	7.8	0.48	0.23	1	2.05	1.15	6.95	4.6	0.1755	0.0914	0.0144	0.0035	0.0031	0.0268										0.0268	0.1487	3.5108	0	0	0	0	0	0				7	CM	4	1	2	2
573	Male	4	6.33	8.5	7	0.49	0.18	0.85	1.65	1.05	5.3	5.3	0.2277	0.0675	0.02	0.0018	0.0017							0.0228			0.0228	0.0228	0.2049	0	0	0	0	0	0	12.996				7	CM	4	1	2	1
574	Male	3	4.79	8.1	6.5	0.42	0.221	0.85	1.8	0.95	4.25	4.5	0.1493	0.0489	0.0086	0.002	0.0023											0	0.1493	0	0	0	0	0	0	0				7	CM	4	1	2	1
575	Female	5	7.47	9.2	7.4	0.42	0.19	1.2	1.9	1.25	5.96	4.5	0.1973	0.0659	0.7611	0.0015	0.0014											0	0.1973	0	0	0	0	0	0	0				7	CM	4	0	2	2
576	Female	4	6.7	8.7	6.8	0.43	0.17	0.9	1.9	1.25	5.52	6.5	0.3148	0.0523	0.1467	0.0033	0.0032							0.1345			0.1345	0.1345	0.1803	0	0	0	0	0	0	76.665				7	CM	4	0	2	2
577	Male	3	6.04	8.9	7	0.4	0.28	1.1	1.85	1.05	5.42	4.7	0.2285	0.0679	0.0126	0.0029	0.0028				0.0991							0.0991	0.1294	0	0	0	9.2163	0	0	0				7	CM	4	1	2	2
578	Male	4	5.31	8.8	7.1	0.43	0.19	0.9	2	1.15	4.67	5.7	0.2692	0.0729	0.0182	0.0035	0.0032							0.1612			0.1612	0.1612	0.108	0	0	0	0	0	0	91.884				7	CM	4	1	2	2
579	Male	3	6.86	9.5	7.7	0.41	0.15	0.95	2.15	1.22	6.13	4.1	0.2633	0.0648	0.0228	0.0039	0.0038											0	0.2633	0	0	0	0	0	0	0				7	CM	4	1	2	2
580	Female	5	5.87	8.4	6.7	0.4	0.18	1.05	1.85	1.05	4.44	5.4	0.1313	0.0831	0.7809	0.0013	0.0012											0	0.1313	0	0	0	0	0	0	0				7	CM	4	0	2	2
581	Male	4	6	8.8	7	0.43	0.22	0.95	1.9	1.15	5.43	5	0.1444	0.1174	0.0258	0.003	0.0028							0.0324			0.0324	0.0324	0.112	0	0	0	0	0	0	18.468				7	CM	4	1	2	2
582	Female	4	5.62	8.5	6.7	0.38	0.13	0.9	1.85	1.05	4.68	5.7	0.2981	0.1026	0.1751	0.0032	0.0035											0	0.2981	0	0	0	0	0	0	0				7	CM	4	0	2	2
583	Female	3	4.97	8.5	6.9	0.37	0.18	0.85	1.75	0.95	4.47	4	0.1002	0.0395	0.0433	0.0022	0.0022											0	0.1002	0	0	0	0	0	0	0				7	CM	4	0	2	2
584	Male	3	6.16	8.2	7.4	0.36	0.17	0.9	1.85	1.05	5.28	6.4	0.3724	0.0886	0.0083	0.003	0.0032							0.1565			0.1565	0.1565	0.2159	0	0	0	0	0	0	89.205				7	CM	4	1	2	1
585	Male	2	4.3	8	6.5	0.39	0.12	0.8	1.82	1.05	3.81	4.4	0.1805	0.0325	0.0122	0.0022	0.0021							0.0499			0.0499	0.0499	0.1306	0	0	0	0	0	0	28.443				7	CM	4	1	2	1
586	Female	3	3.51	7.3	5.8	0.4	0.15	0.7	1.6	1.05	2.9	5.4	0.218	0.0477	0.0706	0.0024	0.0025				0.0425							0.0425	0.1755	0	0	0	3.9525	0	0	0				7	CM	4	0	2	2
587	Male	2	2.47	6.8	5.4	0.33	0.21	0.75	1.4	0.95	2.11	3.3	0.1437	0.0312	0.0117	0.0005	0.0007					0.0934						0.0934	0.0503	0	0	0	0	3.5492	0	0				7	CM	4	1	2	1
588	Female	1	1.67	6	4.6	0.28	0.16	0.6	1.25	0.85	1.41	3.5	0.0792	0.0237	0.0126	0.0016	0.0015							0.0151			0.0151	0.0151	0.0641	0	0	0	0	0	0	8.607				7	CM	4	0	2	1
589	Female	2	6.44	8.6	7.2	0.44	0.2	0.9	1.95	1.1	5.14	7.8	0.5057	0.114	0.0819	0.0025	0.003							0.2255			0.2255	0.2255	0.2802	0	0	0	0	0	0	128.535				7	CM	4	0	2	2
590	Male	4	5.73	8.5	7.1	0.35	0.18	0.9	1.95	1.05	4.76	5.1	0.3427	0.0353	0.0067	0.0022	0.002	0.0542						0.14			0.14	0.1942	0.1485	7.1002	0	0	0	0	0	79.8				8	CM	4	1	2	1
591	Male	2	4.95	8	6.7	0.31	0.19	0.95	1.65	1	4.25	3.5	0.0779	0.1515	0.0016	0.002	0.0018											0	0.0779	0	0	0	0	0	0	0				8	CM	4	1	2	1
592	Female	5	9.53	9.6	7.7	0.49	0.3	1.35	2.25	1.15	7.35	7.4	0.401	0.1232	0.9595	0.0027	0.0028							0.0803			0.0803	0.0803	0.3207	0	0	0	0	0	0	45.771				8	CM	4	0	2	2
593	Female	2	6.17	8.6	7.1	0.4	0.25	1.1	1.9	1.2	4.92	6.1	0.3431	0.0863	0.0027	0.0025	0.0023				0.0724			0.0529			0.0529	0.1253	0.2178	0	0	0	6.7332	0	0	30.153				8	CM	4	0	2	2
594	Male	2	4.26	7.9	6.4	0.32	0.13	0.9	1.65	0.95	3.45	6.3	0.3189	0.0548	0.0031	0.0022	0.0023							0.1594			0.1594	0.1594	0.1595	0	0	0	0	0	0	90.858				8	CM	4	1	2	1
595	Male	4	6.81	8.9	7.3	0.35	0.17	1.1	1.9	1.1	5.68	5.1	0.4262	0.1205	0.0361	0.003	0.0028							0.1513			0.1513	0.1513	0.2749	0	0	0	0	0	0	86.241				8	CM	4	1	2	2
596	Male	3	3.22	7.5	6.1	0.35	0.15	0.9	1.45	0.9	2.67	4.8	0.1674	0.0423	0.0148	0.0021	0.0017							0.0862			0.0862	0.0862	0.0812	0	0	0	0	0	0	49.134				8	CM	4	1	2	1
597	Male	3	6.93	8.6	7.2	0.4	0.22	1.05	1.95	1.15	5.96	4.2	0.2062	0.1311	0.0176	0.0024	0.0027											0	0.2062	0	0	0	0	0	0	0				8	CM	4	1	2	1
598	Female	4	5.51	8.4	6.7	0.34	0.18	1.1	1.7	1	4.27	5.5	0.4138	0.0675	0.3889	0.0028	0.0025				0.0658			0.0437			0.0437	0.1095	0.3043	0	0	0	6.1194	0	0	24.909				8	CM	4	0	2	2
599	Male	2	3.86	7.5	6.1	0.38	0.14	0.9	1.55	1	3.31	5.4	0.2015	0.0425	0.003	0.0017	0.0015							0.0286			0.0286	0.0286	0.1729	0	0	0	0	0	0	16.302				8	CM	4	1	2	1
600	Female	3	5.08	7.7	6.4	0.42	0.28	0.95	1.75	1.1	4.14	5.5	0.2852	0.0937	0.1378	0.0026	0.0027							0.0633			0.0633	0.0633	0.2219	0	0	0	0	0	0	36.081				8	CM	4	0	2	2
601	Female	4	5.14	8	6.6	0.37	0.22	1.05	1.75	0.95	4.02	6.3	0.3558	0.0477	0.3259	0.0023	0.0025							0.0592			0.0592	0.0592	0.2966	0	0	0	0	0	0	33.744				8	CM	4	0	2	2
602	Male	3	4.71	8	6.3	0.34	0.21	1.05	1.75	1.05	4.02	5.3	0.3828	0.0633	0.0109	0.0016	0.0015							0.1531			0.1531	0.1531	0.2297	0	0	0	0	0	0	87.267				8	CM	4	1	2	1
603	Male	3	5.65	8.6	7.1	0.4	0.22	1	1.85	1.05	4.81	6.7	0.3585	0.0759	0.0121	0.0025	0.0023							0.1111			0.1111	0.1111	0.2474	0	0	0	0	0	0	63.327				8	CM	4	1	2	1
604	Female	3	4.34	7.6	6.1	0.32	0.23	0.95	1.65	1	3.3	6.8	0.3859	0.0799	0.1217	0.0014	0.0016							0.1155			0.1155	0.1155	0.2704	0	0	0	0	0	0	65.835				8	CM	4	0	2	2
605	Male	2	4.59	8	6.5	0.4	0.2	0.85	1.7	1	3.88	6.8	0.3127	0.0668	0.0102	0.0022	0.0026							0.2083			0.2083	0.2083	0.1044	0	0	0	0	0	0	118.731				8	CM	4	1	2	1
606	Male	4	6.63	8.7	6.8	0.41	0.23	1.05	1.9	1.05	5.73	6.7	0.3941	0.0967	0.0192	0.0022	0.0024							0.119			0.119	0.119	0.2751	0	0	0	0	0	0	67.83				8	CM	4	1	2	2
607	Male	2	2.34	6.5	5.2	0.29	0.18	0.7	1.5	0.9	1.89	5.1	0.2089	0.0178	0.001	0.0015	0.002							0.1024			0.1024	0.1024	0.1065	0	0	0	0	0	0	58.368				8	CM	4	1	2	1
608	Male	1	1.78	5.8	4.7	0.3	0.11	0.7	1.25	0.85	1.43	3.1	0.1347	0.0309	0.0048	0.0009	0.001	0.086										0.086	0.0487	11.266	0	0	0	0	0	0				8	CM	4	1	2	1
609	Male	4	2.45	6.7	5.4	0.33	0.18	0.75	1.35	0.85	2.42	4.5	0.1432	0.0283	0.0012	0.0011	0.0009							0.0388			0.0388	0.0388	0.1044	0	0	0	0	0	0	22.116				8	CM	4	1	2	1
610	Male	1	1.68	6.1	4.9	0.29	0.16	0.55	1.35	0.8	1.3	3.4	0.0866	0.0161	0.0025	0.0006	0.0005						0.0396					0.0396	0.047	0	0	0	0	0	6.2172	0				8	CM	4	1	2	1
611	Female	4	7.77	8.9	7.3	0.38	0.24	1.3	1.9	1.05	6.1	4.8	0.251	0.064	0.3986	0.0021	0.0023	0.0377				0.0311		0.0859			0.0859	0.1547	0.0963	4.9387	0	0	0	1.1818	0	48.963				9	CM	4	0	2	2
612	Female	4	10.28	9.5	8.6	0.5	0.32	1.32	1.45	1.2	8.52	8.6	0.1578	0.0423	0.2699	0.0038	0.0039				0.0122		0.0402					0.0524	0.1054	0	0	0	1.1346	0	6.3114	0				9	CM	4	0	2	2
613	Male	2	6.75	8.7	7.4	0.35	0.2	0.15	1.95	1.2	5.82	5.2	0.5648	0.1147	0.0125	0.0026	0.0023							0.0241			0.0241	0.0241	0.5407	0	0	0	0	0	0	13.737				9	CM	4	1	2	2
614	Female	5	8.04	8.9	7.4	0.33	0.23	1.35	1.85	1.05	6.29	3.8	0.2176	0.0949	0.6964	0.0012	0.0014							0.1175			0.1175	0.1175	0.1001	0	0	0	0	0	0	66.975				9	CM	4	0	2	2
615	Male	1	5.01	7.9	6.4	0.36	0.19	0.95	1.75	1.05	4.17	2.6	0.351	0.076	0.0025	0.0027	0.0028	0.0591										0.0591	0.2919	7.7421	0	0	0	0	0	0				9	CM	4	1	2	1
616	Male	1	7.93	8.8	7.2	0.37	0.25	1.25	1.05	1	6.79	3.2	0.1858	0.1771	0.0067	0.0026	0.0022	0.0246										0.0246	0.1612	3.2226	0	0	0	0	0	0				9	CM	4	1	2	2
617	Female	4	6.32	8.4	6.8	0.34	0.17	1.35	1.95	1.05	5.07	4.3	0.2999	0.1325	0.4436	0.0024	0.002	0.0537										0.0537	0.2462	7.0347	0	0	0	0	0	0				9	CM	4	0	2	2
618	Female	4	6.49	8.6	6.9	0.3	0.14	1.1	1.95	1.05	5.05	3.7	0.2494	0.1941	0.3723	0.0028	0.0027	0.038										0.038	0.2114	4.978	0	0	0	0	0	0				9	CM	4	0	2	2
619	Male	3	7.35	8.9	7.3	0.38	0.18	1.25	2	1.15	6.5	3.2	0.2179	0.0795	0.0088	0.0025	0.0023		0.0859					0.0327			0.0327	0.1186	0.0993	0	1.718	0	0	0	0	18.639				9	CM	4	1	2	2
620	Male	3	6.05	8.4	6.8	0.35	0.19	1.05	1.85	1.05	5.24	5.5	0.2784	0.0763	0.0151	0.003	0.0031	0.1259						0.0682			0.0682	0.1941	0.0843	16.4929	0	0	0	0	0	38.874				9	CM	4	1	2	1
621	Male	4	6.08	8.5	6.9	0.35	0.21	0.85	1.8	1.15	5.23	7	0.4653	0.1143	0.0348	0.0014	0.0013				0.0539			0.0551			0.0551	0.109	0.3563	0	0	0	5.0127	0	0	31.407				9	CM	4	1	2	1
622	Female	2	6.52	8.6	7.1	0.35	0.19	1	1.95	1.15	5.35	5.1	0.3023	0.0898	0.0966	0.0016	0.0018	0.1384										0.1384	0.1639	18.1304	0	0	0	0	0	0				9	CM	4	0	2	2
623	Female	4	6.11	8.6	7.2	0.32	0.22	0.95	1.8	1	5.01	3.5	0.261	0.0629	0.2307	0.0021	0.0021				0.1443							0.1443	0.1167	0	0	0	13.4199	0	0	0				9	CM	4	0	2	2
624	Male	2	6.29	8.4	6.7	0.35	0.2	1.05	1.95	1	5.37	4.5	0.3656	0.1203	0.0082	0.0024	0.0026	0.0348										0.0348	0.3308	4.5588	0	0	0	0	0	0				9	CM	4	1	2	1
625	Male	2	7.02	9.2	7.3	0.41	0.2	0.95	1.85	1.05	6.1	3.5	0.2314	0.0816	0.0039	0.0024	0.0024					0.0681						0.0681	0.1633	0	0	0	0	2.5878	0	0				9	CM	4	1	2	2
626	Male	2	5.09	7.8	6.4	0.37	0.18	0.85	1.75	1.05	4.41	5.3	0.2951	0.0625	0.0157	0.0025	0.00027				0.1086							0.1086	0.1865	0	0	0	10.0998	0	0	0				9	CM	4	1	2	1
627	Male	2	4.84	7.8	6.4	0.42	0.25	0.9	1.75	0.9	4.09	4.7	0.3026	0.0939	0.0023	0.0021	0.0018							0.1215			0.1215	0.1215	0.1811	0	0	0	0	0	0	69.255				9	CM	4	1	2	1
628	Female	4	8.3	6.7	5.3	0.2	0.095	1.85	0.95	0.1	5.11	2.8	0.1334	0.0797	0.3543	0.0015	0.0018				0.0633							0.0633	0.0701	0	0	0	5.8869	0	0	0				9	CM	4	0	2	1
629	Male	3	4.24	7.6	6.2	0.35	0.15	0.85	1.6	0.9	3.68	4.7	0.4743	0.0726	0.0105	0.0014	0.0015											0	0.4743	0	0	0	0	0	0	0				9	CM	4	1	2	1
630	Female	4	6.46	8.4	6.9	0.33	0.15	0.95	1.75	1.05	5.22	4	0.3016	0.1169	0.2719	0.0022	0.0023	0.0013						0.0569			0.0569	0.0582	0.2434	0.1703	0	0	0	0	0	32.433				9	CM	4	0	2	2
631	Female	2	3.71	7.5	5.9	0.43	0.16	0.8	1.75	1.1	3.1	5.6	0.2294	0.0591	0.072	0.0028	0.0029						0.0116	0.1508			0.1508	0.1624	0.067	0	0	0	0	0	1.8212	85.956				10	CM	4	0	2	2
632	Male	3	2.67	7	5.5	0.36	0.22	0.85	1.55	1	2.31	3.5	0.1541	0.0416	0.0131	0.0009	0.0011											0	0.1541	0	0	0	0	0	0	0				10	CM	4	1	2	1
633	Female	1	1.77	6.1	4.8	0.3	0.18	0.8	1.35	0.95	1.56	3.65	0.0918	0.0362	0.0158	0.0018	0.0017	0.0036						0.0414			0.0414	0.045	0.0468	0.4716	0	0	0	0	0	23.598				10	CM	4	0	2	1
634	Female	2	6.54	8.7	7.4	0.46	0.22	1.1	2.05	1.2	5.29	7.95	0.5183	0.1265	0.0851	0.0027	0.0032	0.0126			0.0123			0.0263			0.0263	0.0512	0.4671	1.6506	0	0	1.1439	0	0	14.991				10	CM	4	0	2	2
635	Male	3	5.83	8.6	7.3	0.37	0.2	1.1	2.05	1.15	4.91	5.25	0.3553	0.0478	0.0099	0.0024	0.0022							0.061			0.061	0.061	0.2943	0	0	0	0	0	0	34.77				10	CM	4	1	2	1
636	Male	3	5.05	8.1	6.9	0.33	0.21	1.15	1.75	1.1	4.4	3.65	0.0905	0.164	0.0048	0.0022	0.002			0.0163								0.0163	0.0742	0	0	1.2877	0	0	0	0				10	CM	4	1	2	1
637	Female	5	9.63	9.7	7.9	0.51	0.32	1.55	2.35	1.25	7.5	7.55	0.4136	0.1357	0.9627	0.0029	0.003	0.0126										0.0126	0.401	1.6506	0	0	0	0	0	0				10	CM	4	0	2	2
638	Female	1	6.37	8.8	7.2	0.43	0.26	1.2	2.05	1.25	5.12	6.3	0.3545	0.0977	0.0041	0.0029	0.0027							0.1088			0.1088	0.1088	0.2457	0	0	0	0	0	0	62.016				10	CM	4	0	2	2
639	Male	3	4.46	8.1	6.5	0.35	0.14	1	1.8	1	3.65	6.5	0.3303	0.0662	0.0045	0.0026	0.0027	0.0236										0.0236	0.3067	3.0916	0	0	0	0	0	0				10	CM	4	1	2	1
640	Male	3	7.01	9.1	7.4	0.38	0.18	1.2	2.05	1.15	5.88	5.3	0.4376	0.1319	0.0375	0.0034	0.0032											0	0.4376	0	0	0	0	0	0	0				10	CM	4	1	2	2
641	Male	3	3.42	7.7	6.2	0.38	0.16	1	1.6	0.95	2.87	5	0.1788	0.0537	0.0162	0.0025	0.0021						0.0112					0.0112	0.1676	0	0	0	0	0	1.7584	0				10	CM	4	1	2	1
642	Male	3	7.13	8.8	7.3	0.43	0.23	1.15	2.1	1.2	6.16	4.4	0.2176	0.1425	0.019	0.0028	0.0031				0.0125			0.1001			0.1001	0.1126	0.105	0	0	0	1.1625	0	0	57.057				11	CM	4	1	2	2
643	Female	5	5.71	8.6	6.8	0.37	0.19	1.2	1.85	1.05	4.47	5.7	0.4252	0.0789	0.3903	0.0032	0.0029											0	0.4252	0	0	0	0	0	0	0				11	CM	4	0	2	2
644	Male	2	4.06	7.7	6.2	0.41	0.15	1	1.7	1.05	3.51	5.6	0.2129	0.0539	0.0044	0.0021	0.0019							0.1088			0.1088	0.1088	0.1041	0	0	0	0	0	0	62.016				11	CM	4	1	2	1
645	Female	3	5.28	7.9	6.5	0.45	0.29	1.05	1.9	1.15	4.34	5.7	0.2966	0.1051	0.1392	0.003	0.0031	0.0021		0.0163								0.0184	0.2782	0.2751	0	1.2877	0	0	0	0				11	CM	4	0	2	2
646	Female	4	5.34	8.2	6.7	0.4	0.23	1.15	1.9	1	4.22	6.5	0.3672	0.0591	0.3273	0.0027	0.0029							0.0569			0.0569	0.0569	0.3103	0	0	0	0	0	0	32.433				11	CM	4	0	2	2
647	Male	2	4.91	8.2	6.4	0.37	0.22	1.15	1.9	1.1	4.22	5.5	0.3942	0.0747	0.0123	0.002	0.0019							0.1508			0.1508	0.1508	0.2434	0	0	0	0	0	0	85.956				11	CM	4	1	2	1
648	Male	4	5.85	8.8	7.2	0.43	0.23	1.1	2	1.1	5.01	6.9	0.3699	0.0873	0.0135	0.0029	0.0027	0.018										0.018	0.3519	2.358	0	0	0	0	0	0				11	CM	4	1	2	2
649	Female	3	4.54	7.8	6.2	0.35	0.24	1.05	1.8	1.05	3.5	7	0.3973	0.0913	0.1231	0.0018	0.002							0.1132			0.1132	0.1132	0.2841	0	0	0	0	0	0	64.524				11	CM	4	0	2	2
650	Male	2	4.79	8.2	6.6	0.43	0.21	0.95	1.85	1.05	4.08	7	0.3241	0.0782	0.0116	0.0026	0.003				0.0054			0.206			0.206	0.2114	0.1127	0	0	0	0.5022	0	0	117.42				11	CM	4	1	2	1
651	Male	4	6.83	8.9	6.9	0.44	0.24	1.15	2.05	1.1	5.93	6.9	0.4055	0.1081	0.0206	0.0026	0.0028						0.0085					0.0085	0.397	0	0	0	0	0	1.3345	0				11	CM	4	1	2	2
652	Male	2	2.54	6.7	5.3	0.32	0.19	0.8	1.65	0.95	2.09	5.3	0.2203	0.0292	0.0024	0.0019	0.0024											0	0.2203	0	0	0	0	0	0	0				11	CM	4	1	2	1
653	Male	1	1.98	6	4.8	0.33	0.12	0.8	1.4	0.9	1.63	3.3	0.1461	0.0423	0.0062	0.0013	0.0014						0.0125	0.0125	0.0125			0.025	0.1336	0	0	0	0	0	1.9625	7.125				11	CM	4	1	2	1
654	Male	3	2.65	6.9	5.5	0.36	0.19	0.85	1.5	0.9	2.62	4.7	0.1546	0.0397	0.0026	0.0015	0.0013											0	0.1546	0	0	0	0	0	0	0				11	CM	4	1	2	1
655	Male	1	1.88	6.3	5	0.32	0.17	0.65	1.5	0.85	1.5	3.6	0.097	0.0265	0.0039	0.001	0.0009											0	0.097	0	0	0	0	0	0	0				11	CM	4	1	2	1
656	Female	4	7.97	9.1	7.4	0.41	0.25	1.4	2.05	1.1	6.3	5	0.2614	0.0744	0.4	0.0025	0.0027											0	0.2614	0	0	0	0	0	0	0				11	CM	4	0	2	2
657	Female	4	10.48	10.2	8.7	0.53	0.33	1.42	1.6	1.25	8.72	8.8	0.0682	0.0527	0.2713	0.0042	0.0004	0.0128						0.0206			0.0206	0.0334	0.0348	1.6768	0	0	0	0	0	11.742				11	CM	4	0	2	2
658	Male	2	6.95	8.9	7.5	0.38	0.21	0.25	2.1	1.25	6.02	5.4	0.5752	0.1251	0.0139	0.003	0.0027							0.1167			0.1167	0.1167	0.4585	0	0	0	0	0	0	66.519				11	CM	4	1	2	2
659	Female	5	8.24	9.1	7.5	0.36	0.24	1.45	2	1.1	6.49	4	0.228	0.1053	0.6978	0.0016	0.0018	0.0215										0.0215	0.2065	2.8165	0	0	0	0	0	0				12	CM	4	0	2	2
660	Male	1	5.21	8.1	6.5	0.39	0.2	1.05	1.9	1.1	4.37	2.8	0.3614	0.0864	0.0039	0.0031	0.0032	0.011					0.0069					0.0179	0.3435	1.441	0	0	0	0	1.0833	0				12	CM	4	1	2	1
661	Male	1	8.13	9	7.3	0.4	0.26	1.35	1.2	0.05	6.99	3.4	0.1962	0.1875	0.0081	0.003	0.0026	0.0022										0.0022	0.194	0.2882	0	0	0	0	0	0				12	CM	4	1	2	2
662	Female	4	6.42	8.5	7	0.36	0.19	1.55	2.05	1.15	5.22	4.45	0.3125	0.145	0.4468	0.0026	0.0022				0.0124							0.0124	0.3001	0	0	0	1.1532	0	0	0				12	CM	4	0	2	2
663	Female	4	6.59	8.7	7.1	0.32	0.16	1.3	2.05	1.15	5.2	3.85	0.262	0.2066	0.3755	0.003	0.0002			0.215								0.215	0.047	0	0	16.985	0	0	0	0				12	CM	4	0	2	2
664	Male	4	7.45	9	7.5	0.4	0.2	1.45	2.1	1.25	6.65	3.35	0.2305	0.092	0.012	0.0027	0.0025	0.0014										0.0014	0.2291	0.1834	0	0	0	0	0	0				12	CM	4	1	2	2
665	Male	3	6.15	8.5	7	0.37	0.21	1.25	1.95	1.15	5.39	5.65	0.291	0.0888	0.0183	0.0032	0.0033	0.0089						0.1132			0.1132	0.1221	0.1689	1.1659	0	0	0	0	0	64.524				12	CM	4	1	2	1
666	Male	4	6.18	8.6	7.1	0.37	0.23	1.05	1.9	1.25	5.38	7.15	0.4779	0.1268	0.038	0.0016	0.0015											0	0.4779	0	0	0	0	0	0	0				12	CM	4	1	2	1
667	Female	3	6.62	8.7	7.3	0.37	0.21	1.2	2.05	1.25	5.5	5.25	0.3149	0.1023	0.0998	0.0018	0.002	0.0254										0.0254	0.2895	3.3274	0	0	0	0	0	0				12	CM	4	0	2	2
668	Female	4	6.21	8.7	7.4	0.34	0.24	1.15	1.9	1.1	5.16	3.65	0.2736	0.0754	0.2339	0.0023	0.0002						0.0102					0.0102	0.2634	0	0	0	0	0	1.6014	0				12	CM	4	0	2	2
669	Male	2	6.39	8.5	6.9	0.37	0.22	1.25	2.05	0.1	5.52	4.65	0.3782	0.1328	0.0114	0.0026	0.0028											0	0.3782	0	0	0	0	0	0	0				12	CM	4	1	2	1
670	Male	2	7.12	9.3	7.5	0.43	0.22	1.15	1.95	1.15	6.25	3.65	0.244	0.0941	0.0071	0.0026	0.0026											0	0.244	0	0	0	0	0	0	0				12	CM	4	1	2	2
671	Male	3	5.19	7.9	6.6	0.39	0.2	1.05	1.85	1.15	4.56	5.45	0.3077	0.075	0.0189	0.0027	0.00047											0	0.3077	0	0	0	0	0	0	0				12	CM	4	1	2	1
672	Male	2	4.94	7.9	6.6	0.44	0.27	1.1	1.85	1	4.24	4.85	0.3152	0.1064	0.0055	0.0023	0.002	0.0125										0.0125	0.3027	1.6375	0	0	0	0	0	0				12	CM	4	1	2	1
673	Female	5	8.4	6.8	5.5	0.22	0.097	2.05	1.05	0.1	5.26	2.95	0.146	0.0922	0.3575	0.0017	0.002											0	0.146	0	0	0	0	0	0	0				12	CM	4	0	2	2
674	Male	3	4.34	7.7	6.4	0.37	0.17	1.05	1.7	1	3.83	4.85	0.4869	0.0851	0.0137	0.0016	0.0017			0.0145								0.0145	0.4724	0	0	1.1455	0	0	0	0				12	CM	4	1	2	1
675	Male	2	10.27	10	8.1	0.5	0.13	1.3	2.25	1.05	8.08	4.7	0.4145	0.1627	0.0154	0.0039	0.0046						0.0103	0.1089	0.0496		0.0593	0.1192	0.2953	0	0	0	0	0	1.6171	62.073				1	CM	4	1	1	2
676	Female	4	9.17	9.5	7.5	0.35	0.19	1.35	2.05	1	7.12	3.2	0.2722	0.1284	0.4306	0.0034	0.0025				0.0431							0.0431	0.2291	0	0	0	4.0083	0	0	0				1	CM	4	0	1	2
677	Male	2	9.13	9.7	7.7	0.46	0.31	1.15	1.85	1.1	7.5	4.3	0.3645	0.1237	0.0163	0.0044	0.0042				0.0648		0.0194					0.0842	0.2803	0	0	0	6.0264	0	3.0458	0				1	CM	4	1	1	2
678	Female	4	14.03	10.5	8.6	0.45	0.31	1.7	2.35	1.1	10.5	8.2	0.8796	0.3419	0.3581	0.0044	0.0043				0.3739							0.3739	0.5057	0	0	0	34.7727	0	0	0				1	CM	4	0	1	2
679	Female	4	8.63	9.3	7.5	0.44	0.27	1.25	2	0.95	6.44	5.4	0.3434	0.1529	0.4131	0.0032	0.0029				0.1194							0.1194	0.224	0	0	0	11.1042	0	0	0				1	CM	4	0	1	2
680	Female	3	11.19	10	8.2	0.42	0.22	1.35	2.3	1.05	9.04	5.8	0.3448	0.1291	0.1531	0.0049	0.0042											0	0.3448	0	0	0	0	0	0	0				1	CM	4	0	1	2
681	Male	2	8.86	9.4	7.6	0.45	0.24	1.15	1.95	1.05	7.22	4.3	0.3165	0.1671	0.0349	0.0031	0.0036			0.0632								0.0632	0.2533	0	0	4.9928	0	0	0	0				1	CM	4	1	1	2
682	Male	3	7.79	9.4	7.4	0.4	0.18	0.95	2.05	0.95	6.28	4.8	0.3012	0.1447	0.0083	0.003	0.0031				0.0485							0.0485	0.2527	0	0	0	4.5105	0	0	0				1	CM	4	1	1	2
683	Male	2	6.36	8.5	6.7	0.45	0.25	1	1.85	1.1	4.96	4.5	0.2371	0.0742	0.0208	0.0024	0.0021				0.0155							0.0155	0.2216	0	0	0	1.4415	0	0	0				1	CM	4	1	1	1
684	Female	1	4.68	7	6.3	0.36	0.2	1.15	1.65	0.9	3.58	4.3	0.2103	0.0817	0.0431	0.0024	0.0019			0.0319			0.0111					0.043	0.1673	0	0	2.5201	0	0	1.7427	0				1	CM	4	0	1	2
685	Male	2	3.27	5	6.2	0.35	0.18	0.85	1.2	0.85	2.41	3.7	0.1831	0.0539	0.0053	0.0015	0.0011							0.0772			0.0772	0.0772	0.1059	0	0	0	0	0	0	44.004				1	CM	4	1	1	1
686	Male	2	1.84	6.3	4.8	0.29	0.19	0.7	1.35	0.8	1.27	2.3	0.1198	0.0151	0.0102	0.0012	0.0014			0.0077				0.0368			0.0368	0.0445	0.0753	0	0	0.6083	0	0	0	20.976				1	CM	4	1	1	1
687	Male	1	2.01	6.5	5.1	0.33	0.16	0.65	1.4	0.9	1.92	3.5	0.1432	0.0352	0.0063	0.0017	0.0011							0.012			0.012	0.012	0.1312	0	0	0	0	0	0	6.84				1	CM	4	1	1	1
688	Male	1	1.56	5.84	4.8	0.29	0.12	0.7	1.3	0.65	1.04	2.4	0.0683	0.0245	0.0032	0.001	0.001											0	0.0683	0	0	0	0	0	0	0				1	CM	4	1	1	1
689	Male	1	1.29	5.4	4.1	0.23	0.06	0.5	1.1	0.75	0.88	2.8	0.0562	0.0322	0.0086	0.0008	0.0008						0.0029					0.0029	0.0533	0	0	0	0	0	0.4553	0				1	CM	4	1	1	1
690	Female	3	2.52	6.5	5	0.23	0.07	0.75	1.35	0.85	1.76	2.6	0.1132	0.0474	0.1918	0.0006	0.0012				0.0191							0.0191	0.0941	0	0	0	1.7763	0	0	0				1	CM	4	0	1	1
691	Male	1	1.32	5.7	4.3	0.22	0.12	0.55	1.2	0.65	0.87	3.2	0.0724	0.0146	0.0116	0.0005	0.0009			0.0042				0.0213			0.0213	0.0255	0.0469	0	0	0.3318	0	0	0	12.141				1	CM	4	1	1	1
692	Male	3	9.37	9.7	7.6	0.38	0.2	1.45	2.2	1.05	7.32	3.4	0.2836	0.1398	0.432	0.0038	0.0029											0	0.2836	0	0	0	0	0	0	0				2	CM	4	1	1	2
693	Female	5	9.33	9.9	7.8	0.49	0.32	1.25	2	1.15	7.7	4.5	0.3749	0.1341	0.0177	0.0048	0.0046						0.0145					0.0145	0.3604	0	0	0	0	0	2.2765	0				2	CM	4	0	1	2
694	Female	4	14.13	10.6	8.8	0.47	0.33	1.9	2.45	1.2	10.65	8.35	0.8922	0.3544	0.3613	0.0046	0.0045											0	0.8922	0	0	0	0	0	0	0				2	CM	4	0	1	2
695	Female	3	8.73	9.4	7.7	0.46	0.29	1.45	2.1	1.05	6.59	5.55	0.356	0.1654	0.4163	0.0034	0.0031											0	0.356	0	0	0	0	0	0	0				2	CM	4	0	1	2
696	Male	2	11.29	10.1	8.4	0.44	0.24	1.55	2.4	1.15	9.19	5.95	0.3574	0.1416	0.1563	0.0051	0.0044							0.0125			0.0125	0.0125	0.3449	0	0	0	0	0	0	7.125				2	CM	4	1	1	2
697	Male	4	8.96	9.5	7.8	0.47	0.26	1.35	2.05	1.15	7.37	4.45	0.3291	0.1796	0.0381	0.0033	0.0038							0.0012			0.0012	0.0012	0.3279	0	0	0	0	0	0	0.684				2	CM	4	1	1	2
698	Male	2	7.89	9.5	7.6	0.42	0.2	1.15	2.15	1.05	6.43	4.95	0.3138	0.1572	0.0115	0.0032	0.0033			0.0125								0.0125	0.3013	0	0	0.9875	0	0	0	0				2	CM	4	1	1	2
699	Female	1	6.56	8.7	6.8	0.48	0.26	1.1	2	1.15	5.16	4.7	0.2485	0.0856	0.0222	0.0028	0.0025					0.0077		0.0025			0.0025	0.0102	0.2383	0	0	0	0	0.2926	0	1.425				2	CM	4	0	1	2
700	Male	3	4.88	7.2	6.4	0.39	0.21	1.25	1.8	0.95	3.78	4.5	0.2217	0.0931	0.0445	0.0028	0.0023							0.00141			0.00141	0.00141	0.22029	0	0	0	0	0	0	0.8037				2	CM	4	1	1	1
701	Male	2	3.47	5.2	6.3	0.38	0.19	0.95	1.35	0.9	2.61	3.9	0.1945	0.0653	0.0167	0.0019	0.0015						0.0078	0.0121			0.0121	0.0199	0.1746	0	0	0	0	0	1.2246	6.897				2	CM	4	1	1	1
702	Male	1	2.04	6.5	4.9	0.32	0.2	0.8	1.5	0.85	1.47	2.5	0.1312	0.0265	0.0116	0.0016	0.0018											0	0.1312	0	0	0	0	0	0	0				2	CM	4	1	1	1
703	Male	2	2.21	6.7	5.2	0.36	0.17	0.75	1.55	0.95	2.12	3.7	0.1546	0.0466	0.0077	0.0021	0.0015			0.0155			0.0011					0.0166	0.138	0	0	1.2245	0	0	0.1727	0				2	CM	4	1	1	1
704	Male	1	1.76	6.04	4.9	0.32	0.13	0.8	1.45	0.7	1.24	2.6	0.0797	0.0359	0.0046	0.0014	0.0014											0	0.0797	0	0	0	0	0	0	0				2	CM	4	1	1	1
705	Female	4	1.49	5.6	4.2	0.26	0.07	0.6	1.25	0.8	1.08	3	0.0676	0.0436	0.2978	0.0012	0.0012											0	0.0676	0	0	0	0	0	0	0				2	CM	4	0	1	1
706	Male	2	2.72	6.7	5.1	0.26	0.08	0.85	1.5	0.9	1.96	2.8	0.1246	0.0588	0.0014	0.001	0.0016			0.0478								0.0478	0.0768	0	0	3.7762	0	0	0	0				2	CM	4	1	1	1
707	Male	3	1.52	5.9	4.4	0.25	0.13	0.65	1.35	0.7	1.07	3.4	0.0838	0.026	0.013	0.0009	0.0013											0	0.0838	0	0	0	0	0	0	0				2	CM	4	1	1	1
708	Female	1	2.01	6.3	4.83	0.37	0.2	0.8	1.35	1.2	1.67	3.5	0.1293	0.0252	0.0068	0.002	0.0019							0.0125			0.0125	0.0125	0.1168	0	0	0	0	0	0	7.125				4	ST	2	0	1	1
709	Female	1	3.85	7.6	6.03	0.4	0.15	0.9	1.65	1.4	3.19	3.3	0.1809	0.0428	0.0171	0.0018	0.0023						0.0023	0.0215			0.0215	0.0238	0.1571	0	0	0	0	0	0.3611	12.255				4	ST	2	0	1	2
710	Female	2	3.3	7.4	5.62	0.37	0.3	0.8	1.25	1.4	2.86	3.45	0.1467	0.0236	0.0156	0.0012	0.0017	0.0016			0.01263							0.01423	0.13247	0.2096	0	0	1.17459	0	0	0				4	ST	2	0	1	2
711	Female	4	6.35	9.1	6.92	0.4	0.3	1.05	1.05	1.55	5.07	3.75	0.1495	0.0531	0.2534	0.0025	0.0027		0.0025									0.0025	0.147	0	0.05	0	0	0	0	0				4	ST	2	0	1	2
712	Female	2	4.51	8.2	6.22	0.41	0.28	0.95	1.8	1.55	3.78	3.75	0.1903	0.037	0.021	0.0023	0.0023											0	0.1903	0	0	0	0	0	0	0				4	ST	2	0	1	2
713	Female	1	3.78	7.5	5.72	0.34	0.31	0.75	1.65	1.4	3	3.55	0.1622	0.0463	0.0177	0.0021	0.0022							0.0772			0.0772	0.0772	0.085	0	0	0	0	0	0	44.004				4	ST	2	0	1	2
714	Female	1	2.9	7.2	5.52	0.36	0.29	0.75	1.55	1.35	2.39	3.35	0.1274	0.0291	0.015	0.002	0.0018	0.0078						0.0368			0.0368	0.0446	0.0828	1.0218	0	0	0	0	0	20.976				4	ST	2	0	1	2
715	Female	2	2.94	7.1	5.53	0.36	0.21	0.95	1.5	1.3	2.44	3.7	0.2404	0.0335	0.0178	0.0018	0.0017			0.0632								0.0632	0.1772	0	0	4.9928	0	0	0	0				4	ST	2	0	1	2
716	Male	1	2.42	6.4	5.13	0.29	0.19	0.75	1.45	1.25	1.99	2.7	0.1366	0.0247	0.0021	0.0017	0.0018				0.0485							0.0485	0.0881	0	0	0	4.5105	0	0	0				4	ST	2	1	1	1
717	Female	1	3.07	7.3	5.53	0.36	0.22	0.8	1.45	1.4	2.62	2.5	0.1132	0.0422	0.0105	0.0014	0.0021				0.0155							0.0155	0.0977	0	0	0	1.4415	0	0	0				4	ST	2	0	1	2
718	Male	2	3.48	7.3	5.73	0.39	0.23	0.95	1.5	1.4	2.86	3.1	0.2168	0.0327	0.0026	0.0022	0.002			0.0319			0.0111					0.043	0.1738	0	0	2.5201	0	0	1.7427	0				4	ST	2	1	1	2
719	Female	1	2.29	6.4	4.93	0.35	0.19	0.95	0.4	1.3	1.91	3	0.1324	0.0269	0.0068	0.0015	0.0019											0	0.1324	0	0	0	0	0	0	0				4	ST	2	0	1	2
720	Male	2	2.75	6.6	5.03	0.33	0.19	0.85	1.45	1.4	2.35	2.5	0.1481	0.0419	0.0042	0.0018	0.0017			0.0077								0.0077	0.1404	0	0	0.6083	0	0	0	0				4	ST	2	1	1	2
721	Female	2	1.75	5.9	4.73	0.32	0.17	0.2	1.3	0.75	1.53	3.7	0.1079	0.0188	0.0017	0.0012	0.0016							0.012			0.012	0.012	0.0959	0	0	0	0	0	0	6.84				4	ST	2	0	1	1
722	Female	1	1.42	7	5.43	0.33	0.22	0.85	1.55	1.3	2.41	2.7	0.1417	0.0274	0.0047	0.0014	0.0016											0	0.1417	0	0	0	0	0	0	0				4	ST	2	0	1	2
723	Male	1	2.6	6.5	5.03	0.31	0.21	0.8	1.4	1.3	1.88	3	0.1475	0.0464	0.0082	0.0023	0.0018						0.0029					0.0029	0.1446	0	0	0	0	0	0.4553	0				4	ST	2	1	1	1
724	Male	1	1.46	6.3	4.83	0.31	0.21	0.8	1.6	1.25	1.75	2.6	0.1133	0.0362	0.0021	0.0014	0.0018				0.0191							0.0191	0.0942	0	0	0	1.7763	0	0	0				4	ST	2	1	1	1
725	Female	2	1.65	6.1	4.63	0.31	0.2	0.8	1.35	1.15	1.59	3.1	0.1213	0.0272	0.0058	0.0016	0.0014			0.0042				0.0213			0.0213	0.0255	0.0958	0	0	0.3318	0	0	0	12.141				4	ST	2	0	1	1
726	Male	1	1.72	6.3	5.03	0.29	0.22	0.8	1.4	1.3	1.76	2.3	0.1144	0.0304	0.0092	0.0016	0.0017											0	0.1144	0	0	0	0	0	0	0				4	ST	2	1	1	1
727	Female	1	1.38	6.4	4.93	0.36	0.23	0.9	1.3	1.3	1.82	2.8	0.1271	0.0277	0.0108	0.0013	0.0014						0.0145					0.0145	0.1126	0	0	0	0	0	2.2765	0				4	ST	2	0	1	2
728	Female	1	1.53	6.6	5.13	0.33	0.23	0.8	1.5	1.3	2.02	2.8	0.1258	0.0331	0.0044	0.0015	0.0017											0	0.1258	0	0	0	0	0	0	0				5	ST	2	0	1	2
729	Female	1	1.38	6	4.73	0.34	0.22	0.65	1.3	1.25	1.59	3	0.106	0.0189	0.007	0.0016	0.0015											0	0.106	0	0	0	0	0	0	0				5	ST	2	0	1	1
730	Female	1	1.37	6.4	5.03	0.3	0.18	0.8	1.35	1.25	1.67	2.7	0.1461	0.031	0.0085	0.0016	0.0014							0.0125			0.0125	0.0125	0.1336	0	0	0	0	0	0	7.125				5	ST	2	0	1	2
731	Female	2	1.71	6.5	5.03	0.34	0.21	0.9	1.45	1.25	1.97	3.2	0.1652	0.0429	0.0091	0.0018	0.0016							0.0012			0.0012	0.0012	0.164	0	0	0	0	0	0	0.684				5	ST	2	0	1	2
732	Female	1	1.89	6.2	4.73	0.31	0.22	0.7	1.25	1.15	1.57	2.8	0.1041	0.0223	0.0073	0.0017	0.0014			0.0125								0.0125	0.0916	0	0	0.9875	0	0	0	0				5	ST	2	0	1	1
733	Male	2	2.82	5.9	4.43	0.32	0.17	0.75	1.3	1.2	1.44	2.8	0.1064	0.0275	0.0084	0.0018	0.0014					0.0077		0.0025			0.0025	0.0102	0.0962	0	0	0	0	0.2926	0	1.425				5	ST	2	1	1	1
734	Female	2	2.38	5.6	4.43	0.31	0.21	0.7	1.2	1.15	1.16	2.3	0.0762	0.0181	0.0033	0.0015	0.0012	0.0025						0.00141			0.00141	0.00391	0.07229	0.3275	0	0	0	0	0	0.8037				5	ST	2	0	1	1
735	Female	1	2.11	6.8	5.33	0.37	0.19	0.8	1.35	1.35	2.13	2.4	0.1282	0.0302	0.0039	0.0017	0.0013							0.0121		0.0121		0.0121	0.1161	0	0	0	0	0	0	6.897				5	ST	2	0	1	2
736	Male	1	1.92	5.6	4.23	0.31	0.18	0.7	1.1	1.1	1.24	2	0.085	0.0187	0.009	0.0011	0.0014											0	0.085	0	0	0	0	0	0	0				5	ST	2	1	1	1
737	Male	2	2.16	5.6	4.33	0.29	0.2	0.7	1.1	1.15	1.39	1.8	0.0954	0.0305	0.0032	0.0012	0.0013						0.001					0.001	0.0944	0	0	0	0	0	0.157	0				5	ST	2	1	1	1
738	Female	1	2.31	5.8	4.53	0.31	0.18	0.75	1.2	1.15	1.51	2	0.0888	0.0252	0.0156	0.0013	0.0014							0.0402			0.0402	0.0402	0.0486	0	0	0	0	0	0	22.914				5	ST	2	0	1	1
739	Male	1	2.38	5.8	4.52	0.31	0.29	0.6	1.3	1.05	1.16	1.95	0.1888	0.0236	0.0093	0.0012	0.0014						0.0169	0.0415	0.0169		0.0246	0.0584	0.1473	0	0	0	0	0	2.6533	23.655				5	ST	2	1	1	1
740	Male	1	1.92	5.9	4.42	0.3	0.29	0.75	1.25	1.1	1.27	2.05	0.0748	0.0167	0.0083	0.001	0.0014											0	0.0748	0	0	0	0	0	0	0				5	ST	2	1	1	1
741	Male	1	2.02	5.8	4.42	0.3	0.31	0.7	1.35	1.15	1.17	2.25	0.1126	0.0205	0.0068	0.0011	0.0013						0.0018	0.0627			0.0627	0.0645	0.0481	0	0	0	0	0	0.2826	35.739				5	ST	2	1	1	1
742	Female	1	2.47	5.7	4.32	0.32	0.29	0.65	1.3	1.15	1.13	2	0.0762	0.0173	0.0103	0.0009	0.0014				0.0113		0.0009	0.0224		0.0224		0.0346	0.0416	0	0	0	1.0509	0	0.1413	12.768				5	ST	2	0	1	1
743	Male	1	1.9	6	4.52	0.27	0.25	0.6	1.4	1.2	1.44	2.15	0.0625	0.0216	0.0067	0.0011	0.0011											0	0.0625	0	0	0	0	0	0	0				5	ST	2	1	1	1
744	Male	1	1.27	5.6	4.12	0.33	0.27	0.15	1.2	1	1.19	2.45	0.069	0.0214	0.0042	0.0014	0.0011			0.0125								0.0125	0.0565	0	0	0.9875	0	0	0	0				5	ST	2	1	1	1
745	Male	2	1.41	5.7	4.42	0.32	0.25	0.7	1.35	1.05	1.08	1.95	0.0871	0.028	0.0071	0.0008	0.0007			0.0122								0.0122	0.0749	0	0	0.9638	0	0	0	0				5	ST	2	1	1	1
746	Male	1	1.25	5.7	4.22	0.32	0.25	0.6	1.15	1	1.06	2.45	0.0565	0.0221	0.0038	0.0012	0.0014			0.0086			0.002	0.0254			0.0254	0.036	0.0205	0	0	0.6794	0	0	0.314	14.478				5	ST	2	1	1	1
747	Male	1	1.09	5.3	4.02	0.27	0.208	0.6	1.15	1.05	0.94	1.85	0.0909	0.0205	0.0034	0.0009	0.0011							0.006			0.006	0.006	0.0849	0	0	0	0	0	0	3.42				5	ST	2	1	1	1
748	Female	2	1.13	5.4	4.32	0.37	0.28	0.55	1.25	1.1	0.95	2.75	0.0646	0.0222	0.0091	0.0009	0.0013	0.0019						0.0235			0.0235	0.0254	0.0392	0.2489	0	0	0	0	0	13.395				5	ST	2	0	1	1
749	Female	1	0.92	5.1	3.82	0.25	0.27	0.6	1.15	0.95	0.77	1.85	0.1098	0.0158	0.0089	0.0006	0.0009	0.0238						0.0131			0.0131	0.0369	0.0729	3.1178	0	0	0	0	0	7.467				5	ST	2	0	1	1
750	Male	1	1.24	5.6	4.22	0.3	0.29	0.65	1.35	1.1	1.03	2.65	0.0821	0.0265	0.0075	0.0011	0.0009						0.0361	0.0582	0.0361		0.0221	0.0943	0.0239	0	0	0	0	0	5.6677	33.174				5	ST	2	1	1	1
751	Female	1	1.41	5.8	4.22	0.33	0.32	0.6	1.35	1.2	1.09	2.95	0.0692	0.0268	0.0106	0.0008	0.0013							0.0162		0.0162		0.0162	0.053	0	0	0	0	0	0	9.234				5	ST	2	0	1	1
752	Female	2	4.78	8.1	6.5	0.4	0.2	1.1	1.7	0.8	4.07	3.8	0.2069	0.0231	0.0275	0.0027	0.0026			0.0496								0.0496	0.1573	0	0	3.9184	0	0	0	0				6	ST	2	0	2	2
753	Female	4	6.39	8.5	6.8	0.5	0.25	1.3	2	0.8	5.2	5.2	0.2725	0.0741	0.2644	0.001	0.0011	0.1073										0.1073	0.1652	14.0563	0	0	0	0	0	0				6	ST	2	0	2	2
754	Female	3	4.98	8.3	6.5	0.4	0.2	1.1	1.75	0.85	4.2	4.4	0.1605	0.0274	0.0693	0.0029	0.0026						0.0277	0.0704			0.0704	0.0981	0.0624	0	0	0	0	0	4.3489	40.128				6	ST	2	0	2	2
755	Female	4	5.91	8.8	7	0.5	0.2	1.3	1.8	0.9	4.98	4.5	0.2663	0.0352	0.1523	0.0026	0.0028				0.0563			0.0313			0.0313	0.0876	0.1787	0	0	0	5.2359	0	0	17.841				6	ST	2	0	2	2
756	Female	4	4.4	8	6.3	0.45	0.2	1.1	1.75	0.75	3.59	4.3	0.1055	0.0221	0.2766	0.0029	0.0031			0.0337								0.0337	0.0718	0	0	2.6623	0	0	0	0				6	ST	2	0	2	2
757	Female	4	3.79	7.5	6	0.45	0.2	1	1.75	0.8	3.19	3.9	0.0909	0.0285	0.0936	0.0022	0.0024							0.0277			0.0277	0.0277	0.0632	0	0	0	0	0	0	15.789				6	ST	2	0	2	2
758	Female	4	4.6	7.7	6.2	0.45	0.2	1.1	1.7	0.8	3.8	4.6	0.1994	0.0174	0.0686	0.0023	0.0026		0.0154					0.0201			0.0201	0.0355	0.1639	0	0.308	0	0	0	0	11.457				6	ST	2	0	2	2
759	Female	4	4.57	7.8	6.2	0.45	0.2	1.15	1.6	0.9	3.74	4	0.2314	0.0284	0.0787	0.0023	0.0023	0.0837										0.0837	0.1477	10.9647	0	0	0	0	0	0				6	ST	2	0	2	2
760	Female	3	4.55	8	6.4	0.45	0.2	1	1.6	0.8	3.9	5.8	0.2235	0.0278	0.0507	0.0026	0.0026			0.1518								0.1518	0.0717	0	0	11.9922	0	0	0	0				6	ST	2	0	2	2
761	Female	4	6.09	8.8	6.8	0.4	0.2	1.1	1.8	0.9	5.23	5.2	0.1933	0.0571	0.1202	0.0031	0.0031											0	0.1933	0	0	0	0	0	0	0				6	ST	2	0	2	2
762	Female	4	5.86	8.4	6.6	0.4	0.2	1.15	1.8	0.85	4.7	5	0.3006	0.0609	0.302	0.0028	0.0026	0.0714										0.0714	0.2292	9.3534	0	0	0	0	0	0				6	ST	2	0	2	2
763	Female	3	5.11	8.4	6.5	0.45	0.2	1.15	1.8	0.85	4.47	5.4	0.247	0.0677	0.0581	0.0028	0.0025	0.0148										0.0148	0.2322	1.9388	0	0	0	0	0	0				6	ST	2	0	2	2
764	Female	2	5.12	8.5	6.7	0.5	0.25	1.1	1.9	0.9	4.52	4.9	0.1843	0.068	0.0088	0.0026	0.003							0.0508			0.0508	0.0508	0.1335	0	0	0	0	0	0	28.956				6	ST	2	0	2	2
765	Female	4	3.78	7.5	5.9	0.4	0.15	0.95	1.5	0.7	3.09	4.6	0.2735	0.0637	0.1377	0.0021	0.0019			0.0201				0.024			0.024	0.0441	0.2294	0	0	1.5879	0	0	0	13.68				6	ST	2	0	2	2
766	Female	3	4.67	8.2	6.3	0.45	0.2	1.1	1.9	0.85	3.99	4.4	0.2498	0.0554	0.044	0.0024	0.0024		0.0315					0.0217			0.0217	0.0532	0.1966	0	0.63	0	0	0	0	12.369				6	ST	2	0	2	2
767	Female	4	5.04	8.4	6.6	0.45	0.2	1.15	1.8	0.85	4.18	4	0.103	0.0339	0.3901	0.0028	0.003							0.0148			0.0148	0.0148	0.0882	0	0	0	0	0	0	8.436				6	ST	2	0	2	2
768	Female	5	4.62	7.9	6.2	0.45	0.2	1.1	1.7	0.8	3.82	5	0.1585	0.0688	0.4546	0.0024	0.002						0.0159					0.0159	0.1426	0	0	0	0	0	2.4963	0				6	ST	2	0	2	2
769	Female	2	5.41	8.5	6.9	0.45	0.2	1.1	1.8	0.9	4.55	3.8	0.3069	0.0643	0.0516	0.0023	0.0024			0.1535				0.0249		0.0249		0.1784	0.1285	0	0	12.1265	0	0	0	14.193				6	ST	2	0	2	2
770	Female	4	5.13	8.6	6.8	0.45	0.2	1.05	1.7	0.85	4.3	4.2	0.2194	0.0615	0.2266	0.0033	0.003		0.0336									0.0336	0.1858	0	0.672	0	0	0	0	0				6	ST	2	0	2	2
771	Female	1	4.24	7.8	6.4	0.4	0.15	1	1.6	0.75	3.68	3.8	0.1441	0.0856	0.0226	0.0023	0.0019							0.0018			0.0018	0.0018	0.1423	0	0	0	0	0	0	1.026				6	ST	2	0	2	2
772	Male	2	3.3	7.2	5.6	0.45	0.15	1	1.6	0.75	2.88	4.4	0.1465	0.032	0.0153	0.0027	0.0025											0	0.1465	0	0	0	0	0	0	0				6	ST	2	1	2	2
773	Female	5	4.75	8.4	6.6	0.45	0.25	1.1	1.85	0.85	3.9	2.9	0.181	0.0349	0.4317	0.0025	0.0024											0	0.181	0	0	0	0	0	0	0				6	ST	2	0	2	2
774	Male	2	2.48	6.6	5.3	0.3	0.1	0.9	1.4	0.6	2.13	3.8	0.0959	0.0495	0.0273	0.0032	0.0029						0.0042					0.0042	0.0917	0	0	0	0	0	0.6594	0				6	ST	2	1	2	2
775	Female	4	6.02	8.4	6.6	0.5	0.2	1.1	1.9	0.9	5.06	4.8	0.2869	0.0743	0.2171	0.0031	0.0029						0.094					0.094	0.1929	0	0	0	0	0	14.758	0				6	ST	2	0	2	2
776	Female	4	4.06	7.8	6.1	0.45	0.2	1	1.8	0.75	3.46	3.9	0.1627	0.03445	0.1677	0.0023	0.0022							0.0401		0.0248	0.0153	0.0401	0.1226	0	0	0	0	0	0	22.857				6	ST	2	0	2	2
777	Male	1	2.63	6.7	5.3	0.45	0.15	0.9	1.45	0.7	2.26	3.5	0.1533	0.011	0.0055	0.0016	0.0018			0.0186	0.0497			0.0032			0.0032	0.0715	0.0818	0	0	1.4694	4.6221	0	0	1.824				6	ST	2	1	2	2
778	Male	1	1.91	6	4.9	0.3	0.1	0.8	1.35	0.6	1.67	2.9	0.0818	0.0083	0.0023	0.0009	0.0011			0.0325								0.0325	0.0493	0	0	2.5675	0	0	0	0				6	ST	2	1	2	1
779	Female	1	1.81	6	4.8	0.3	0.1	0.75	1.25	0.6	1.54	3	0.0618	0.0081	0.0114018	0.0015	0.0013							0.0245			0.0245	0.0245	0.0373	0	0	0	0	0	0	13.965				6	ST	2	0	2	1
780	Male	2	3.77	7.2	5.7	0.35	0.1	1	1.6	0.75	3.19	3.4	0.1704	0.0269	0.0185	0.0021	0.002							0.0362			0.0362	0.0362	0.1342	0	0	0	0	0	0	20.634				6	ST	2	1	2	2
781	Female	4	6.46	8.7	6.9	0.45	0.2	1.2	1.9	1	5.27	5.2	0.2568	0.0708	0.1721	0.0027	0.003							0.0611			0.0611	0.0611	0.1957	0	0	0	0	0	0	34.827				6	ST	2	0	2	2
782	Female	3	2.79	7.8	5.5	0.4	0.2	0.9	1.45	0.75	2.35	3.7	0.1688	0.0288	0.034	0.0018	0.0015											0	0.1688	0	0	0	0	0	0	0				6	ST	2	0	2	2
783	Female	3	4.55	8	5.4	0.4	0.2	1.1	1.9	0.9	3.8	5.8	0.3066	0.0445	0.0358	0.0029	0.0026				0.0981			0.0826		0.0295	0.0531	0.1807	0.1259	0	0	0	9.1233	0	0	47.082				6	ST	2	0	2	2
784	Female	4	4.12	7.9	5.2	0.4	0.2	1.1	1.7	0.75	3.48	4.3	0.1926	0.0492	0.1862	0.0016	0.002				0.0432							0.0432	0.1494	0	0	0	4.0176	0	0	0				6	ST	2	0	2	2
785	Female	4	4.85	8.1	6.8	0.3	0.15	0.95	1.8	1.1	3.54	3.9	0.087	0.033	0.2668	0.0018	0.0016											0	0.087	0	0	0	0	0	0	0				7	ST	2	0	2	2
786	Male	4	6.09	8.9	7.3	0.32	0.25	1.05	2	0.95	5.16	3.7	0.1475	0.0698	0.0216	0.0021	0.0024						0.0128	0.0128	0.0128			0.0256	0.1347	0	0	0	0	0	2.0096	7.296				7	ST	2	1	2	2
787	Female	4	6.03	8.7	6.8	0.34	0.21	1.05	1.95	1.05	4.42	4.9	0.2039	0.0163	0.2914	0.0023	0.0025						0.0135	0.0135	0.0135			0.027	0.1904	0	0	0	0	0	2.1195	7.695				7	ST	2	0	2	2
788	Female	4	8.26	8.7	6.7	0.38	0.16	1.05	1.86	1.15	4.87	5.2	0.2762	0.1315	0.2278	0.0028	0.0027				0.109							0.109	0.1672	0	0	0	10.137	0	0	0				7	ST	2	0	2	2
789	Male	4	5.36	8.6	7.5	0.35	0.15	1.05	1.8	0.95	4.02	4.2	0.315	0.1552	0.0504	0.0029	0.0028				0.0187							0.0187	0.2963	0	0	0	1.7391	0	0	0				7	ST	2	1	2	2
790	Female	5	5.24	8.1	6.9	0.39	0.21	1	1.55	1	3.98	3.6	0.1871	0.1884	0.3664	0.0021	0.0023			0.0167								0.0167	0.1704	0	0	1.3193	0	0	0	0				7	ST	2	0	2	2
791	Male	4	6.03	8.4	6.7	0.35	0.2	1.1	1.65	1.05	4.57	4.1	0.2682	0.0969	0.037	0.0023	0.0025		0.0223		0.0482							0.0705	0.1977	0	0.446	0	4.4826	0	0	0				7	ST	2	1	2	2
792	Male	3	3.43	7.4	5.8	0.31	0.15	0.8	1.55	0.95	2.58	3.7	0.1742	0.0972	0.012	0.0021	0.0024			0.0378								0.0378	0.1364	0	0	2.9862	0	0	0	0				7	ST	2	1	2	2
793	Male	3	6.2	8.8	7.1	0.35	0.2	1.05	1.9	0.95	5.08	2.6	0.1697	0.0304	0.0133	0.0032	0.0036											0	0.1697	0	0	0	0	0	0	0				7	ST	2	1	2	2
794	Male	2	3.22	8.2	6.9	0.34	0.13	0.8	1.65	1.1	2.52	2.4	0.0889	0.065	0.0059	0.0037	0.0035			0.0101								0.0101	0.0788	0	0	0.7979	0	0	0	0				7	ST	2	1	2	2
795	Male	3	4.18	8.9	7.6	0.23	0.18	1	2	1.25	5.34	3.9	0.2132	0.0307	0.0187	0.0039	0.0043	0.0218										0.0218	0.1914	2.8558	0	0	0	0	0	0				7	ST	2	1	2	2
796	Female	4	6.16	9	7.3	0.38	0.19	1	1.85	1.05	5.12	2.1	0.1205	0.0828	0.2607	0.0036	0.0032											0	0.1205	0	0	0	0	0	0	0				7	ST	2	0	2	2
797	Male	1	3.83	7.5	6.2	0.39	0.22	0.9	1.62	1	3.3	4.6	0.1699	0.0493	0.0065	0.0028	0.0026						0.0205	0.0205	0.0205			0.041	0.1494	0	0	0	0	0	3.2185	11.685				7	ST	2	1	2	2
798	Female	2	4.64	8.4	6.1	0.4	0.13	0.85	1.65	1.05	3.87	4.7	0.1188	0.0312	0.0465	0.0025	0.0027						0.013	0.013	0.013			0.026	0.1058	0	0	0	0	0	2.041	7.41				7	ST	2	0	2	2
799	Male	4	4.13	8.1	6.7	0.4	0.2	0.85	1.7	1.1	3.27	5.6	0.1529	0.0434	0.0214	0.0019	0.0017			0.0169								0.0169	0.136	0	0	1.3351	0	0	0	0				7	ST	2	1	2	2
800	Male	3	3.6	7.1	6.1	0.3	0.09	0.85	1.55	1.05	2.63	3.2	0.4116	0.0505	0.0133	0.0024	0.0021					0.2124						0.2124	0.1992	0	0	0	0	8.0712	0	0				7	ST	2	1	2	2
801	Female	3	3.98	7.5	5.6	0.34	0.18	0.85	1.55	1.05	3.01	5.7	0.1813	0.0277	0.2364	0.0025	0.0026			0.0332								0.0332	0.1481	0	0	2.6228	0	0	0	0				7	ST	2	0	2	2
802	Male	4	5.03	7.9	6.1	0.32	0.15	0.95	1.65	1.15	3.85	3.7	0.0957	0.0266	0.0302	0.0028	0.0032											0	0.0957	0	0	0	0	0	0	0				7	ST	2	1	2	2
803	Male	3	6.08	8.6	7.1	0.35	0.22	0.9	1.85	1.1	4.74	5.2	0.1822	0.0464	0.181	0.0029	0.0031						0.0175	0.0175	0.0175			0.035	0.1647	0	0	0	0	0	2.7475	9.975				7	ST	2	1	2	2
804	Male	2	3.34	7.3	5.7	0.35	0.15	0.8	1.55	1.1	2.55	2	0.1198	0.0488	0.0054	0.0028	0.0032											0	0.1198	0	0	0	0	0	0	0				7	ST	2	1	2	2
805	Male	3	4.08	8.1	6.5	0.32	0.14	0.85	1.65	1.05	3.19	5.1	0.1039	0.0224	0.0101	0.0034	0.0033						0.0121	0.0121	0.0121			0.0242	0.0918	0	0	0	0	0	1.8997	6.897				7	ST	2	1	2	2
806	Male	1	3.51	7.6	5.9	0.32	0.13	0.85	1.5	0.9	2.67	4.5	0.1757	0.0595	0.0032	0.0023	0.0025	0.0387										0.0387	0.137	5.0697	0	0	0	0	0	0				7	ST	2	1	2	2
807	Male	3	4.21	7.9	6.4	0.3	0.21	0.85	1.7	1.05	3.21	5.9	0.234	0.0459	0.0086	0.0025	0.0027			0.066								0.066	0.168	0	0	5.214	0	0	0	0				7	ST	2	1	2	2
808	Female	4	5.48	8.4	6.9	0.32	0.09	1.25	1.65	1.05	4.12	5.4	0.4275	0.045	0.3008	0.0018	0.0022				0.0371							0.0371	0.3904	0	0	0	3.4503	0	0	0				7	ST	2	0	2	2
809	Male	4	5.27	8.1	6.6	0.38	0.18	0.9	1.6	1.15	3.88	6.4	0.4682	0.0121	0.0376	0.0026	0.0029					0.0439	0.0675	0.0675	0.0675			0.1789	0.3568	0	0	0	0	1.6682	10.5975	38.475				7	ST	2	1	2	2
810	Male	3	5.1	8.2	6.8	0.35	0.18	0.95	1.85	1.15	4.03	5.4	0.1694	0.3333	0.092	0.0027	0.003					0.0404						0.0404	0.129	0	0	0	0	1.5352	0	0				7	ST	2	1	2	2
811	Female	3	3.37	7.4	5.9	0.35	0.18	0.85	1.5	1.15	3.41	3.8	0.2055	0.0685	0.13646	0.0032	0.0032					0.0369	0.015	0.015	0.015			0.0669	0.1536	0	0	0	0	1.4022	2.355	8.55				7	ST	2	0	2	2
812	Male	3	4.44	8.3	6.5	0.35	0.15	1	1.75	1.05	2.67	4.9	0.1695	0.0986	0.134	0.0022	0.0026				0.0859							0.0859	0.0836	0	0	0	7.9887	0	0	0				7	ST	2	1	2	2
813	Female	3	8.04	9.5	7.5	0.35	0.13	1.35	2.05	1.2	6.41	4.8	0.386	0.1361	0.1029	0.0016	0.0013				0.0722			0.1008			0.1008	0.173	0.213	0	0	0	6.7146	0	0	57.456				8	ST	2	0	2	2
814	Female	2	4.25	7.5	5.8	0.32	0.14	0.85	1.35	1.25	3.26	3.7	0.1057	0.0538	0.0189	0.0013	0.0017					0.0313		0.0164		0.0164		0.0477	0.058	0	0	0	0	1.1894	0	9.348				8	ST	2	0	2	2
815	Female	5	5.2	8	6.4	0.39	0.15	0.95	1.86	1.15	3.94	4.6	0.377	0.0951	0.095	0.0013	0.0015	0.074										0.074	0.303	9.694	0	0	0	0	0	0				8	ST	2	0	2	2
816	Male	3	2.13	6.3	5	0.3	0.13	0.65	1.25	0.8	1.49	4.2	0.0952	0.0254	0.0156	0.002	0.0021						0.0244	0.0244	0.0244			0.0488	0.0708	0	0	0	0	0	3.8308	13.908				8	ST	2	1	2	1
817	Female	5	8.98	9.35	7.5	0.4	0.27	1.25	1.9	1.15	6.33	6.4	0.5723	0.2225	0.4402	0.0021	0.0022				0.1043							0.1043	0.468	0	0	0	9.6999	0	0	0				8	ST	2	0	2	2
818	Female	4	8.2	9.5	7.6	0.41	0.18	1.1	1.95	1.15	6.43	6.2	0.2883	0.1741	0.2661	0.0022	0.0024						0.0361	0.0361	0.0361			0.0722	0.2522	0	0	0	0	0	5.6677	20.577				8	ST	2	0	2	2
819	Male	3	2.25	6.3	5	0.29	0.14	0.75	1.25	0.9	1.67	4.5	0.1066	0.0354	0.01	0.0019	0.0019				0.0243			0.0089		0.0089		0.0332	0.0734	0	0	0	2.2599	0	0	5.073				8	ST	2	1	2	1
820	Male	1	1.83	5.8	4.6	0.31	0.13	0.55	1.15	0.75	1.27	3	0.0931	0.0309	0.0019	0.001	0.0011						0.0487	0.0487	0.0487			0.0974	0.0444	0	0	0	0	0	7.6459	27.759				8	ST	2	1	2	1
821	Male	3	2.5	6.4	5	0.33	0.13	0.65	1.4	0.9	1.89	4.2	0.0914	0.0374	0.0154	0.0009	0.0012				0.0306							0.0306	0.0608	0	0	0	2.8458	0	0	0				8	ST	2	1	2	1
822	Male	2	0.65	4.2	3.4	0.27	0.13	0.55	0.9	0.65	0.4	2.6	0.1323	0.019	0.0042	0.0007	0.0008	0.0245										0.0245	0.1078	3.2095	0	0	0	0	0	0				8	ST	2	1	2	1
823	Female	3	6.5	8.5	6.6	0.36	0.12	1.25	1.85	0.9	4.61	6.6	0.9994	0.1623	0.1228	0.0008	0.0011							0.1614			0.1614	0.1614	0.838	0	0	0	0	0	0	91.998				9	ST	2	0	2	2
824	Male	4	4.86	8.1	6.2	0.32	0.13	1.25	1.9	1	3.26	4.1	0.7544	0.1154	0.0158	0.0036	0.0038											0	0.7544	0	0	0	0	0	0	0				9	ST	2	1	2	2
825	Male	3	2.13	6.3	5	0.28	0.12	0.55	1.35	0.65	1.58	3.25	0.1469	0.0165	0.0166	0.0019	0.0021					0.0079	0.0943	0.0943	0.0943			0.1965	0.0447	0	0	0	0	0.3002	14.8051	53.751				9	ST	2	1	2	1
826	Male	3	5.92	8.3	6.6	0.36	0.3	1.5	2.05	0.87	4.62	6.15	0.6845	0.1288	0.0201	0.0039	0.0039						0.3587	0.3587	0.3587			0.7174	0.3258	0	0	0	0	0	56.3159	204.459				9	ST	2	1	2	2
827	Male	3	3.25	7.1	5.7	0.26	0.12	1.2	1.75	0.97	2.56	4.55	0.3772	0.0812	0.0114	0.0036	0.0037						0.065	0.2	0.065		0.135	0.265	0.1772	0	0	0	0	0	10.205	114				9	ST	2	1	2	2
828	Male	3	4.98	7.9	6.3	0.39	0.22	1.4	2.05	0.97	3.66	6.05	0.7205	0.1581	0.0126	0.0028	0.0031							0.3779			0.3779	0.3779	0.3426	0	0	0	0	0	0	215.403				9	ST	2	1	2	2
829	Male	4	4.74	7.7	6.4	0.21	0.017	2.1	1.75	0.92	3.92	4.67	0.5623	0.0857	0.0232	0.004	0.0037							0.285			0.285	0.285	0.2773	0	0	0	0	0	0	162.45				9	ST	2	1	2	2
830	Female	2	6.47	8.4	6.3	0.41	0.17	1.25	2.05	0.97	4.67	6.45	0.715	0.1056	0.0466	0.0028	0.0026							0.3391			0.3391	0.3391	0.3759	0	0	0	0	0	0	193.287				9	ST	2	0	2	2
831	Male	3	6.27	8.6	6.7	0.23	0.26	1.4	2.1	0.95	4.48	4.5	0.9767	0.1671	0.0648	0.0029	0.0025					0.2576		0.3887			0.3887	0.6463	0.3304	0	0	0	0	9.7888	0	221.559				9	ST	2	1	2	2
832	Male	2	5.2	8.2	6.5	0.36	0.19	1.15	2.1	1.05	4.39	7	0.3623	0.0689	0.009	0.0029	0.0027					0.268						0.268	0.0943	0	0	0	0	10.184	0	0				9	ST	2	1	2	2
833	Male	3	5.33	8.1	6.6	0.34	0.14	1.15	2	0.95	4.09	5.6	0.5732	0.1657	0.0108	0.0022	0.0026		0.0257									0.0257	0.5475	0	0.514	0	0	0	0	0				9	ST	2	1	2	2
834	Female	5	5.98	8.5	6.7	0.39	0.23	1.25	2.2	1	4.5	3.4	0.6822	0.1071	0.578	0.0032	0.0035						0.3513	0.3513	0.3513			0.7026	0.3309	0	0	0	0	0	55.1541	200.241				9	ST	2	0	2	2
835	Male	3	6.1	8.8	6.9	0.37	0.25	1.2	2.2	1.05	4.59	7	0.7593	0.1061	0.0247	0.003	0.003							0.1706			0.1706	0.1706	0.5887	0	0	0	0	0	0	97.242				9	ST	2	1	2	2
836	Male	2	2.17	4.69	3.5	0.35	0.11	0.85	0.6	0.8	1.62	4.1	0.2016	0.0559	0.0019	0.0028	0.0031											0	0.2016	0	0	0	0	0	0	0				9	ST	2	1	2	1
837	Male	4	2.86	6.9	5.5	0.31	0.11	0.85	1.6	0.9	2.18	4.5	0.3068	0.0646	0.001	0.003	0.0032				0.0635	0.0135		0.0993			0.0993	0.1763	0.1305	0	0	0	5.9055	0.513	0	56.601				9	ST	2	1	2	2
838	Female	3	4.42	7.3	6	0.35	0.16	1.05	1.85	1	3.45	7.1	0.4648	0.1474	0.2684	0.0036	0.0034						0.336	0.336	0.336			0.672	0.1288	0	0	0	0	0	52.752	191.52				9	ST	2	0	2	2
839	Male	4	4.52	7.6	6.2	0.42	0.16	0.95	2	1.1	3.26	8.1	0.6024	0.0795	0.0126	0.0037	0.0035					0.3315	0.1029	0.1029	0.1029			0.5373	0.168	0	0	0	0	12.597	16.1553	58.653				9	ST	2	1	2	2
840	Female	4	3.06	7	5.4	0.36	0.16	0.95	1.65	1.05	2.42	4.5	0.2815	0.0674	0.0112	0.0032	0.0036					0.1478		0.0753			0.0753	0.2231	0.0584	0	0	0	0	5.6164	0	42.921				10	ST	2	0	2	2
841	Female	4	1.59	6.1	5	0.32	0.14	0.8	1.4	0.75	1.25	3.1	0.2203	0.0482	0.2034	0.0026	0.003											0	0.2203	0	0	0	0	0	0	0				10	ST	2	0	2	1
842	Female	2	5.83	8.8	7	0.43	0.14	1.2	2.2	1.15	4.58	5.6	0.7292	0.047	0.05	0.0014	0.002											0	0.7292	0	0	0	0	0	0	0				10	ST	2	0	2	2
843	Male	3	2.73	6.8	5.5	0.34	0.16	1	1.7	1.15	2	3.3	0.4135	0.0502	0.0065	0.0017	0.0021	0.04478						0.01569			0.01569	0.06047	0.35303	5.86618	0	0	0	0	0	8.9433				10	ST	2	1	2	2
844	Male	4	4.99	8.1	6.5	0.33	0.14	1.1	2.1	1.1	3.7	5.8	0.5834	0.1174	0.6902	0.0028	0.0026							0.218			0.218	0.218	0.3654	0	0	0	0	0	0	124.26				10	ST	2	1	2	2
845	Female	1	4.28	7.6	5.9	0.33	0.2	0.1	1.75	0.95	3.36	4.25	0.3493	0.0432	0.0236	0.0029	0.0031						0.117	0.117	0.117			0.234	0.2323	0	0	0	0	0	18.369	66.69				10	ST	2	0	2	2
846	Male	4	5.3	8.2	6.2	0.21	0.1	1.05	1.95	0.95	3.86	6.05	0.7953	0.0326	0.0305	0.0031	0.0033											0	0.7953	0	0	0	0	0	0	0				10	ST	2	1	2	2
847	Female	2	4.46	7.4	6.5	0.34	0.08	0.75	1.75	0.85	3.37	5.05	0.3993	0.0316	0.0151	0.0011	0.0015					0.04021		0.1239			0.1239	0.16411	0.23519	0	0	0	0	1.52798	0	70.623				10	ST	2	0	2	2
848	Female	4	3.76	7.4	5.7	0.28	0.13	0.75	1.25	0.95	2.59	3.05	0.4136	0.0614	0.1744	0.0018	0.0021		0.0653					0.1357			0.1357	0.201	0.2126	0	1.306	0	0	0	0	77.349				10	ST	2	0	2	2
849	Male	3	2.12	6.4	4.9	0.29	0.08	0.55	1.45	0.65	1.52	3.15	0.2185	0.0117	0.0153	0.0012	0.0014							0.02403			0.02403	0.02403	0.19447	0	0	0	0	0	0	13.6971				10	ST	2	1	2	1
850	Male	1	2.92	6.8	5.1	0.3	0.08	0.7	1.55	0.85	2.09	2.75	0.1993	0.0223	0.0256	0.0016	0.0018											0	0.1993	0	0	0	0	0	0	0				10	ST	2	1	2	2
851	Female	4	5.76	8.3	6.4	0.3	0.1	0.85	1.7	0.9	4	1.75	0.6967	0.1509	0.3701	0.0019	0.0022											0	0.6967	0	0	0	0	0	0	0				10	ST	2	0	2	2
852	Female	3	6.63	8.7	6.7	0.31	0.13	1	1.95	1.05	4.86	3.25	0.8271	0.0806	0.3236	0.0032	0.0027	0.1691										0.1691	0.658	22.1521	0	0	0	0	0	0				10	ST	2	0	2	2
853	Male	2	7.42	9.1	7.3	0.37	0.13	1.05	2	1.05	5.28	3.05	0.923	0.0751	0.0155	0.0025	0.0025				0.017	0.0891		0.4071			0.4071	0.5132	0.4098	0	0	0	1.581	3.3858	0	232.047				10	ST	2	1	2	2
854	Male	2	4.7	8	6.2	0.36	0.13	0.85	1.65	0.85	3.55	3.75	0.6654	0.0469	0.0174	0.0029	0.0033	0.4185						0.02862			0.02862	0.44712	0.21828	54.8235	0	0	0	0	0	16.3134				10	ST	2	1	2	2
855	Male	1	1.6	5.7	4.1	0.29	0.07	0.5	1.35	0.75	1.23	3.95	0.221	0.0325	0.0108	0.0032	0.0032							0.0934			0.0934	0.0934	0.1276	0	0	0	0	0	0	53.238				10	ST	2	1	2	1
856	Male	3	3.56	7.3	5.4	0.23	0.1	0.65	1.55	0.95	2.7	2.75	0.4034	0.0461	0.0082	0.0026	0.0022			0.103		0.0197						0.1227	0.2807	0	0	8.137	0	0.7486	0	0				10	ST	2	1	2	2
857	Male	3	5.06	8.4	6.3	0.39	0.2	1.2	2.15	0.97	4.04	4.45	0.1432	0.072	0.0136	0.0036	0.004											0	0.1432	0	0	0	0	0	0	0				10	ST	2	1	2	2
858	Female	3	1.91	6.3	4.8	0.31	0.12	0.8	1.35	0.82	1.6	1.75	0.2488	0.0635	0.0118	0.0002	0.0002			0.0402								0.0402	0.2086	0	0	3.1758	0	0	0	0				10	ST	2	0	2	1
859	Male	4	5.03	8.1	6.6	0.25	0.12	1.2	1.75	1.07	1.39	3.15	0.2312	0.0732	0.063	0.0014	0.0016					0.0243						0.0243	0.2069	0	0	0	0	0.9234	0	0				10	ST	2	1	2	2
860	Male	4	3.99	7.5	6	0.38	0.22	1.2	1.8	0.97	3.22	2.75	0.265	0.1007	0.0113	0.0022	0.0024											0	0.265	0	0	0	0	0	0	0				11	ST	2	1	2	2
861	Male	2	2.3	6.85	5.3	0.31	0.14	0.85	1.5	0.87	2.02	1.85	0.5365	0.0636	0.0083	0.0033	0.0036			0.3215								0.3215	0.215	0	0	25.3985	0	0	0	0				11	ST	2	1	2	2
862	Female	5	4.27	8.1	6.4	0.36	0.14	1.2	1.95	0.92	3.46	3.65	0.5654	0.095	0.2836	0.003	0.0027							0.0906			0.0906	0.0906	0.4748	0	0	0	0	0	0	51.642				11	ST	2	0	2	2
863	Male	2	5.22	8.5	7.1	0.36	0.12	1.25	1.95	1.02	4.08	5.35	0.3166	0.0784	0.0055	0.002	0.0018							0.1023			0.1023	0.1023	0.2143	0	0	0	0	0	0	58.311				11	ST	2	1	2	2
864	Male	3	3.93	7.7	6	0.29	0.14	1.1	1.8	0.97	3.14	5.15	0.2307	0.0608	0.006	0.0025	0.0029	0.0245						0.1553			0.1553	0.1798	0.0509	3.2095	0	0	0	0	0	88.521				11	ST	2	1	2	2
865	Female	5	4.04	7.9	6.3	0.29	0.15	1.1	1.8	0.87	3.46	3.85	0.2405	0.1195	0.301	0.0024	0.0024	0.1203						0.01295			0.01295	0.13325	0.10725	15.7593	0	0	0	0	0	7.3815				11	ST	2	0	2	2
866	Female	2	3.23	7.6	6.1	0.36	0.12	1	1.7	0.82	2.74	1.75	0.1217	0.0214	0.0625	0.0002	0.0002						0.018					0.018	0.1037	0	0	0	0	0	2.826	0				11	ST	2	0	2	2
867	Female	4	6.26	8.7	7.4	0.47	0.19	1.1	2.2	1.2	5.01	6	0.498	0.1287	0.1947	0.0025	0.0027							0.0715			0.0715	0.0715	0.4265	0	0	0	0	0	0	40.755				11	ST	2	0	2	2
868	Male	2	7.51	9.4	7.6	0.4	0.26	1.22	1.95	1.1	5.93	7.4	0.3502	0.1052	0.0045	0.003	0.0028				0.0602			0.1202			0.1202	0.1804	0.1698	0	0	0	5.5986	0	0	68.514				11	ST	2	1	2	2
869	Male	2	7.12	9.5	7.9	0.44	0.23	1.25	2	1.3	6.05	8.55	0.4641	0.132	0.0401	0.003	0.0034											0	0.4641	0	0	0	0	0	0	0				11	ST	2	1	2	2
870	Male	3	7.92	9	7.6	0.46	0.22	1.3	2.05	1.25	6.58	11.15	0.6797	0.162	0.1854	0.0039	0.0038											0	0.6797	0	0	0	0	0	0	0				11	ST	2	1	2	2
871	Female	4	5.7	8.5	7	0.41	0.21	1.25	1.85	1.35	4.6	5.15	0.1907	0.126	0.4748	0.0002	0.0002	0.018						0.0802			0.0802	0.0982	0.0925	2.358	0	0	0	0	0	45.714				11	ST	2	0	2	2
872	Male	3	4.84	8.4	6.7	0.47	0.25	1.15	1.85	1.05	4.31	6.35	0.3871	0.1211	0.1684	0.0012	0.0017							0.0719			0.0719	0.0719	0.3152	0	0	0	0	0	0	40.983				11	ST	2	1	2	2
873	Female	1	2.69	6.8	5.6	0.37	0.17	1	1.6	1.1	2.55	4.65	0.1241	0.0534	0.0173	0.0016	0.0015						0.02349					0.02349	0.10061	0	0	0	0	0	3.68793	0				11	ST	2	0	2	2
874	Male	1	7.38	9.4	7.5	0.48	0.25	1.05	1.95	1.2	6.49	7.2	0.4145	0.1329	0.0054	0.002	0.0021							0.0736			0.0736	0.0736	0.3409	0	0	0	0	0	0	41.952				11	ST	2	1	2	2
875	Male	2	4.72	8	6.5	0.46	0.13	1.05	1.9	1.15	4.21	4.2	0.3464	0.1319	0.0066	0.0023	0.0023						0.1166					0.1166	0.2298	0	0	0	0	0	18.3062	0				11	ST	2	1	2	2
876	Male	3	7.43	9.6	7.6	0.47	0.21	1.15	2.2	1.15	6.6	8.2	0.5871	0.13	0.0115	0.0019	0.0022							0.0697			0.0697	0.0697	0.5174	0	0	0	0	0	0	39.729				11	ST	2	1	2	2
877	Female	1	6.98	9.1	7.5	0.41	0.23	1.25	1.9	1.1	6.34	6	0.3723	0.0908	0.0188	0.002	0.0019							0.0738			0.0738	0.0738	0.2985	0	0	0	0	0	0	42.066				11	ST	2	0	2	2
878	Male	1	1.45	5.6	4.4	0.24	0.11	0.85	1.9	1.1	1.36	3.8	0.5966	0.0318	0.0031	0.0004	0.0004				0.0654			0.0504			0.0504	0.1158	0.4808	0	0	0	6.0822	0	0	28.728				11	ST	2	1	2	1
879	Male	4	6.55	8.9	7.3	0.38	0.19	1.15	1.9	1.2	5.38	8.6	0.3713	0.1545	0.2599	0.0029	0.0022						0.1373					0.1373	0.234	0	0	0	0	0	21.5561	0				11	ST	2	1	2	2
880	Female	4	5.67	8.6	6.8	0.38	0.22	1.15	2.05	1.1	4.68	7	0.4789	0.1672	0.2142	0.0028	0.003							0.0598			0.0598	0.0598	0.4191	0	0	0	0	0	0	34.086				12	ST	2	0	2	2
881	Male	2	5.35	8.3	6.7	0.46	0.27	1.05	1.9	1.25	4.83	5.2	0.462	0.1546	0.0068	0.0019	0.0019			0.086				0.1724			0.1724	0.2584	0.2036	0	0	6.794	0	0	0	98.268				12	ST	2	1	2	2
882	Male	1	5.96	8.9	6.9	0.46	0.2	1.15	2.05	1.1	5.17	6.7	0.397	0.0621	0.0014	0.0029	0.0027											0	0.397	0	0	0	0	0	0	0				12	ST	2	1	2	2
883	Female	3	4.45	8.1	6.6	0.36	0.2	0.95	1.65	1.1	3.82	7	0.4891	0.0823	0.1935	0.002	0.0021						0.1378					0.1378	0.3513	0	0	0	0	0	21.6346	0				12	ST	2	0	2	2
884	Female	5	5.79	8.5	6.8	0.45	0.28	1.05	2.05	1.2	4.68	4	0.2358	0.064	0.6765	0.0004	0.0004							0.1003			0.1003	0.1003	0.1355	0	0	0	0	0	0	57.171				12	ST	2	0	2	2
885	Female	4	3.13	7	5.8	0.38	0.22	0.9	1.7	1	2.76	6	0.4166	0.0485	0.2618	0.0023	0.0021							0.126			0.126	0.126	0.2906	0	0	0	0	0	0	71.82				12	ST	2	0	2	2
886	Female	2	5.04	8.1	6.5	0.42	0.17	1.05	1.8	1.1	4.29	5.4	0.4269	0.0248	0.0313	0.002	0.0004				0.0095			0.0327			0.0327	0.0422	0.3847	0	0	0	0.8835	0	0	18.639				12	ST	2	0	2	2
887	Female	5	6.54	8.5	7.3	0.52	0.23	1	2	1.1	5.84	7.5	0.4699	0.0229	0.3475	0.0028	0.0024		0.0684									0.0684	0.4015	0	1.368	0	0	0	0	0				12	ST	2	0	2	2
888	Female	4	6.64	8.9	6.9	0.39	0.23	1.1	2	1.1	5.53	5.6	0.4561	0.1161	0.5018	0.0022	0.002							0.0129			0.0129	0.0129	0.4432	0	0	0	0	0	0	7.353				12	ST	2	0	2	2
889	Female	4	5.06	7.9	6.5	0.45	0.21	1	1.85	1.2	4.53	7	0.1967	0.0413	0.3996	0.0033	0.0004	0.0391										0.0391	0.1576	5.1221	0	0	0	0	0	0				12	ST	2	0	2	2
890	Female	4	2.03	6.3	4.9	0.31	0.13	0.75	1.3	0.8	1.64	3.4	0.1932	0.0483	0.6057	0.0015	0.0015							0.0433			0.0433	0.0433	0.1499	0	0	0	0	0	0	24.681				12	ST	2	0	2	1
891	Female	4	2.12	6.3	5	0.33	0.15	0.65	1.55	0.95	1.65	3.8	0.1271	0.0465	0.4304	0.0018	0.0004							0.0429			0.0429	0.0429	0.0842	0	0	0	0	0	0	24.453				12	ST	2	0	2	1
892	Female	4	3.16	7	5.5	0.33	0.16	0.8	1.65	0.95	2.51	5	0.1087	0.0838	0.2603	0.0015	0.0004				0.0205							0.0205	0.0882	0	0	0	1.9065	0	0	0				12	ST	2	0	2	2
893	Female	4	2.05	6.1	4.9	0.28	0.18	0.65	1.5	0.95	1.61	4.4	0.1052	0.0462	0.2667	0.0028	0.003				0.0371							0.0371	0.0681	0	0	0	3.4503	0	0	0				12	ST	2	0	2	1
894	Female	4	2.03	6.3	5	0.26	0.14	0.7	1.4	0.9	1.72	4	0.1387	0.0434	0.1474	0.0015	0.0016							0.0232			0.0232	0.0232	0.1155	0	0	0	0	0	0	13.224				12	ST	2	0	2	1
895	Male	3	1.91	6	4.8	0.38	0.14	0.6	1.35	0.75	1.7	3.4	0.1658	0.0467	0.0058	0.0014	0.0014						0.0186	0.0589	0.0186		0.0403	0.0775	0.1069	0	0	0	0	0	2.9202	33.573				12	ST	2	1	2	1
896	Male	3	1.76	5.9	4.4	0.32	0.13	0.7	1.35	0.8	1.48	3.8	0.2247	0.0342	0.0235	0.002	0.0017											0	0.2247	0	0	0	0	0	0	0				12	ST	2	1	2	1
897	Female	4	1.57	5.7	4.5	0.26	0.11	0.65	1.35	0.8	1.29	3.4	0.1875	0.0415	0.763	0.0015	0.0013						0.0148					0.0148	0.1727	0	0	0	0	0	2.3236	0				12	ST	2	0	2	1
898	Male	3	1.18	5.4	4.4	0.31	0.14	0.7	1.15	0.75	1.02	2.95	0.1295	0.0401	0.037	0.0014	0.0016							0.0103			0.0103	0.0103	0.1192	0	0	0	0	0	0	5.871				12	ST	2	1	2	1
899	Male	4	1.23	5.3	4.3	0.27	0.14	0.8	1.2	0.8	1.03	2.75	0.0692	0.0317	0.0295	0.0013	0.0015											0	0.0692	0	0	0	0	0	0	0				12	ST	2	1	2	1
900	Male	2	1.36	4.7	6	0.25	0.14	0.65	1.15	0.75	0.89	2.65	0.1048	0.0293	0.0024	0.0015	0.0016	0.0089						0.0163		0.0163		0.0252	0.0796	1.1659	0	0	0	0	0	9.291				12	ST	2	1	2	1
901	Female	4	1.17	5	4	0.24	0.14	0.65	1.25	1.85	1.01	2.35	0.0761	0.0352	0.5317	0.0015	0.0019							0.0315			0.0315	0.0315	0.0446	0	0	0	0	0	0	17.955				12	ST	2	0	2	1
902	Male	4	9.01	9.7	8	0.41	0.14	1.35	2.15	1.25	7.04	4.85	0.3104	0.1386	0.0471	0.003	0.0026											0	0.3104	0	0	0	0	0	0	0				12	ST	2	1	2	2
903	Female	4	8.57	8.8	8	0.34	0.23	1.4	2.7	1.1	6.88	4.55	0.5507	0.2353	0.5693	0.0036	0.0034							0.0066			0.0066	0.0066	0.5441	0	0	0	0	0	0	3.762				1	ST	2	0	1	2
904	Male	1	6.24	9.1	7.2	0.35	0.11	1	1.95	0.9	5.17	4.4	0.1772	0.1018	0.011	0.0032	0.0031						0.0134					0.0134	0.1638	0	0	0	0	0	2.1038	0				1	ST	2	1	1	2
905	Male	4	7.58	9	7.4	0.43	0.27	1.4	1.94	1.17	5.93	4.9	0.3179	0.193	0.0067	0.0025	0.0024			0.0207			0.0104					0.0311	0.2868	0	0	1.6353	0	0	1.6328	0				1	ST	2	1	1	2
906	Male	3	7.36	9.3	7.3	0.45	0.19	1.05	1.85	1	6.11	4.5	0.2483	0.1458	0.0079	0.0021	0.0025	0.0084										0.0084	0.2399	1.1004	0	0	0	0	0	0				1	ST	2	1	1	2
907	Male	1	6.31	9	7.4	0.4	0.2	0.85	2.05	1.05	5.05	4.7	0.3144	0.045	0.0085	0.0031	0.0031						0.0079	0.0238	0.0079		0.0159	0.0317	0.2906	0	0	0	0	0	1.2403	13.566				1	ST	2	1	1	2
908	Male	1	8.63	9.5	7.6	0.45	0.28	1.15	2.2	1.1	6.55	4.1	0.3619	0.1398	0.0056	0.0027	0.0031											0	0.3619	0	0	0	0	0	0	0				1	ST	2	1	1	2
909	Male	1	5.97	9	7.2	0.38	0.08	1.5	2.15	1.12	4.85	4.1	0.2307	1.015	0.0048	0.003	0.0034							0.0046			0.0046	0.0046	0.2261	0	0	0	0	0	0	2.622				1	ST	2	1	1	2
910	Female	3	8.67	9.7	7.8	0.38	0.07	1.55	2.2	1.17	6.9	4.9	0.3874	0.18	0.5697	0.0029	0.0032											0	0.3874	0	0	0	0	0	0	0				1	ST	2	0	1	2
911	Female	4	7.03	9	7.1	0.45	0.22	1.45	2.1	1.04	5.37	3.7	0.4052	0.1745	0.4179	0.0028	0.0028				0.0045							0.0045	0.4007	0	0	0	0.4185	0	0	0				1	ST	2	0	1	2
912	Male	3	9.96	10.3	8.4	0.53	0.23	1.55	2.45	1.09	8.41	4.9	0.1876	0.136	0.0121	0.004	0.0047	0.0048										0.0048	0.1828	0.6288	0	0	0	0	0	0				1	ST	2	1	1	2
913	Female	4	5.7	9.2	7.4	0.4	0.29	1.25	2.1	1.09	4.9	4.3	0.2506	0.146	0.4498	0.0023	0.0023							0.0114			0.0114	0.0114	0.2392	0	0	0	0	0	0	6.498				1	ST	2	0	1	2
914	Female	4	7.22	9.1	7.1	0.31	0.15	1.05	2.05	1.17	5.58	2.7	0.2774	0.1379	0.0911	0.0028	0.0038											0	0.2774	0	0	0	0	0	0	0				1	ST	2	0	1	2
915	Male	3	7.36	9.4	7.5	0.34	0.23	1.35	2.05	1.24	5.89	3.1	0.5596	0.2179	0.0182	0.0026	0.0027						0.0083					0.0083	0.5513	0	0	0	0	0	1.3031	0				1	ST	2	1	1	2
916	Female	4	5.76	9.1	7.2	0.37	0.25	0.9	1.95	0.97	4.53	3.1	0.1894	0.08	0.5024	0.0022	0.0022				0.0344							0.0344	0.155	0	0	0	3.1992	0	0	0				1	ST	2	0	1	2
917	Female	4	7.07	9	7.1	0.44	0.21	1.1	2	1.02	5.56	2.6	0.1934	0.0539	0.4147	0.0033	0.0017					0.0045		0.0226			0.0226	0.0271	0.1663	0	0	0	0	0.171	0	12.882				1	ST	2	0	1	2
918	Male	3	6.15	8.3	7.2	0.48	0.22	1	2.05	0.87	5.03	3.3	0.2474	0.0587	0.0135	0.003	0.0029						0.0961					0.0961	0.1513	0	0	0	0	0	15.0877	0				1	ST	2	1	1	2
919	Female	4	6.6	9.3	7.3	0.46	0.24	1.3	2.2	1.07	5.51	3.05	0.2903	0.1217	0.4466	0.0028	0.0036						0.2396	0.2396	0.2396			0.4792	0.0507	0	0	0	0	0	37.6172	136.572				1	ST	2	0	1	2
920	Female	4	7.85	9.5	7.6	0.44	0.25	1.4	2.2	1.52	5.91	2.65	0.3527	0.1704	0.0925	0.0036	0.0033						0.0662	0.0259			0.0259	0.0921	0.2606	0	0	0	0	0	10.3934	14.763				1	ST	2	0	1	2
921	Male	3	6.61	8.4	7.7	0.43	0.29	1.45	2.25	1.22	5.61	3	0.281	0.1033	0.0196	0.0038	0.0037							0.0257			0.0257	0.0257	0.2553	0	0	0	0	0	0	14.649				1	ST	2	1	1	2
922	Female	4	6.47	9.4	7.7	0.45	0.29	1.3	2.15	1.17	5.61	2.6	0.2397	0.0696	0.5038	0.0036	0.0035	0.0405										0.0405	0.1992	5.3055	0	0	0	0	0	0				1	ST	2	0	1	2
923	Female	5	6.28	8.9	7.1	0.52	0.23	1	1.95	1.2	5.12	2.3	0.1821	0.0508	0.4986	0.0024	0.0036							0.0466		0.0466		0.0466	0.1355	0	0	0	0	0	0	26.562				1	ST	2	0	1	2
924	Female	4	7.89	9.6	7.7	0.42	0.29	1.75	2.25	1.17	6.24	5.9	0.3124	0.1992	0.3964	0.0037	0.0034						0.0088	0.0483			0.0483	0.0571	0.2553	0	0	0	0	0	1.3816	27.531				1	ST	2	0	1	2
925	Female	5	7.11	9.5	7.5	0.48	0.25	0.95	1.95	1.15	5.66	5.7	0.3069	0.1472	0.6043	0.0035	0.0031						0.0489					0.0489	0.258	0	0	0	0	0	7.6773	0				1	ST	2	0	1	2
926	Female	5	9.31	10	8	0.45	0.14	1.35	2.35	1.25	7.29	5.1	0.3306	0.1589	0.429	0.0036	0.0032											0	0.3306	0	0	0	0	0	0	0				1	ST	2	0	1	2
927	Female	4	8.47	8.7	7.8	0.32	0.21	1.2	2.6	1	6.73	4.4	0.5281	0.2128	0.2589	0.0034	0.0032						0.0065					0.0065	0.5216	0	0	0	0	0	1.0205	0				1	ST	2	0	1	2
928	Female	4	6.44	9.3	7.3	0.38	0.12	1.1	2.1	0.95	5.37	4.6	0.2086	0.1332	0.2699	0.0036	0.0035							0.0061			0.0061	0.0061	0.2025	0	0	0	0	0	0	3.477				1	ST	2	0	1	2
929	Female	4	7.58	8.9	7.1	0.43	0.24	1.15	1.89	1.1	5.73	4.7	0.295	0.1705	0.146	0.0025	0.0024				0.1064							0.1064	0.1886	0	0	0	9.8952	0	0	0				2	ST	2	0	1	2
930	Female	4	7.56	9.5	7.4	0.48	0.2	1.15	2	1.05	6.31	4.7	0.2797	0.1772	0.2641	0.0025	0.0029						0.0463					0.0463	0.2334	0	0	0	0	0	7.2691	0				2	ST	2	0	1	2
931	Female	4	6.51	9.2	7.5	0.43	0.21	0.95	2.2	1.1	5.25	4.9	0.3458	0.1214	0.2609	0.0035	0.0035											0	0.3458	0	0	0	0	0	0	0				2	ST	2	0	1	2
932	Female	4	8.83	9.7	7.7	0.48	0.29	1.25	2.35	1.15	6.75	4.3	0.3933	0.1712	0.4879	0.0031	0.0035				0.0761			0.0464			0.0464	0.1225	0.2708	0	0	0	7.0773	0	0	26.448				2	ST	2	0	1	2
933	Female	4	5.97	8.9	6.9	0.38	0.05	1.25	2.1	1.05	4.65	3.9	0.2078	0.9925	0.4911	0.003	0.0034											0	0.2078	0	0	0	0	0	0	0				2	ST	2	0	1	2
934	Male	3	8.67	9.6	7.5	0.38	0.04	1.3	2.15	1.1	6.7	4.7	0.3645	0.1575	0.009	0.0029	0.0032						0.0105	0.0151			0.0151	0.0256	0.3389	0	0	0	0	0	1.6485	8.607				2	ST	2	1	1	2
935	Male	4	7.03	8.8	6.8	0.46	0.19	1.25	2.05	1.05	5.07	3.4	0.3732	0.1431	0.0221	0.0028	0.0028	0.0256										0.0256	0.3476	3.3536	0	0	0	0	0	0				2	ST	2	1	1	2
936	Female	5	9.96	10.1	8.1	0.54	0.2	1.35	2.4	1.1	8.11	4.6	0.1556	0.1046	0.7616	0.004	0.0047											0	0.1556	0	0	0	0	0	0	0				2	ST	2	0	1	2
937	Male	4	5.7	9	7.1	0.41	0.26	1.05	2.05	1.1	4.6	4	0.2186	0.1146	0.0338	0.0023	0.0023	0.02553										0.02553	0.19307	3.34443	0	0	0	0	0	0				2	ST	2	1	1	2
938	Male	4	7.42	9.2	7.2	0.35	0.16	1.2	2.2	1.3	5.68	2.8	0.2997	0.1604	0.0263	0.0032	0.0042	0.0083						0.0079			0.0079	0.0162	0.2835	1.0873	0	0	0	0	0	4.503				2	ST	2	1	1	2
939	Male	3	7.36	9.2	7.2	0.35	0.2	1.15	2	1.25	5.59	2.8	0.5276	0.1865	0.0208	0.0026	0.0027							0.0045			0.0045	0.0045	0.5231	0	0	0	0	0	0	2.565				2	ST	2	1	1	2
940	Female	5	5.96	9.2	7.3	0.41	0.26	1.05	2.1	1.1	4.63	3.2	0.2117	0.1025	0.5285	0.0026	0.0026			0.0214				0.0067			0.0067	0.0281	0.1836	0	0	1.6906	0	0	0	3.819				2	ST	2	0	1	2
941	Male	4	7.27	9.1	7.2	0.48	0.22	1.25	2.15	1.15	5.66	2.7	0.2157	0.1363	0.0439	0.0037	0.0021											0	0.2157	0	0	0	0	0	0	0				2	ST	2	1	1	2
942	Female	5	6.35	8.4	7.3	0.52	0.23	1.15	2.2	1	5.13	3.4	0.2697	0.0812	0.385	0.0034	0.0033						0.0246	0.0085			0.0085	0.0331	0.2366	0	0	0	0	0	3.8622	4.845				2	ST	2	0	1	2
943	Male	1	6.5	9.1	7.1	0.45	0.22	1.15	2.1	1.05	5.26	2.8	0.2676	0.0993	0.0067	0.0026	0.0034				0.014			0.0091			0.0091	0.0231	0.2445	0	0	0	1.302	0	0	5.187				2	ST	2	1	1	2
944	Female	3	7.75	9.3	7.4	0.43	0.23	1.25	2.1	1.5	5.66	2.4	0.331	0.149	0.1001	0.0034	0.0031	0.0129						0.0219			0.0219	0.0348	0.2962	1.6899	0	0	0	0	0	12.483				2	ST	2	0	1	2
945	Male	3	6.61	8.3	7.4	0.43	0.26	1.2	2.2	1.15	5.41	2.8	0.2571	0.0798	0.0326	0.0038	0.0037			0.0532				0.0085			0.0085	0.0617	0.1954	0	0	4.2028	0	0	0	4.845				2	ST	2	1	1	2
946	Female	4	6.47	9.3	7.4	0.45	0.26	1.05	2.1	1.1	5.41	2.4	0.2158	0.0461	0.2066	0.0036	0.0035			0.0142								0.0142	0.2016	0	0	1.1218	0	0	0	0				2	ST	2	0	1	2
947	Male	3	6.18	8.8	6.9	0.5	0.21	0.8	1.85	1.1	4.97	2.15	0.1695	0.0383	0.0133	0.0022	0.0034	0.0225										0.0225	0.147	2.9475	0	0	0	0	0	0				2	ST	2	1	1	2
948	Female	1	7.79	9.5	7.5	0.4	0.27	1.55	2.15	1.07	6.09	5.75	0.2998	0.1867	0.0182	0.0035	0.0032	0.003			0.0676		0.0278	0.0057			0.0057	0.1041	0.1957	0.393	0	0	6.2868	0	4.3646	3.249				2	ST	2	0	1	2
949	Female	4	7.01	9.4	7.3	0.46	0.23	0.75	1.85	1.05	5.51	5.55	0.2943	0.1347	0.2446	0.0033	0.0029				0.0325							0.0325	0.2618	0	0	0	3.0225	0	0	0				2	ST	2	0	1	2
950	Female	1	2.66	6.4	5	0.33	0.08	0.59	1.35	1.14	2.18	2.9	0.1091	0.0158	0.0112	0.0017	0.0015							0.0115		0.0115		0.0115	0.0976	0	0	0	0	0	0	6.555				3	BL	3	0	1	1
951	Female	2	2.6	6.4	5	0.34	0.1	0.73	1.35	1.05	2.13	3.2	0.2176	0.021	0.0156	0.0013	0.0012	0.0025						0.0402			0.0402	0.0427	0.1749	0.3275	0	0	0	0	0	22.914				3	BL	3	0	1	1
952	Male	2	1.47	5.3	4	0.3	0.07	0.55	1.16	0.95	1.18	2.3	0.0912	0.0162	0.0022	0.0013	0.001							0.0146			0.0146	0.0146	0.0766	0	0	0	0	0	0	8.322				3	BL	3	1	1	1
953	Female	1	1.16	5.1	4	0.29	0.1	0.5	1.07	0.9	0.91	1.9	0.1622	0.0073	0.0031	0.001	0.0008			0.0856				0.0167			0.0167	0.1023	0.0599	0	0	6.7624	0	0	0	9.519				3	BL	3	0	1	1
954	Female	1	2.28	6.2	4.8	0.35	0.08	0.59	1.21	1.09	1.83	2	0.1119	0.0188	0.0065	0.0012	0.0009							0.0151			0.0151	0.0151	0.0968	0	0	0	0	0	0	8.607				3	BL	3	0	1	1
955	Male	4	6.49	8.3	6.7	0.43	0.12	0.95	1.86	1.14	5.73	3.8	0.219	0.1253	0.0266	0.0032	0.0029							0.0025			0.0025	0.0025	0.2165	0	0	0	0	0	0	1.425				3	BL	3	1	1	2
956	Female	1	3.87	7.7	6	0.42	0.21	0.77	1.63	1.09	3.41	3.4	0.1313	0.0933	0.0304	0.0027	0.003							0.0198			0.0198	0.0198	0.1115	0	0	0	0	0	0	11.286				3	BL	3	0	1	2
957	Female	4	6.43	8.4	6.6	0.43	0.17	1	1.67	1.14	5.58	4.1	0.2207	0.1951	0.2618	0.0024	0.0023							0.0141			0.0141	0.0141	0.2066	0	0	0	0	0	0	8.037				3	BL	3	0	1	2
958	Male	2	4.42	7.8	5.9	0.38	0.17	0.86	1.67	0.9	3.7	4.8	0.3542	0.098	0.0098	0.0014	0.0011											0	0.3542	0	0	0	0	0	0	0				3	BL	3	1	1	2
959	Male	3	3.82	7.1	5.6	0.38	0.24	0.64	1.44	1	3.16	5	0.3032	0.0551	0.0078	0.0026	0.0024							0.0543			0.0543	0.0543	0.2489	0	0	0	0	0	0	30.951				3	BL	3	1	1	2
960	Female	3	4.55	7.3	5.8	0.29	0.12	0.91	1.81	1	3.33	5	0.5339	0.0912	0.1174	0.0023	0.0021							0.218			0.218	0.218	0.3159	0	0	0	0	0	0	124.26				3	BL	3	0	1	2
961	Male	4	4.16	7.1	5.6	0.34	0.21	0.09	1.72	1	3.33	4	0.3628	0.0719	0.0629	0.0029	0.0031							0.117			0.117	0.117	0.2458	0	0	0	0	0	0	66.69				3	BL	3	1	1	2
962	Female	3	8.46	8.8	7.1	0.37	0.11	1.05	1.91	1.09	6.55	4.2	0.2829	0.1198	0.5382	0.0027	0.0023	0.0089										0.0089	0.274	1.1659	0	0	0	0	0	0				3	BL	3	0	1	2
963	Female	4	8.05	8	7.1	0.31	0.2	1.09	2.42	0.95	6.39	4	0.5112	0.2117	0.394	0.0032	0.003							0.0315			0.0315	0.0315	0.4797	0	0	0	0	0	0	17.955				3	BL	3	0	1	2
964	Female	2	4.16	7.4	5.8	0.31	0.16	0.77	1.44	1.09	3.47	4.5	0.1652	0.1142	0.0346	0.0021	0.0021	0.0175		0.0348								0.0523	0.1129	2.2925	0	2.7492	0	0	0	0				3	BL	3	0	1	2
965	Female	2	3.54	7.1	5.6	0.36	0.18	0.68	1.35	1.05	2.87	4.3	0.2523	0.056	0.0205	0.0019	0.0019			0.0035				0.0082			0.0082	0.0117	0.2406	0	0	0.2765	0	0	0	4.674				3	BL	3	0	1	2
966	Female	5	7.5	8.1	6.7	0.45	0.14	1.09	1.95	1	6.57	4.6	0.1833	0.1893	0.3011	0.0022	0.002											0	0.1833	0	0	0	0	0	0	0				3	BL	3	0	1	2
967	Female	4	3.83	6.9	5.6	0.37	0.09	0.86	1.67	0.9	3.32	4.1	0.1555	0.0676	0.2013	0.0027	0.0023											0	0.1555	0	0	0	0	0	0	0				3	BL	3	0	1	1
968	Male	3	2.19	6	4.9	0.27	0.14	0.82	1.49	0.83	2.13	3.1	0.0963	0.0524	0.0112	0.0023	0.0025											0	0.0963	0	0	0	0	0	0	0				3	BL	3	1	1	1
969	Male	2	2.61	6.1	4.6	0.32	0.18	0.77	1.35	1.33	2.23	2.3	0.1407	0.0398	0.004	0.0017	0.0016							0.0169			0.0169	0.0169	0.1238	0	0	0	0	0	0	9.633				3	BL	3	1	1	1
970	Male	4	5.64	8.2	6.4	0.4	0.16	0.86	1.86	1.24	4.86	4.3	0.1457	0.0946	0.0385	0.0026	0.0024						0.0009					0.0009	0.1448	0	0	0	0	0	0.1413	0				3	ST	2	1	1	2
971	Female	4	6.9	8.6	6.7	0.43	0.24	1.23	1.95	0.86	5.68	4.5	0.1826	0.1175	0.1461	0.003	0.0023											0	0.1826	0	0	0	0	0	0	0				3	ST	2	0	1	2
972	Male	4	2.33	6.2	4.9	0.32	0.17	0.68	1.26	0.81	2.3	4.1	0.136	0.0269	0.0011	0.001	0.0009							0.0388			0.0388	0.0388	0.0972	0	0	0	0	0	0	22.116				3	ST	2	1	1	1
973	Male	2	7.5	8.7	6.9	0.4	0.19	1.05	2	1	6.11	4.5	0.2981	0.1493	0.0109	0.003	0.0031			0.0125								0.0125	0.2856	0	0	0.9875	0	0	0	0				3	ST	2	1	1	2
974	Female	2	1.07	5	3.9	0.36	0.26	0.5	1.16	1.05	0.9	2.5	0.0614	0.0211	0.0086	0.0009	0.0012	0.0019						0.0235			0.0235	0.0254	0.036	0.2489	0	0	0	0	0	13.395				3	ST	2	0	1	1
975	Female	5	4.98	7.5	6.3	0.37	0.2	0.91	1.44	0.95	3.78	3.2	0.1777	0.179	0.3481	0.002	0.0022			0.0167								0.0167	0.161	0	0	1.3193	0	0	0	0				3	ST	2	0	1	2
976	Male	3	5.06	7.5	6	0.33	0.13	1.05	1.86	0.9	3.89	5	0.5445	0.1574	0.0103	0.0021	0.0025		0.0257									0.0257	0.5188	0	0.514	0	0	0	0	0				3	ST	2	1	1	2
977	Male	3	7.52	8.3	6.9	0.44	0.21	1.18	1.91	1.19	6.25	10	0.6457	0.1539	0.1761	0.0037	0.0036											0	0.6457	0	0	0	0	0	0	0				3	ST	2	1	1	2
978	Male	2	1.12	5	4	0.3	0.13	0.64	1.07	0.71	0.97	2.7	0.123	0.0381	0.0352	0.0013	0.0015							0.0103			0.0103	0.0103	0.1127	0	0	0	0	0	0	5.871				3	ST	2	1	1	1
979	Female	4	5.67	8.2	6.3	0.36	0.05	1.14	1.95	1	4.42	3.5	0.1974	0.9429	0.4665	0.0029	0.0032											0	0.1974	0	0	0	0	0	0	0				3	ST	2	0	1	2
980	Female	2	4.19	7.4	5.6	0.37	0.08	0.77	1.58	1.33	3.5	3.2	0.1688	0.0233	0.0169	0.002	0.002							0.0108			0.0108	0.0108	0.158	0	0	0	0	0	0	6.156				3	ST	2	0	1	2
981	Female	1	3.5	6.7	5.2	0.31	0.1	0.59	1.44	1.19	2.76	3.1	0.1421	0.0321	0.0138	0.0018	0.0019							0.0255			0.0255	0.0255	0.1166	0	0	0	0	0	0	14.535				3	ST	2	0	1	2
982	Female	2	0.97	4.9	4	0.33	0.08	0.42	1.08	0.9	0.81	2.3	0.0494	0.0092	0.0056	0.0007	0.001							0.0137			0.0137	0.0137	0.0357	0	0	0	0	0	0	7.809				3	ST	2	0	1	1
983	Female	1	0.77	4.6	3.5	0.22	0.07	0.47	0.99	0.76	0.64	1.5	0.0923	0.0031	0.0054	0.0004	0.0007							0.0088			0.0088	0.0088	0.0835	0	0	0	0	0	0	5.016				3	ST	2	0	1	1
984	Male	1	2.5	6.8	5.2	0.3	0.16	0.65	1.36	1	2.2	3	0.0788	0.0426	0.0091	0.0026	0.0028							0.0536			0.0536	0.0536	0.0252	0	0	0	0	0	0	30.552				3	ST	2	1	1	2
985	Male	2	2.36	6.7	5.3	0.4	0.13	0.65	1.5	0.9	1.98	3.9	0.0864	0.0291	0.0054	0.0014	0.0015							0.0028			0.0028	0.0028	0.0836	0	0	0	0	0	0	1.596				3	ST	2	1	1	2
986	Male	3	4.09	7.7	6	0.36	0.11	0.79	1.55	0.9	3.65	4.3	0.1926	0.039	0.0119	0.0017	0.0017							0.0487			0.0487	0.0487	0.1439	0	0	0	0	0	0	27.759				3	ST	2	1	1	2
987	Female	4	4.41	7.5	6	0.36	0.14	0.79	1.55	1.09	3.63	4.4	0.2798	0.0744	0.2156	0.0024	0.0023							0.0663			0.0663	0.0663	0.2135	0	0	0	0	0	0	37.791				3	ST	2	0	1	2
988	Male	2	2.1	6	4.8	0.29	0.13	0.7	1.36	0.71	1.64	3.1	0.1705	0.0466	0.0094	0.002	0.0022							0.1538			0.1538	0.1538	0.0167	0	0	0	0	0	0	87.666				3	TV	1	1	1	1
989	Female	3	5.47	7.6	5.9	0.33	0.26	1.26	1.83	0.81	4.15	5.3	0.6297	0.102	0.0938	0.0035	0.0035					0.0079		0.065			0.065	0.0729	0.5568	0	0	0	0	0.3002	0	37.05				3	TV	1	0	1	2
990	Female	1	2.43	6.3	5	0.33	0.14	0.74	1.41	0.95	2.28	4.1	0.1059	0.0389	0.0194	0.0013	0.0012							0.0802			0.0802	0.0802	0.0257	0	0	0	0	0	0	45.714				3	TV	1	0	1	1
991	Male	3	6.75	8.6	6.8	0.43	0.23	0.88	1.69	1.09	5.98	6.3	0.3829	0.1154	0.0276	0.0015	0.0016							0.0719			0.0719	0.0719	0.311	0	0	0	0	0	0	40.983				3	TV	1	1	1	2
992	Male	1	1.18	4.3	5.3	0.22	0.11	0.42	0.99	0.62	0.7	2.3	0.0876	0.016	0.0023	0.0012	0.0013							0.0103			0.0103	0.0103	0.0773	0	0	0	0	0	0	5.871				3	TV	1	1	1	1
993	Male	1	1.01	4.6	3.5	0.21	0.11	0.42	1.08	1.66	0.82	2	0.0603	0.0216	0.0015	0.0012	0.0016							0.0186			0.0186	0.0186	0.0417	0	0	0	0	0	0	10.602				3	TV	1	1	1	1
994	Male	2	2.14	6	4.7	0.38	0.11	0.6	1.32	0.81	1.47	5	0.103	0.0207	0.0222	0.0013	0.0013				0.0325							0.0325	0.0705	0	0	0	3.0225	0	0	0				3	TV	1	1	1	1
995	Female	1	2.61	6.7	6.1	0.29	0.19	0.7	1.36	0.76	1.95	4.1	0.0898	0.0298	0.0088	0.0013	0.0013							0.0079			0.0079	0.0079	0.0819	0	0	0	0	0	0	4.503				3	TV	1	0	1	1
996	Male	1	0.38	3.4	2.5	0.21	0.09	0.42	0.75	0.33	0.14	1.4	0.1197	0.0051	0.0046	0.0007	0.0007											0	0.1197	0	0	0	0	0	0	0				3	TV	1	1	1	1
997	Male	4	3.62	7.1	5.3	0.36	0.11	0.74	1.55	1.19	3.03	3.4	0.1111	0.0645	0.0219	0.0009	0.0009						0.0083					0.0083	0.1028	0	0	0	0	0	1.3031	0				3	TV	1	1	1	2
998	Female	1	0.92	4.7	3.8	0.24	0.08	0.37	0.94	0.81	0.73	2.5	0.6679	0.0137	0.0033	0.0007	0.0008				0.0018			0.0014			0.0014	0.0032	0.6647	0	0	0	0.1674	0	0	0.798				3	TV	1	0	1	1
999	Male	4	4.42	7.6	5.7	0.33	0.14	0.84	1.5	0.95	3.75	5	0.1504	0.0497	0.0566	0.0014	0.0015											0	0.1504	0	0	0	0	0	0	0				3	TV	1	1	1	2
1000	Male	1	1.7	5.5	4.2	0.28	0.12	0.6	1.27	0.71	1.5	2.3	0.0504	0.0188	0.0059	0.0021	0.0024	0.007					0.0175	0.0086			0.0086	0.0331	0.0173	0.917	0	0	0	0	2.7475	4.902				3	TV	1	1	1	1
1001	Male	2	2.19	6	4.9	0.27	0.18	0.7	1.27	0.81	1.93	3.7	0.1206	0.0429	0.0102	0.0017	0.0011			0.0012				0.0015			0.0015	0.0027	0.1179	0	0	0.0948	0	0	0	0.855				3	TV	1	1	1	1
1002	Female	1	3.62	7.1	5.5	0.38	0.14	0.84	1.55	1.33	3.03	3	0.1719	0.0407	0.0162	0.0014	0.0022							0.0333			0.0333	0.0333	0.1386	0	0	0	0	0	0	18.981				3	TV	1	0	1	1
1003	Female	2	3.1	7	5.2	0.35	0.28	0.74	1.18	1.33	2.72	3.1	0.1394	0.0224	0.0148	0.0011	0.0016	0.0405						0.0165			0.0165	0.057	0.0824	5.3055	0	0	0	0	0	9.405				3	TV	1	0	1	1
1004	Female	1	1.33	5.5	3.9	0.31	0.3	0.56	1.27	1.14	1.04	2.7	0.0657	0.0255	0.0101	0.0008	0.0012							0.0072			0.0072	0.0072	0.0585	0	0	0	0	0	0	4.104				3	TV	1	0	1	1
1005	Female	1	2.36	6.1	4.6	0.35	0.31	0.98	1.27	1.43	1.92	2.7	0.1316	0.0371	0.0162	0.0016	0.0017					0.002		0.0125			0.0125	0.0145	0.1171	0	0	0	0	0.076	0	7.125				3	TV	1	0	1	1
1006	Male	3	2.87	7.1	5.5	0.29	0.17	0.74	1.46	1.05	2.43	3.8	0.0936	0.0363	0.0161	0.0016	0.0015							0.0045			0.0045	0.0045	0.0891	0	0	0	0	0	0	2.565				3	TV	1	1	1	2
1007	Male	3	3.56	7.1	5.6	0.36	0.1	0.74	1.65	1.14	3.06	3.3	0.1145	0.086	0.0044	0.0017	0.0015											0	0.1145	0	0	0	0	0	0	0				3	TV	1	1	1	2
1008	Male	2	3.5	7.2	5.5	0.38	0.19	0.93	1.5	0.62	3.1	2.7	0.0989	0.0555	0.0072	0.0011	0.0011											0	0.0989	0	0	0	0	0	0	0				3	TV	1	1	1	2
1009	Male	2	3.75	7.1	5.5	0.38	0.19	0.93	1.6	0.67	3.27	3.2	0.1274	0.0954	0.0069	0.0014	0.0013											0	0.1274	0	0	0	0	0	0	0				3	CM	4	1	1	1
1010	Male	3	6.51	8.1	6.6	0.38	0.21	0.98	1.83	1.09	5.66	3.8	0.1959	0.1245	0.0167	0.0023	0.0026											0	0.1959	0	0	0	0	0	0	0				3	CM	4	1	1	1
1011	Female	4	5.18	7.9	6.2	0.32	0.17	1.02	1.6	0.95	4.06	5	0.3931	0.0641	0.3695	0.0027	0.0024				0.0658			0.0437			0.0437	0.1095	0.2836	0	0	0	6.1194	0	0	24.909				3	CM	4	0	1	2
1012	Female	1	5.99	8.3	6.6	0.41	0.24	1.12	1.93	1.19	4.86	5.7	0.3368	0.0928	0.0039	0.0028	0.0026							0.1088			0.1088	0.1088	0.228	0	0	0	0	0	0	62.016				3	CM	4	0	1	2
1013	Male	3	4.19	7.6	6	0.33	0.13	0.93	1.69	0.95	3.47	5.9	0.3138	0.0629	0.0043	0.0025	0.0026	0.0236										0.0236	0.2902	3.0916	0	0	0	0	0	0				3	CM	4	1	1	1
1014	Male	3	4.08	7.2	5.9	0.35	0.16	0.98	1.6	0.95	3.64	4.4	0.4626	0.0808	0.013	0.0015	0.0016			0.0145								0.0145	0.4481	0	0	1.1455	0	0	0	0				3	CM	4	1	1	1
1015	Male	2	9.65	9.4	7.5	0.48	0.12	1.21	2.12	1	7.68	4.2	0.3938	0.1546	0.0146	0.0037	0.0044						0.0103	0.1089	0.0496		0.0593	0.1192	0.2746	0	0	0	0	0	1.6171	62.073				3	CM	4	1	1	2
1016	Female	2	4.24	7.7	5.7	0.39	0.26	0.88	1.69	1.47	3.59	3.4	0.1808	0.0352	0.02	0.0022	0.0022											0	0.1808	0	0	0	0	0	0	0				3	CM	4	0	1	2
1017	Female	1	3.55	7.1	5.3	0.32	0.29	0.7	1.55	1.33	2.85	3.2	0.1541	0.044	0.0168	0.002	0.0021							0.0772			0.0772	0.0772	0.0769	0	0	0	0	0	0	44.004				3	CM	4	0	1	2
1018	Female	2	1.06	5.1	4	0.35	0.26	0.51	1.18	1.05	0.9	2.5	0.0614	0.0211	0.0086	0.0009	0.0012	0.0019						0.0235			0.0235	0.0254	0.036	0.2489	0	0	0	0	0	13.395				3	CM	4	0	1	1
1019	Female	1	0.86	4.8	3.5	0.24	0.25	0.56	1.08	0.9	0.73	1.7	0.1043	0.015	0.0085	0.0006	0.0009	0.0238						0.0131			0.0131	0.0369	0.0674	3.1178	0	0	0	0	0	7.467				3	CM	4	0	1	1
1020	Female	4	7.76	8.2	6.2	0.36	0.15	0.98	1.75	1.09	4.63	4.7	0.2624	0.1249	0.2164	0.0027	0.0026				0.109							0.109	0.1534	0	0	0	10.137	0	0	0				3	CM	4	0	1	2
1021	Male	4	5.04	8.1	6.9	0.33	0.14	0.98	1.69	0.9	3.82	3.8	0.2993	0.1474	0.0479	0.0028	0.0027				0.0187							0.0187	0.2806	0	0	0	1.7391	0	0	0				3	CM	4	1	1	1
1022	Male	3	4.68	7.4	5.8	0.37	0.21	1.3	1.93	0.92	3.48	5.4	0.6845	0.1502	0.012	0.0027	0.0029							0.3779			0.3779	0.3779	0.3066	0	0	0	0	0	0	215.403				3	CM	4	1	1	1
1023	Male	4	4.46	7.2	5.9	0.2	0.02	1.95	1.65	0.87	3.72	4.2	0.5342	0.0814	0.022	0.0038	0.0035							0.285			0.285	0.285	0.2492	0	0	0	0	0	0	162.45				3	CM	4	1	1	1
1024	Male	2	7.06	8.8	7	0.38	0.24	1.13	1.83	1.05	5.63	6.7	0.3327	0.0999	0.0043	0.0029	0.0027				0.0602			0.1202			0.1202	0.1804	0.1523	0	0	0	5.5986	0	0	68.514				3	CM	4	1	1	2
1025	Male	2	6.69	8.9	7.3	0.42	0.22	1.16	1.88	1.24	5.75	7.7	0.4409	0.1254	0.0381	0.0029	0.0032											0	0.4409	0	0	0	0	0	0	0				3	CM	4	1	1	2
1026	Male	1	5.6	8.4	6.3	0.44	0.19	1.07	1.93	1.05	4.91	6	0.3772	0.059	0.0013	0.0028	0.0026											0	0.3772	0	0	0	0	0	0	0				3	CM	4	1	1	1
1027	Male	3	6.92	8.7	6.7	0.43	0.18	0.98	1.74	0.95	5.8	4.1	0.2359	0.1385	0.0075	0.002	0.0024	0.0084										0.0084	0.2275	1.1004	0	0	0	0	0	0				3	CM	4	1	1	2
1028	Male	1	5.93	8.5	6.8	0.38	0.19	0.79	1.93	1	4.8	4.2	0.2987	0.0428	0.0081	0.0029	0.0029						0.0079	0.0238	0.0079		0.0159	0.0317	0.2749	0	0	0	0	0	1.2403	13.566				3	CM	4	1	1	1
1029	Male	3	6.21	7.9	7.1	0.41	0.27	1.35	2.12	1.16	5.33	2.7	0.267	0.0981	0.0186	0.0036	0.0035							0.0257			0.0257	0.0257	0.2413	0	0	0	0	0	0	14.649				3	CM	4	1	1	1
1030	Male	1	6.11	8.6	6.5	0.43	0.21	1.07	1.97	1	5	2.5	0.2542	0.0943	0.0064	0.0025	0.0032				0.014			0.0091			0.0091	0.0231	0.2311	0	0	0	1.302	0	0	5.187				3	CM	4	1	1	1
1031	Female	3	7.29	8.7	6.8	0.41	0.22	1.16	1.97	1.43	5.38	2.2	0.3145	0.1416	0.0951	0.0032	0.0029	0.0129						0.0219			0.0219	0.0348	0.2797	1.6899	0	0	0	0	0	12.483				3	CM	4	0	1	2
																		Tep	Ca	Oc	Cua	Giun	Kien	Khac
																	TSXH	131	20	79	93	38	157	570
																	%TSXH	12.0404	1.83824	7.26103	8.54779	3.49265	14.4301	52.3897
																	KL	4.62361	0.7397	2.8099	5.23773	2.02541	6.08359	33.71
																	%KL	8.37157	1.33931	5.08764	9.4835	3.66723	11.015	61.0357
																	Điểm	605.693	14.794	221.982	487.109	76.9656	955.124	19214.7
																	%Điểm	2.80721	0.0685658	1.02882	2.2576	0.356713	4.42671	89.0544
